# Supplementary material
Source: Royal Society of Chemistry journal article supplement (doi:10.1039/d6cc02200f)
Supplement: d6cc02200f1.pdf [file d6cc02200f1.pdf]

# **Zeta Potential Transition Correlates with Optimal DNA Origami Silicification Temperature**

Tingyan Ye<sup>#1, 3</sup>, Zhengwu Liang<sup>#1</sup>, Yuanhao Wang<sup>#2</sup>, Lu Cai<sup>1</sup>, Bochen Li<sup>1</sup>, Mingqiang Li<sup>1</sup>, Xiaoguo Liu<sup>1</sup> and Sisi Jia<sup>\*3</sup>

1. State Key Laboratory of Synergistic Chem-Bio Synthesis, School of Chemistry and Chemical Engineering, New Cornerstone Science Laboratory, Frontiers Science Center for Transformative Molecules, Zhang Jiang Institute for Advanced Study and National Center for Translational Medicine, Shanghai Jiao Tong University, Shanghai 200240, China

2. Department of Liver Surgery, Renji Hospital, School of Medicine, Shanghai Jiao Tong University Shanghai Institute of Transplantation Shanghai 200127, China

3. Zhangjiang Laboratory, Shanghai 201210, China

# These authors contributed equally to this work.

\*e-mails: [jiass@zjlab.ac.cn](mailto:jiass@zjlab.ac.cn)

## Content

|    |                                                                                             |    |
|----|---------------------------------------------------------------------------------------------|----|
| 1  | Materials and Methods .....                                                                 | 1  |
| 2  | The height analysis of square DNA origami from AFM images.....                              | 4  |
| 3  | Agarose gel electrophoresis characterization of square DNA origami (SDO).....               | 14 |
| 4  | SEM images of SDO after silicification at different temperatures.....                       | 15 |
| 5  | The quantitative analysis of square DNA origami from air-AFM images .....                   | 24 |
| 6  | Temperature-dependent zeta-potential distributions of SDO .....                             | 25 |
| 7  | Agarose gel electrophoresis characterization of DNA origami nanostructures.....             | 26 |
| 8  | AFM imaging of DNA origami nanostructures under air- and liquid-phase conditions .....      | 29 |
| 9  | Temperature-dependent zeta-potential distributions of DNA origami nanostructures.....       | 31 |
| 10 | SEM images of pristine DNA origami and after silicification at different temperatures ..... | 36 |
| 11 | The quantitative analysis of DNA origami from AFM images .....                              | 43 |
| 12 | Molecular dynamics simulations of temperature-dependent silicification .....                | 46 |
| 13 | Supplementary table .....                                                                   | 49 |
| 14 | Reference .....                                                                             | 70 |

# 1 Materials and Methods

## Materials

All oligonucleotides were synthesized and supplied by Shanghai Sangong Biotech Co., Ltd. The M13 scaffold strands were obtained from BioRuler Co., Ltd. Magnesium chloride hexahydrate ( $\geq 99\%$ ) were purchased from Adamas-Life. The Trichloromethane was purchased from Aladdin. Sodium hydroxide (NaOH), hydrochloric acid (HCl) and ethylenediaminetetraacetic acid disodium salt (EDTA-2Na, AR) were purchased from Sinopharm Group Chemical Reagent Co., Ltd. N-Trimethoxysilylpropyl-N,N,N-trimethylammonium chloride (TMAPS, 50% in methanol) and tetraethyl orthosilicate (TEOS) were purchased from TCI (Japan). SiO<sub>2</sub>/Si wafers featuring a 285 nm thermally grown SiO<sub>2</sub> layer were obtained from commercial suppliers. All other chemicals were purchased from Sinopharm and Sigma-Aldrich. AFM probes were sourced from Bruker. Unless otherwise noted, all reagents and experimental consumables were used as received without further purification.

## Preparation of DNA nanostructure

Square DNA origami (SDO) structures were designed using caDNAno software. For assembly, the scaffold strand was combined with 192 staple strands at a molar ratio of 1:10 in TE-Mg<sup>2+</sup> buffer (5 mM Tris, 1 mM EDTA, and 12 mM magnesium chloride, pH 8.0). The mixture was subjected to thermal annealing in a PCR thermocycler (Eppendorf), consisting of an initial incubation at 65 °C for 25 min, followed by gradual cooling from 60 to 40 °C at a rate of  $-1$  °C per 30 min. And subsequently from 40 °C to 25 °C at a rate of  $-1$  °C per 20 min. Upon completion of the cooling steps, the sample was immediately held at 4 °C. Excess staple strands were removed via polyethylene glycol (PEG)-based purification. Briefly, the annealed solution was mixed with an equal volume of PEG buffer (5 mM Tris, 1 mM EDTA, 505 mM NaCl, and 15% (w/v) PEG 8000, pH 8.0), followed by centrifugation at  $11,000 \times g$  for 17 min. The resulting DNA pellet was resuspended in  $1 \times$  TE-Mg<sup>2+</sup> buffer and incubated at 37 °C with gentle shaking (800 rpm) for 8 h to ensure complete dissolution. Subsequently, the DNA origami samples were purified by ultrafiltration using centrifugal filter units (MWCO 100 kDa). The samples were washed six times with  $1 \times$  TE-Mg<sup>2+</sup> buffer by centrifugation at  $8,000 \times g$  for 5 min at 25 °C. After the sixth wash, a final inverted centrifugation step was performed at  $5,000 \times g$  for 1.5 min at 25 °C to recover the concentrated DNA origami. The purified SDO was subsequently diluted to a final concentration of 20 nM in TE-Mg<sup>2+</sup> buffer and quantified using a UV-2600i UV-vis spectrophotometer (Shimadzu). Triangular DNA origami (TDO), ring-shape DNA origami (RDO), and 14-helix bundle (14HB) DNA origami were also designed using caDNAno, with 208, 225, and 151 staple strands, respectively. All other assembly and purification procedures were identical to those described for SDO.

## Agarose Gel Electrophoresis (AGE)

DNA samples were analyzed by agarose gel electrophoresis using a 1.0% agarose gel prepared in  $1 \times$  TE-MgCl<sub>2</sub> buffer (12 mM MgCl<sub>2</sub>) and stained with 0.01% GelRed. A 5  $\mu$ L aliquot of sample (10 nM in  $1 \times$  TE-Mg buffer containing 12 mM MgCl<sub>2</sub>) was mixed with 1  $\mu$ L of 6 $\times$  loading buffer and loaded into the gel wells. Electrophoresis was carried out on ice at 100 V for 60 min using  $1 \times$  TE-MgCl<sub>2</sub> buffer (12 mM MgCl<sub>2</sub>) as the running buffer. The bands were visualized under ultraviolet illumination. Band intensities were quantified using ImageJ software. A 1kb marker (Takara) was used as the reference standard.

### Silicification on surface

For surface silicification, the procedure was adapted from previously reported methods. Briefly, purified DNA origami structures were diluted to 2 nM and deposited onto plasma-treated mica or silicon wafer substrates. The precursor solution was prepared as follows: 1 mL of 1× TE-MgCl<sub>2</sub> buffer (containing 12 mM MgCl<sub>2</sub>) was added to a 10 mL glass vial at room temperature. Subsequently, 20 μL of TMAPS (50% in methanol) was slowly introduced under vigorous stirring, and the mixture was allowed to react for 20 min. Then, 20 μL of TEOS (or an equivalent amount of other organoalkoxysilanes, OASs) was added dropwise while maintaining stirring, followed by an additional 20 min of stirring to yield the precursor solution. The resulting solution was transferred into a centrifuge tube until the substrate was completely immersed. The silicon wafer substrate bearing DNA origami was gently placed onto the liquid surface and kept undisturbed for a predetermined reaction period. After silicification, the sample was rinsed once with Milli-Q water, once with 80% ethanol, and once with Milli-Q water again, then dried under a stream of nitrogen and further air-dried under ambient conditions.

### Zeta Potential Measurements

The concentration of the DNA liquid samples was diluted to 2 nM (total volume of 600 μL) and transferred into a disposable folded capillary cell (Malvern, DTS1070). The zeta potential of the samples was measured at different temperatures (4 °C, 15 °C, 25 °C, 32 °C, 37 °C, 45 °C, 55 °C, 65 °C, and 70 °C). Each measurement was performed after temperature equilibration to ensure stable conditions. The electrophoretic mobility obtained from the measurements was automatically converted to zeta potential values using the Smoluchowski model. All Zeta potential measurements were performed using a Zetasizer Ultra (Malvern Panalytical, Malvern, UK).

### AFM experiments

AFM imaging was performed in ScanAsyst in Air mode using a MultiMode 8 atomic force microscope (Bruker). The measurements were carried out with a SCANASYST-AIR probe (Bruker; tip height ≈ 650 nm, cantilever length ≈ 115 μm, resonance frequency ≈ 70 kHz, spring constant ≈ 0.4 N m<sup>-1</sup>). To minimize the influence of ambient humidity on height measurements, DNA/DNA-silica composites samples adsorbed on mica or silicon wafer were first dried under a nitrogen stream and subsequently kept at room temperature for 2 h prior to AFM characterization. Before imaging, the force curve of the probe was calibrated, after which the samples were scanned under ambient conditions.

Liquid-phase AFM imaging was performed using a fluid cell at room temperature (~25 °C). Freshly cleaved mica substrates were incubated with 2 nM DNA origami samples in buffer (10 μL, 5 mM Tris, 1 mM EDTA, 12 mM MgCl<sub>2</sub>, pH 8.0) for 5 minutes to allow adsorption. The substrate was then gently rinsed and transferred to a liquid cell containing imaging buffer (45 μL, 1×TAE-Mg, 10 mM NiCl<sub>2</sub>). AFM imaging was carried out in PeakForce mode. All AFM measurements in this study were performed at room temperature unless otherwise specified.

### AFM image analysis

AFM image analysis was performed using NanoScope Analysis (Bruker). The Particle Analysis module was used to obtain the height ( $h$ ), the sigma of height, projected area ( $A$ ), and equivalent diameter ( $D$ ) of individual particles. The uniformity of silicification was assessed using the thickness coefficient of variation (Thickness CV %, Equation 1). The sigma value of particle height obtained from Particle Analysis was used to calculate Thickness CV (%) as follows:

$$\text{Thickness CV (\%)} = \frac{\sigma_h}{\bar{h}} \times 100 \quad (1)$$

Where  $\sigma_h$  is the standard deviation of particle height and  $\bar{h}$  is the mean particle height. Lower Thickness CV values indicate more uniform silicification thickness among particles.

The structural fidelity after silicification was evaluated using area retention ( $A_{retention}$ , Equation 2) and diameter retention ( $D_{retention}$ , Equation 3), which reflect the preservation of the original particle geometry and overall dimensions relative to the corresponding unsilicified structures:

$$A_{retention} = \frac{A_{silicified}}{A_{pristine}} \quad (2)$$

$$D_{retention} = \frac{D_{silicified}}{D_{pristine}} \quad (3)$$

Root mean square roughness ( $R_q$ ) quantifies nanoscale surface height fluctuations of individual DNA origami particles, reflecting local surface roughness arising from silica deposition morphology and growth kinetics. Surface roughness was analyzed using the Roughness function in NanoScope Analysis. A region of 201.03 nm  $\times$  201.03 nm was selected for each measurement, and approximately 45 particles were included in the statistical analysis. Lower roughness values indicate a smoother and more homogeneous silicified surface.

### SEM Characterization

SEM imaging was performed using a Zeiss GeminiSEM 360 scanning electron microscope. For purified DNA samples, carbon-coated copper grids were treated in a PELCO easiGlow system (Ted Pella Inc.) for 60 s to increase surface hydrophilicity. Subsequently, 10  $\mu$ L of purified DNA (2 nM) was deposited onto the grids and incubated for 3 min to allow adsorption, followed by removal of excess solution using filter paper. Then, 5  $\mu$ L of 1% uranyl acetate was applied for 60 s as a negative stain, and the grids were then rinsed with 50  $\mu$ L of Milli-Q water and air-dried. For DNA-silica composites samples, the samples had been previously deposited onto silicon wafer and were directly imaged without further treatment. Imaging was conducted in STEM/InLens mode at an acceleration voltage of 15/2 kV. Due to aggregation of DSCs observed in SEM images, data variability was quantified using confidence intervals for error analysis.

### MD Simulations

We used a representative DNA origami fragment for MD simulations to investigate the effect of temperature on the interactions of silica precursors and DNA. All-atomistic MD simulations were performed with Amber14 package using ff14SB force field<sup>1</sup> and general Amber force field (GAFF)<sup>2</sup>. Force field parameters for silicon were obtained from previous reports<sup>3</sup>. Simulation system was solvated to a cuboid box using transferable intermolecular potential three point (TIP3P) water model, followed by adding Mg<sup>2+</sup> to a final concentration of 12.5 mM. Cl<sup>-</sup> counterions were then added to neutralize overall charges. Two rounds of energy minimizations were then carried out, with all atoms of nucleotides restrained in the first round and without any constraints in the second round. Then, the system was heated from 0 K to the target temperature (277K, 298K, 318K, 328K, 338K, respectively) within 300 ps in a canonical ensemble (NVT), followed by a 700-ps equilibration run. For each temperature, 3 independent rounds of 250 ns MD simulations were performed with random velocities for each system under isothermal isobaric (NPT) condition. The particle mesh Ewald (PME) method<sup>4</sup> was employed for long-range electrostatic interactions while a cutoff distance of 10 Å was applied for short-range electrostatic interactions as well as van der Waals interactions. Covalent bonds involving hydrogens were restricted using SHAKE methods. A time step of 2 fs was employed and the trajectory was stored every 100 ps. MD trajectories were analyzed using cpptraj package.

## 2 The height analysis of square DNA origami from AFM images

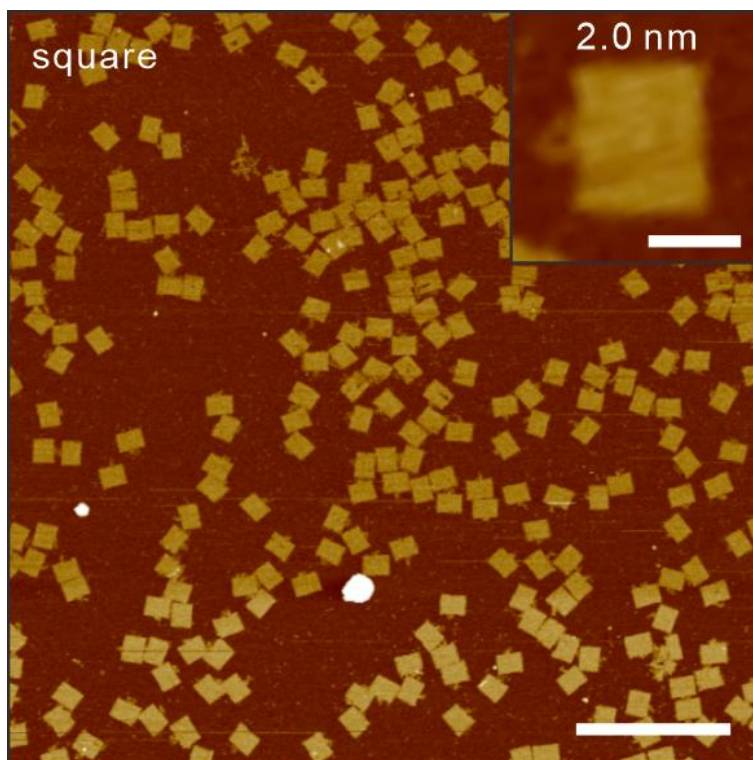

**Supplementary Fig. 1. The morphology and height characteristics of pristine square DNA origami architectures in liquid-phase AFM.** The AFM images of the square structures (scale bar, 600 nm), the inset shows a representative DNA origami with annotated average height (scale bar, 60 nm).

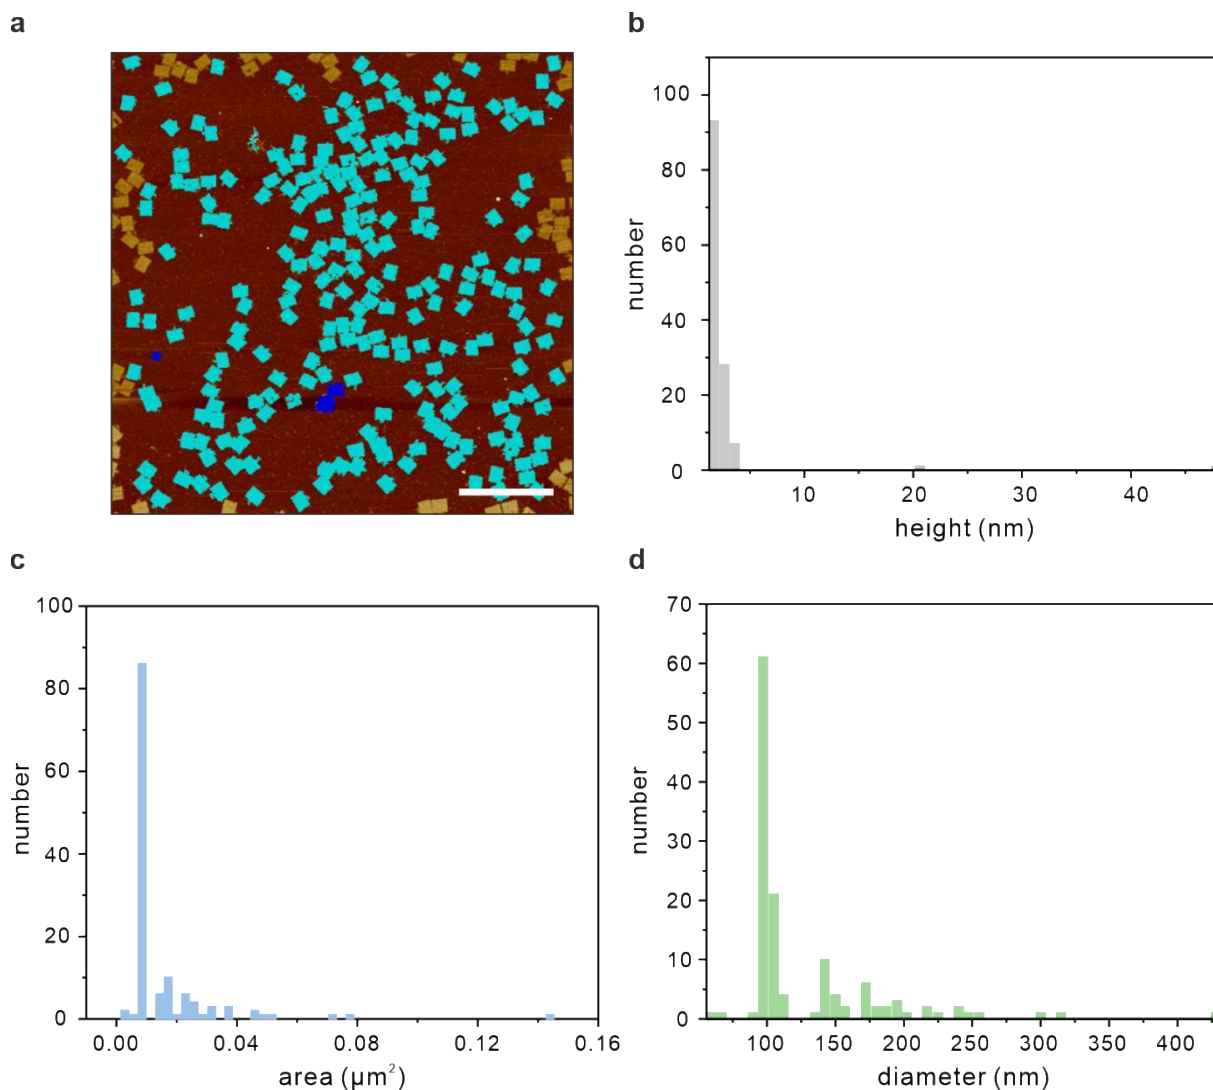

**Supplementary Fig. 2. Measurement approach for the height and area of pristine square DNA origami (SDO) in liquid-phase AFM images.** (a) Single particles in the AFM images were identified and screened using Nanoscope Analysis, with light blue particles included in the statistics, while dark blue particles were excluded due to stacking or structural deformation. Particle height statistics for individual particles are provided in the corresponding Figure S1 AFM images. (b) Pixel-by-pixel height distribution of the AFM images. (c) Histogram of average heights of all particles in the AFM image. (d) Histogram of average areas of all particles in the AFM image. All height measurements in this study were obtained using this method. Error bars in the height statistics represent standard deviations. Scale bar, 600 nm.

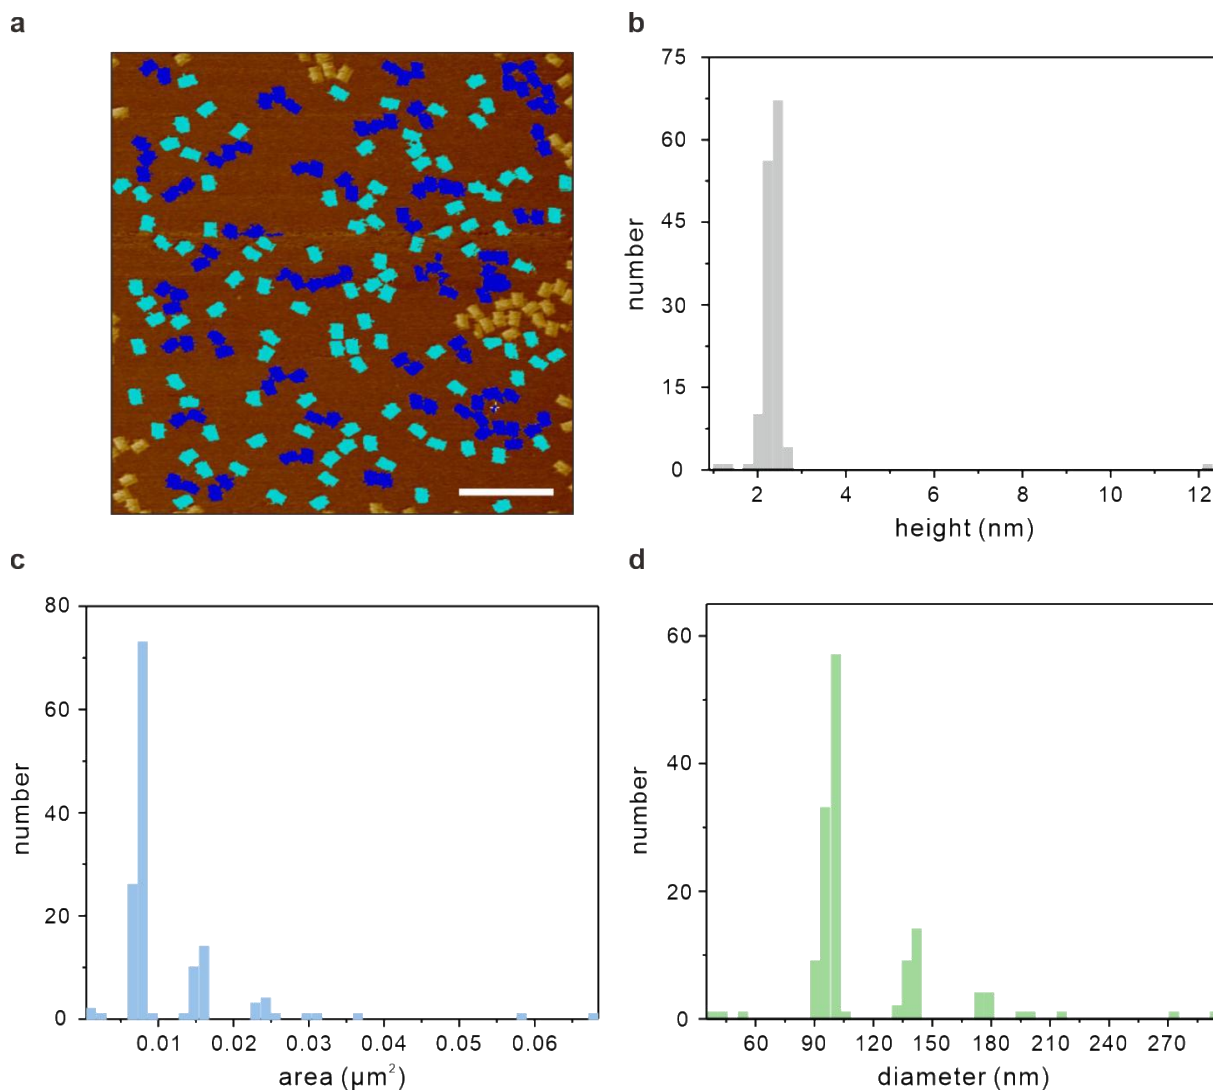

**Supplementary Fig. 3. Measurement approach for the height and area of pristine square DNA origami (SDO) in air-phase AFM images.** (a) Single particles in the AFM images were identified and screened using Nanoscope Analysis, with light blue particles included in the statistics, while dark blue particles were excluded due to stacking or structural deformation. Particle height statistics for individual particles are provided in the corresponding Figure 2b AFM images. (b) Pixel-by-pixel height distribution of the AFM images. (c) Histogram of average heights of all particles in the AFM image. (d) Histogram of average areas of all particles in the AFM image. All height measurements in this study were obtained using this method. Error bars in the height statistics represent standard deviations. Scale bar, 600 nm.

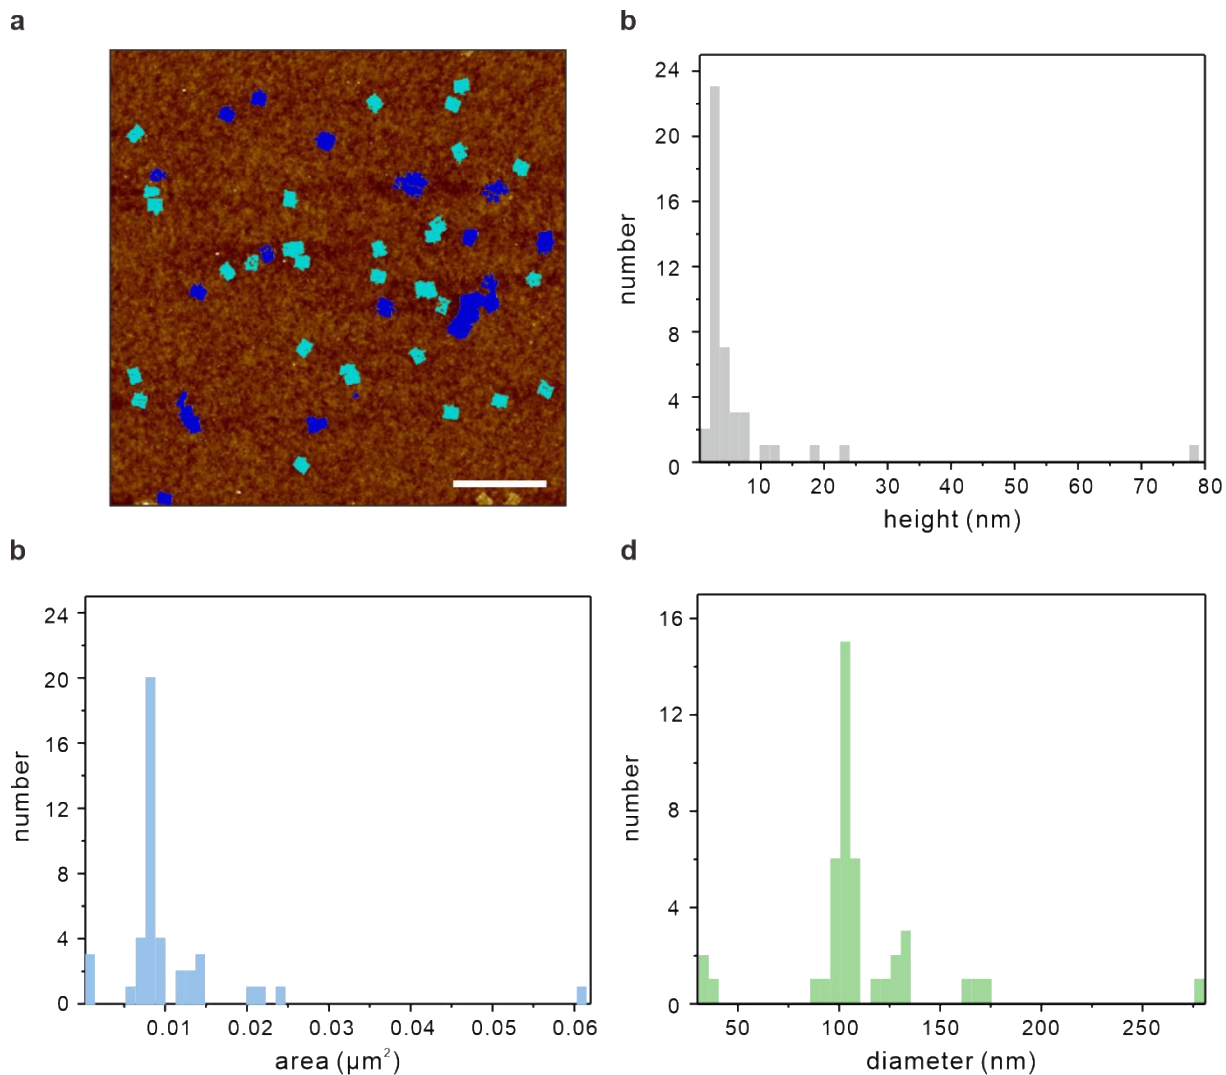

**Supplementary Fig. 4. Measurement approach for the height and area of square DNA origami (SDO) after silicification at 4 °C in air-phase AFM images.** (a) Single particles in the AFM images were identified and screened using Nanoscope Analysis, with light blue particles included in the statistics, while dark blue particles were excluded due to stacking or structural deformation. Particle height statistics for individual particles are provided in the corresponding Figure 2c AFM images. (b) Pixel-by-pixel height distribution of the AFM images. (c) Histogram of average heights of all particles in the AFM image. (d) Histogram of average areas of all particles in the AFM image. All height measurements in this study were obtained using this method. Error bars in the height statistics represent standard deviations. Scale bar, 600 nm.

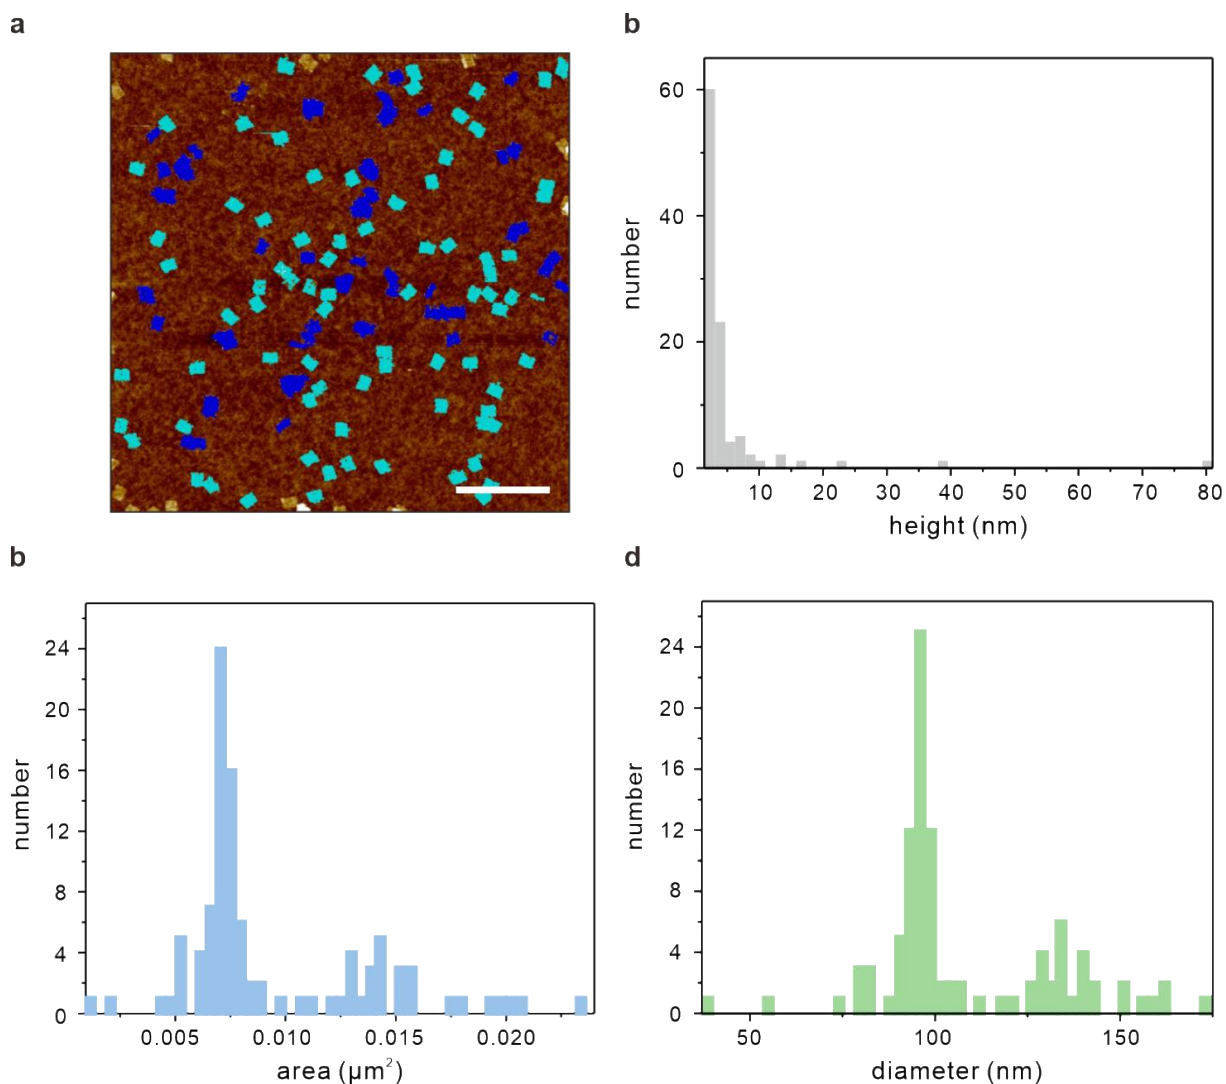

**Supplementary Fig. 5. Measurement approach for the height and area of square DNA origami (SDO) after silicification at 15°C in air-phase AFM images.** (a) Single particles in the AFM images were identified and screened using Nanoscope Analysis, with light blue particles included in the statistics, while dark blue particles were excluded due to stacking or structural deformation. Particle height statistics for individual particles are provided in the corresponding Figure 2d AFM images. (b) Pixel-by-pixel height distribution of the AFM images. (c) Histogram of average heights of all particles in the AFM image. (d) Histogram of average areas of all particles in the AFM image. All height measurements in this study were obtained using this method. Error bars in the height statistics represent standard deviations. Scale bar, 600 nm.

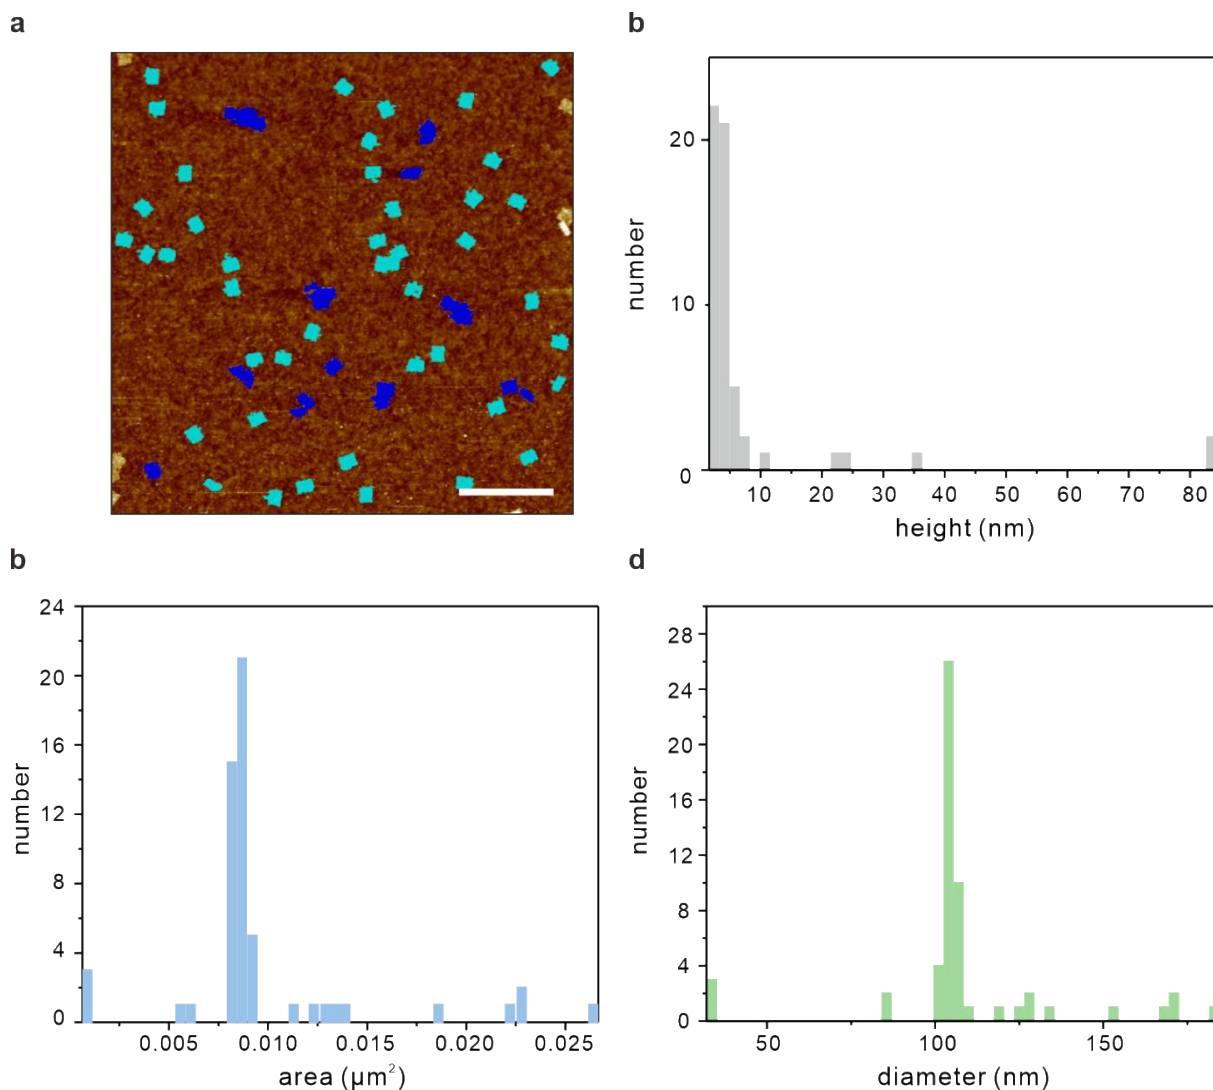

**Supplementary Fig. 6. Measurement approach for the height and area of square DNA origami (SDO) after silicification at 25°C in air-phase AFM images.** (a) Single particles in the AFM images were identified and screened using Nanoscope Analysis, with light blue particles included in the statistics, while dark blue particles were excluded due to stacking or structural deformation. Particle height statistics for individual particles are provided in the corresponding Figure 2e AFM images. (b) Pixel-by-pixel height distribution of the AFM images. (c) Histogram of average heights of all particles in the AFM image. (d) Histogram of average areas of all particles in the AFM image. All height measurements in this study were obtained using this method. Error bars in the height statistics represent standard deviations. Scale bar, 600 nm.

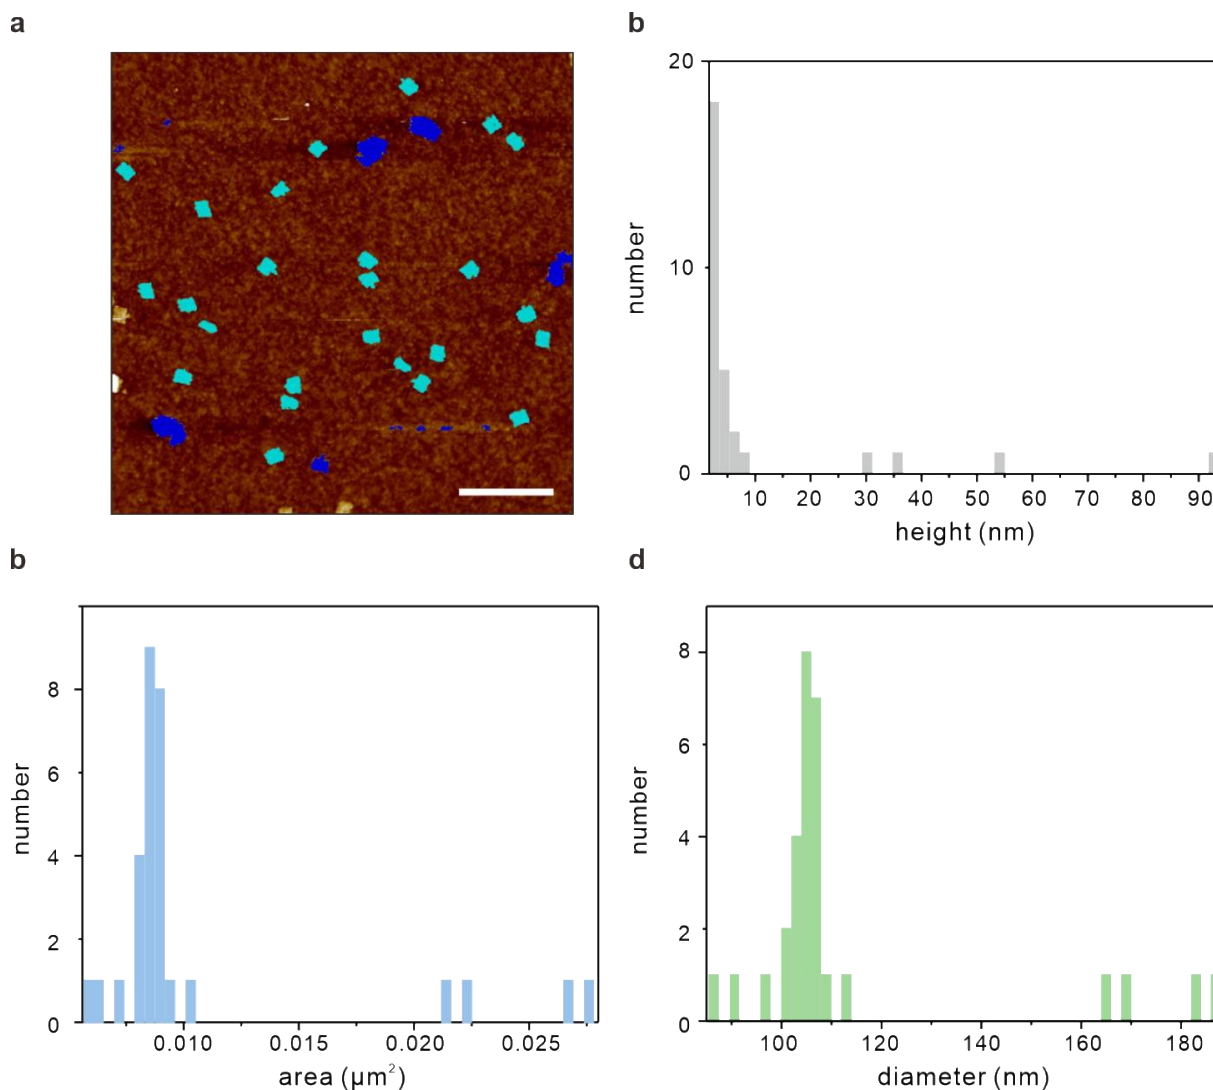

**Supplementary Fig. 7. Measurement approach for the height and area of square DNA origami (SDO) after silicification at 37°C in air-phase AFM images.** (a) Single particles in the AFM images were identified and screened using Nanoscope Analysis, with light blue particles included in the statistics, while dark blue particles were excluded due to stacking or structural deformation. Particle height statistics for individual particles are provided in the corresponding Figure 2f AFM images. (b) Pixel-by-pixel height distribution of the AFM images. (c) Histogram of average heights of all particles in the AFM image. (d) Histogram of average areas of all particles in the AFM image. All height measurements in this study were obtained using this method. Error bars in the height statistics represent standard deviations. Scale bar, 600 nm.

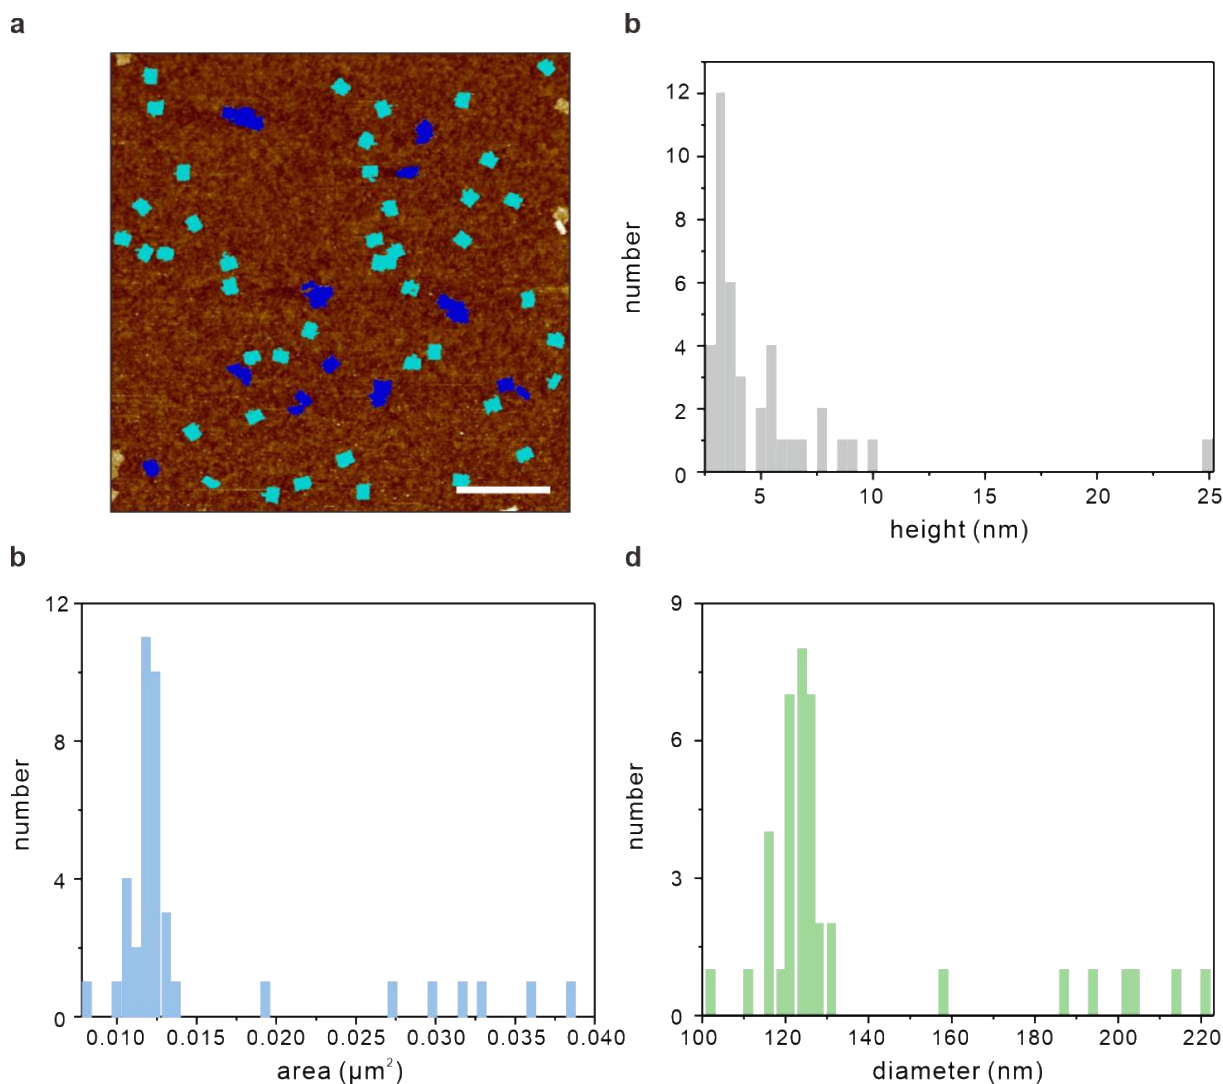

**Supplementary Fig. 8. Measurement approach for the height and area of square DNA origami (SDO) after silicification at 45°C in air-phase AFM images.** (a) Single particles in the AFM images were identified and screened using Nanoscope Analysis, with light blue particles included in the statistics, while dark blue particles were excluded due to stacking or structural deformation. Particle height statistics for individual particles are provided in the corresponding Figure 2g AFM images. (b) Pixel-by-pixel height distribution of the AFM images. (c) Histogram of average heights of all particles in the AFM image. (d) Histogram of average areas of all particles in the AFM image. All height measurements in this study were obtained using this method. Error bars in the height statistics represent standard deviations. Scale bar, 600 nm.

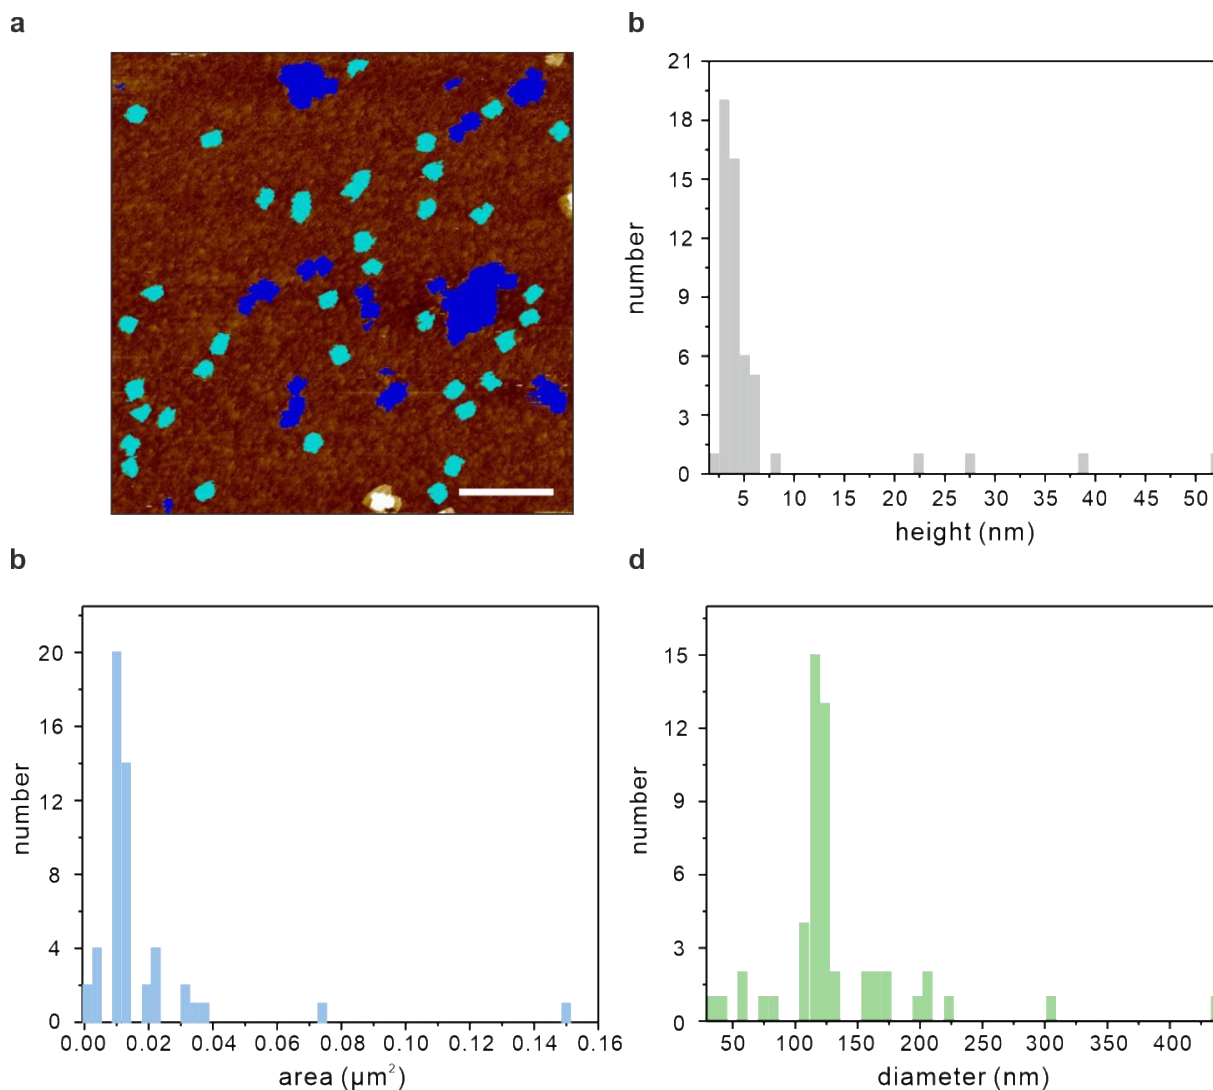

**Supplementary Fig. 9. Measurement approach for the height and area of square DNA origami (SDO) after silicification at 55°C in air-phase AFM images.** (a) Single particles in the AFM images were identified and screened using Nanoscope Analysis, with light blue particles included in the statistics, while dark blue particles were excluded due to stacking or structural deformation. Particle height statistics for individual particles are provided in the corresponding Figure 2h AFM images. (b) Pixel-by-pixel height distribution of the AFM images. (c) Histogram of average heights of all particles in the AFM image. (d) Histogram of average areas of all particles in the AFM image. All height measurements in this study were obtained using this method. Error bars in the height statistics represent standard deviations. Scale bar, 600 nm.

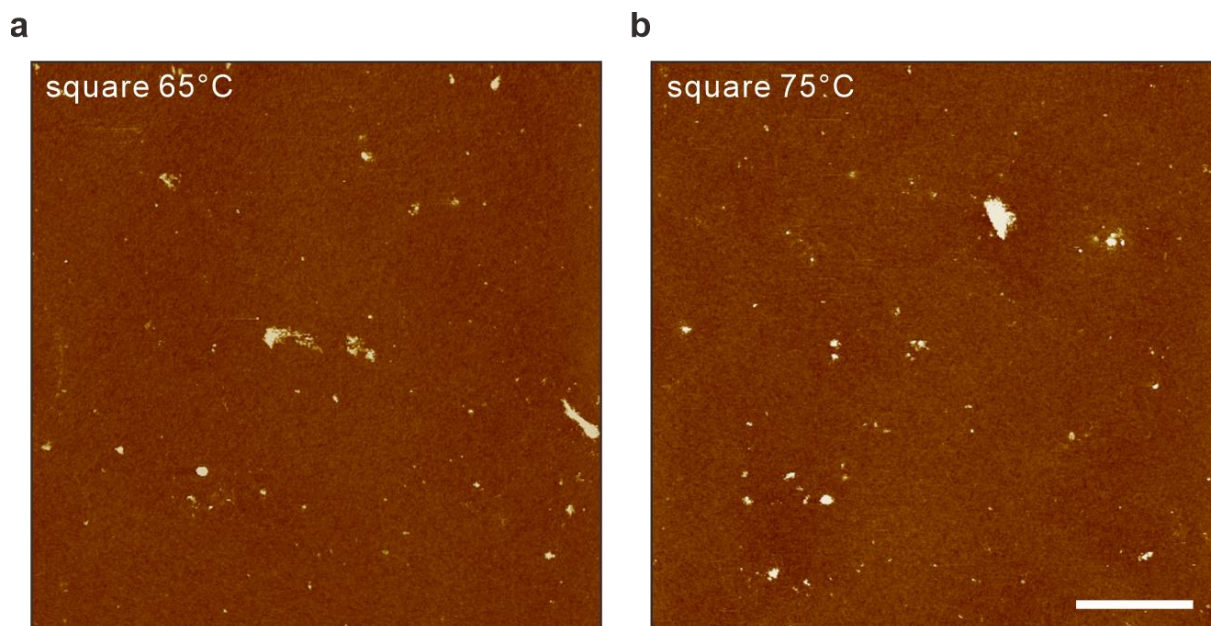

**Supplementary Fig. 10. Representative AFM images of square DNA origami after silicification at elevated temperatures.** Silicification at 65 °C (**a**) and 75 °C (**b**) led to structural deformation and collapse of the DNA origami, indicating that high temperatures compromise the integrity of the square DNA nanostructures. Scale bar, 2  $\mu\text{m}$ .

### 3 Agarose gel electrophoresis characterization of square DNA origami (SDO)

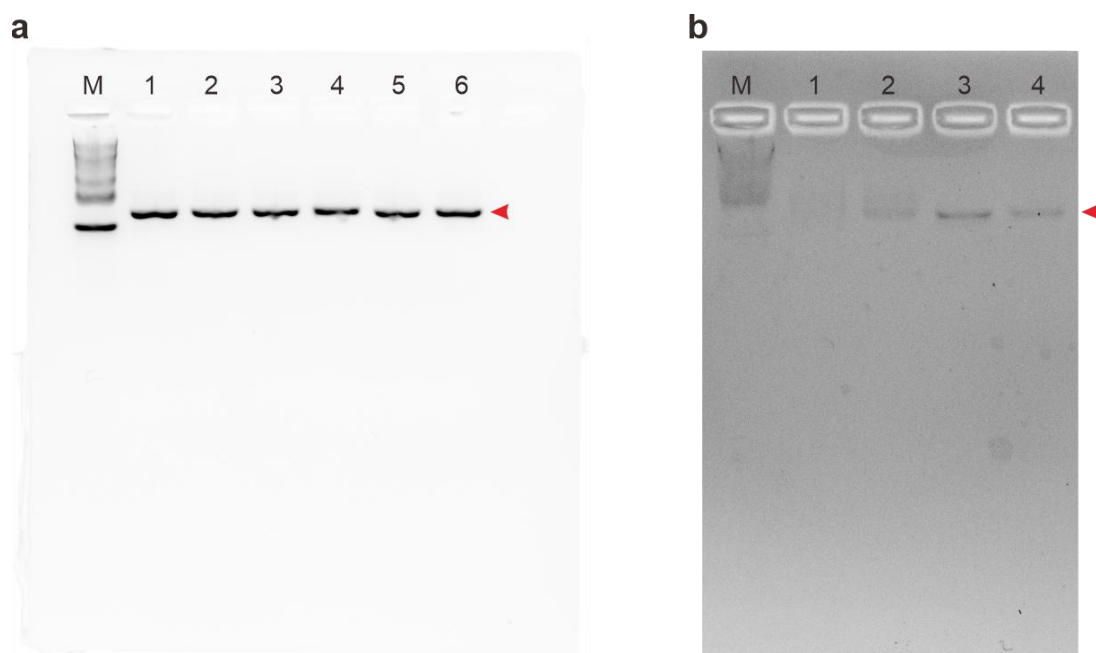

**Supplementary Fig. 11. 1% Agarose gel electrophoresis analysis of square DNA origami (SDO).** Representative agarose gel electrophoresis of purified square DNA origami after silicification at different silicification reaction temperatures. **a**, Lanes from left to right correspond to 1kb DNA ladder, pristine square DNA origami (10 nM) and square DNA origami (10 nM) silicification at 4, 15, 25, 37, and 45 °C, respectively, illustrating the effects of temperature on structural integrity. **b**, Lanes from left to right correspond to 1kb DNA ladder, square DNA origami (10 nM) silicification at 75, 65, 55 °C, respectively and pristine square DNA origami (10 nM), illustrating the effects of temperature on structural integrity. The red arrows indicated the corresponding electrophoretic band of the target products.

#### 4 SEM images of SDO after silicification at different temperatures

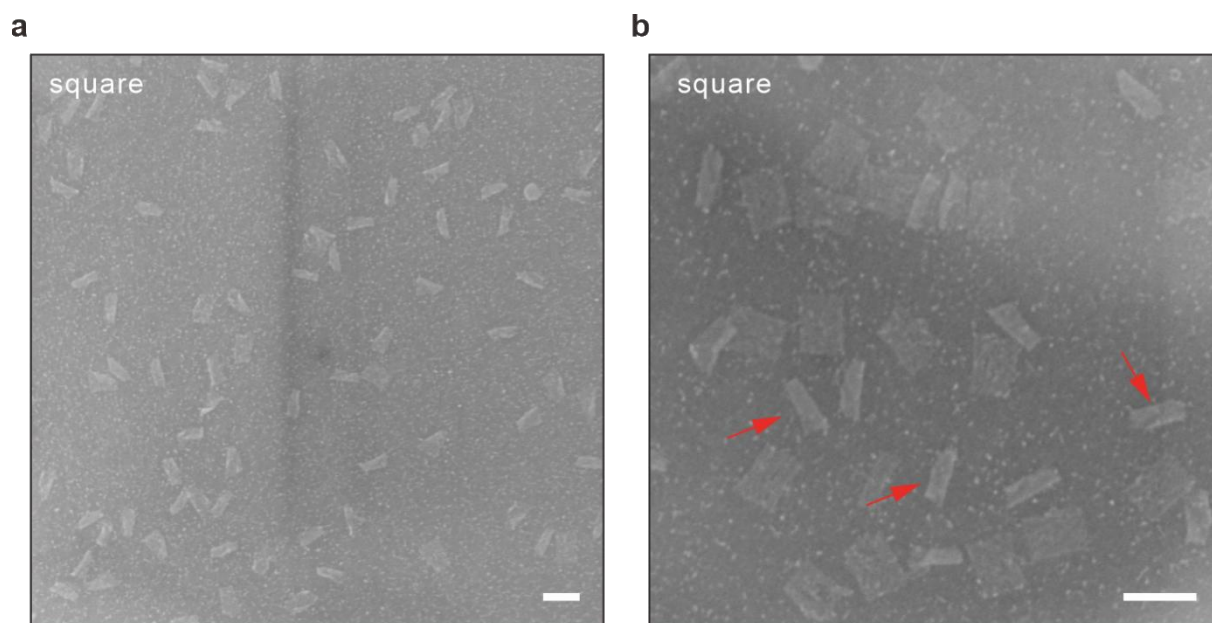

**Supplementary Fig. 12. SEM images of pristine square DNA origami. (a, b) Images at different magnifications. Scale bar, 100 nm.**

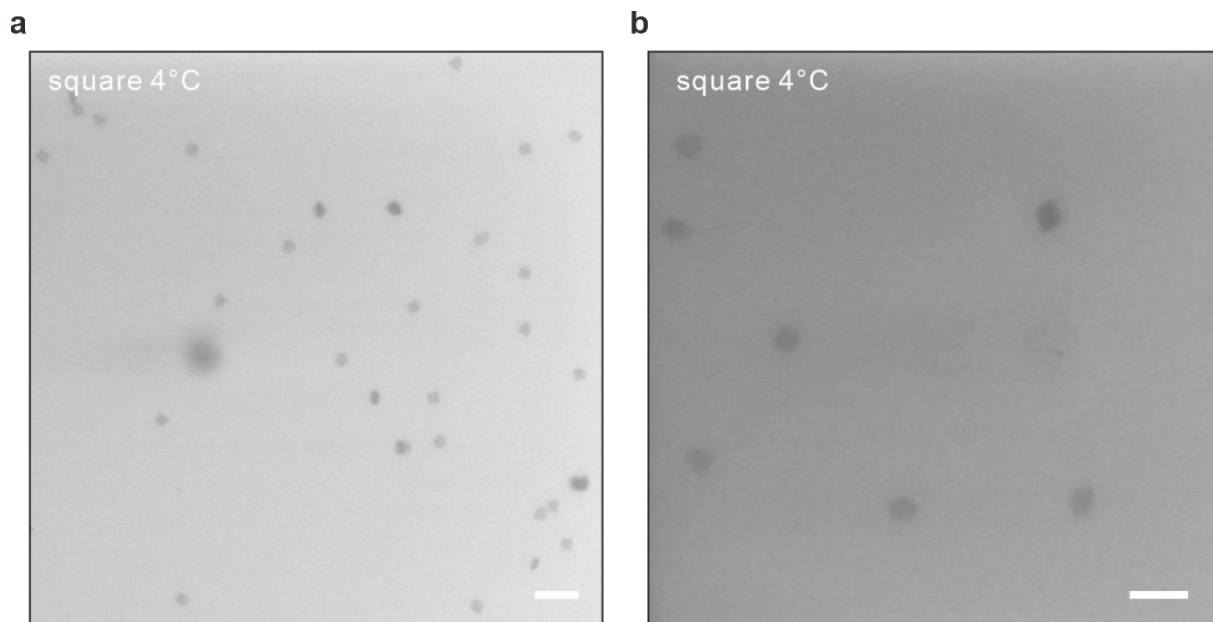

**Supplementary Fig. 13. SEM images of square DNA origami after silicification at 4 °C. (a, b) Images at different magnifications. Scale bar, 300 nm and 200 nm.**

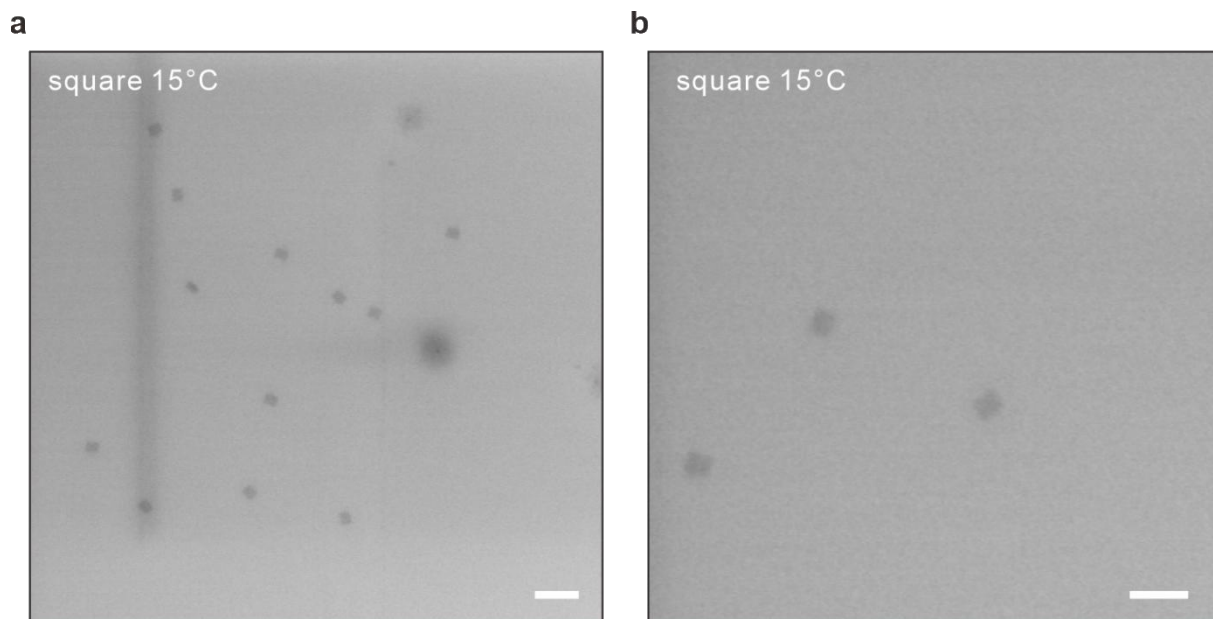

**Supplementary Fig. 14. SEM images of square DNA origami after silicification at 15 °C. (a, b) Images at different magnifications. Scale bar, 300 nm and 200 nm.**

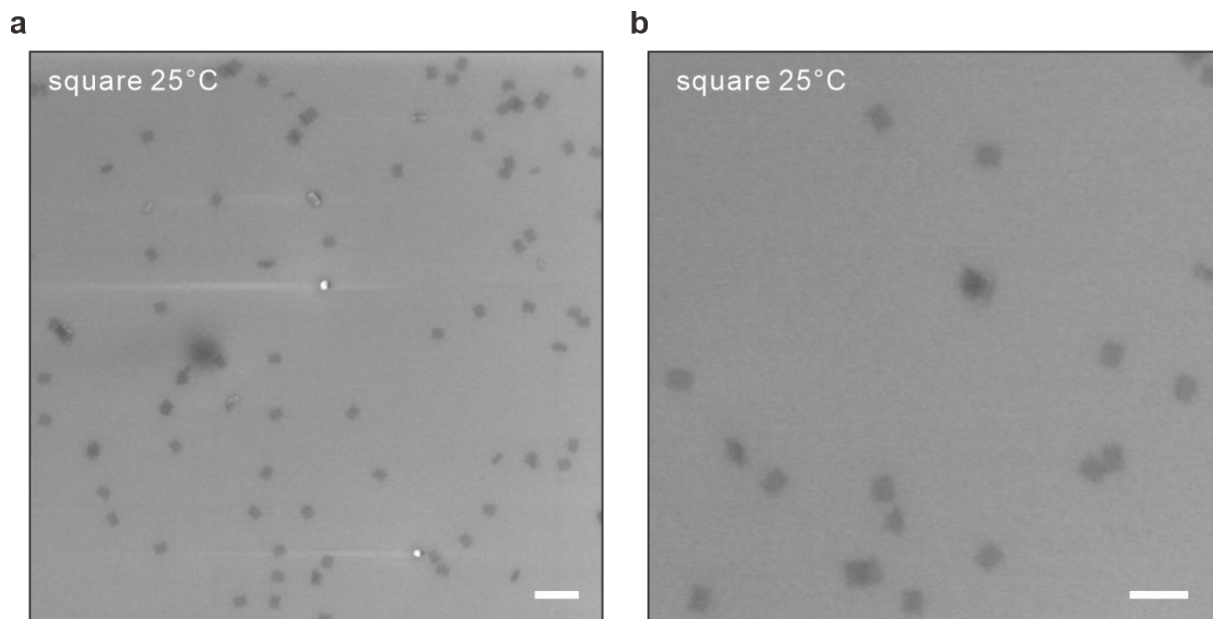

**Supplementary Fig. 15. SEM images of square DNA origami after silicification at 25 °C. (a, b) Images at different magnifications. Scale bar, 300 nm and 200 nm.**

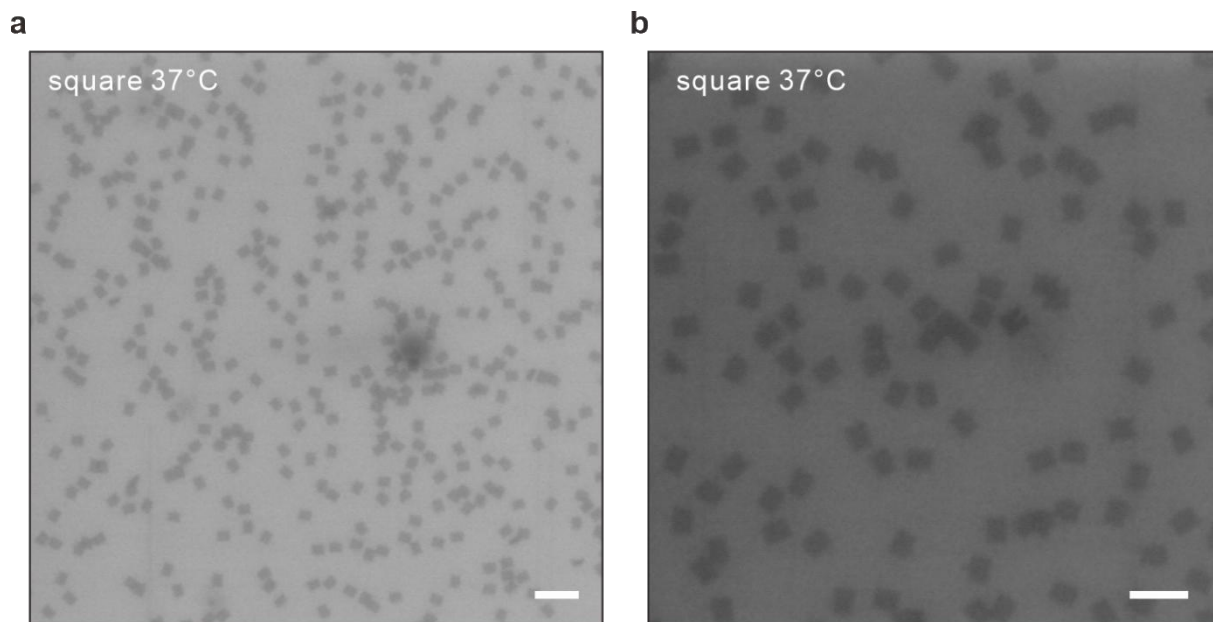

**Supplementary Fig. 16. SEM images of square DNA origami after silicification at 37 °C. (a, b) Images at different magnifications. Scale bar, 300 nm and 200 nm.**

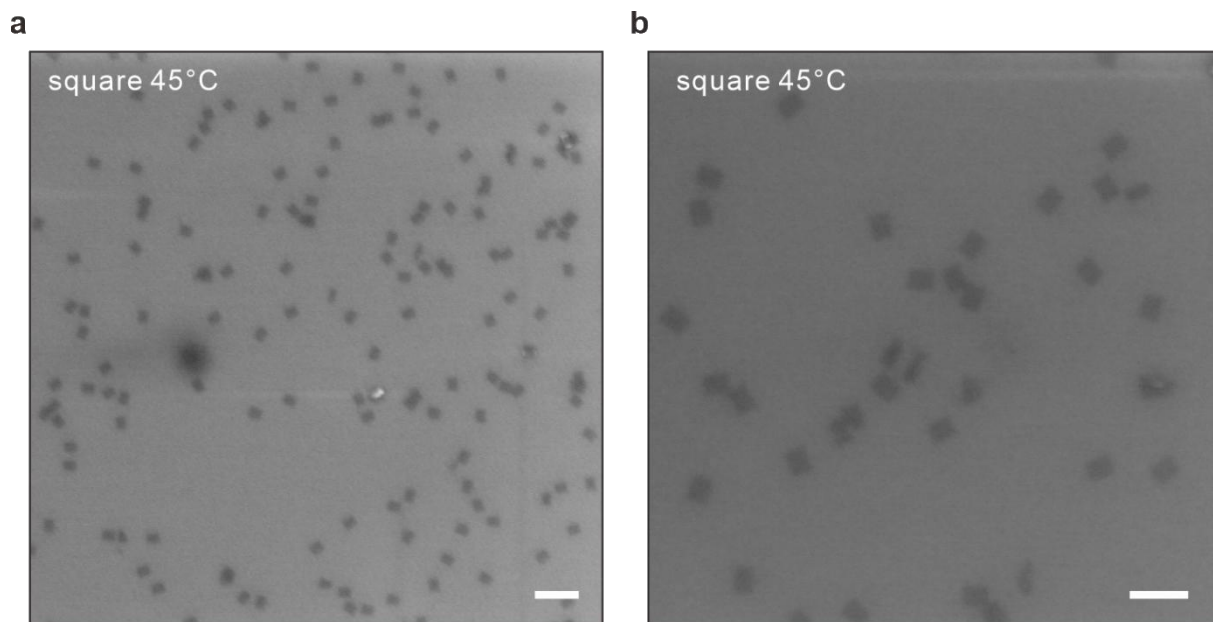

**Supplementary Fig. 17. SEM images of square DNA origami after silicification at 45 °C. (a, b) Images at different magnifications. Scale bar, 300 nm and 200 nm.**

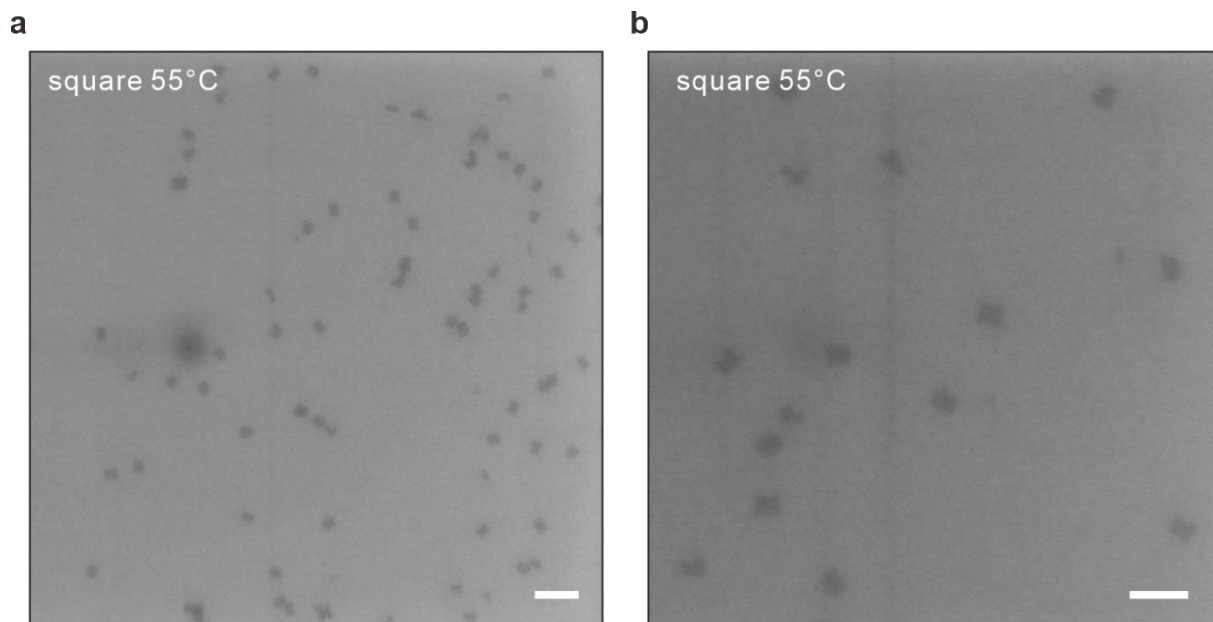

**Supplementary Fig. 18. SEM images of square DNA origami after silicification at 55 °C. (a, b) Images at different magnifications. Scale bar, 300 nm and 200 nm.**

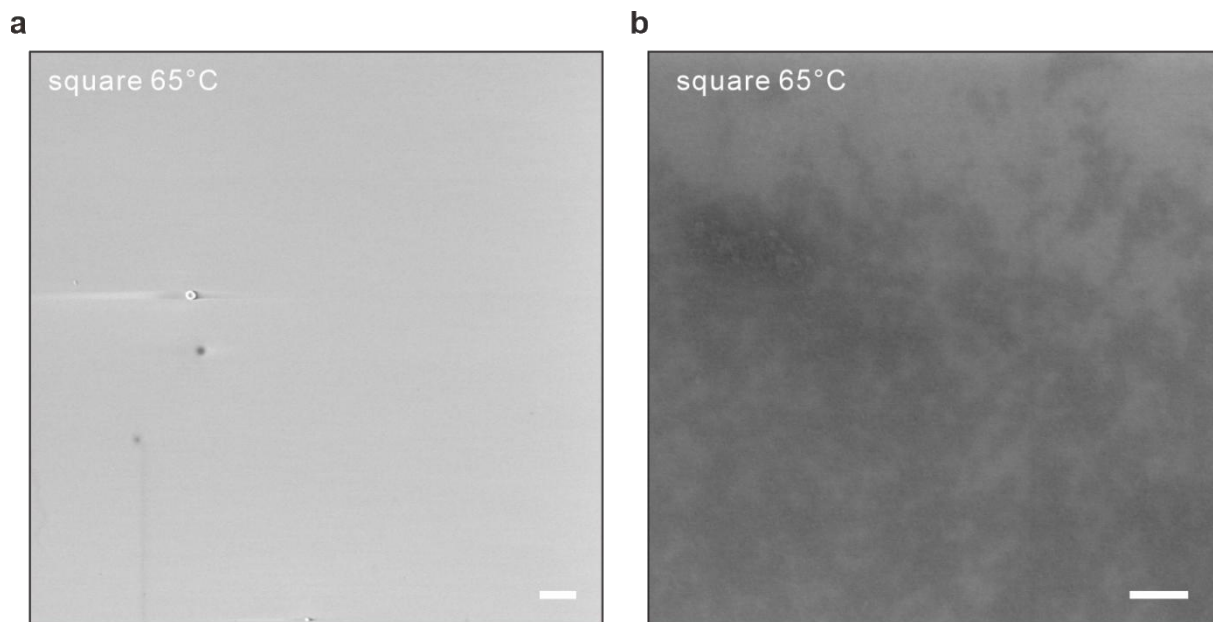

**Supplementary Fig. 19. SEM images of square DNA origami after silicification at 65 °C. (a, b) Images at different magnifications. Scale bar, 1 μm and 200 nm.**

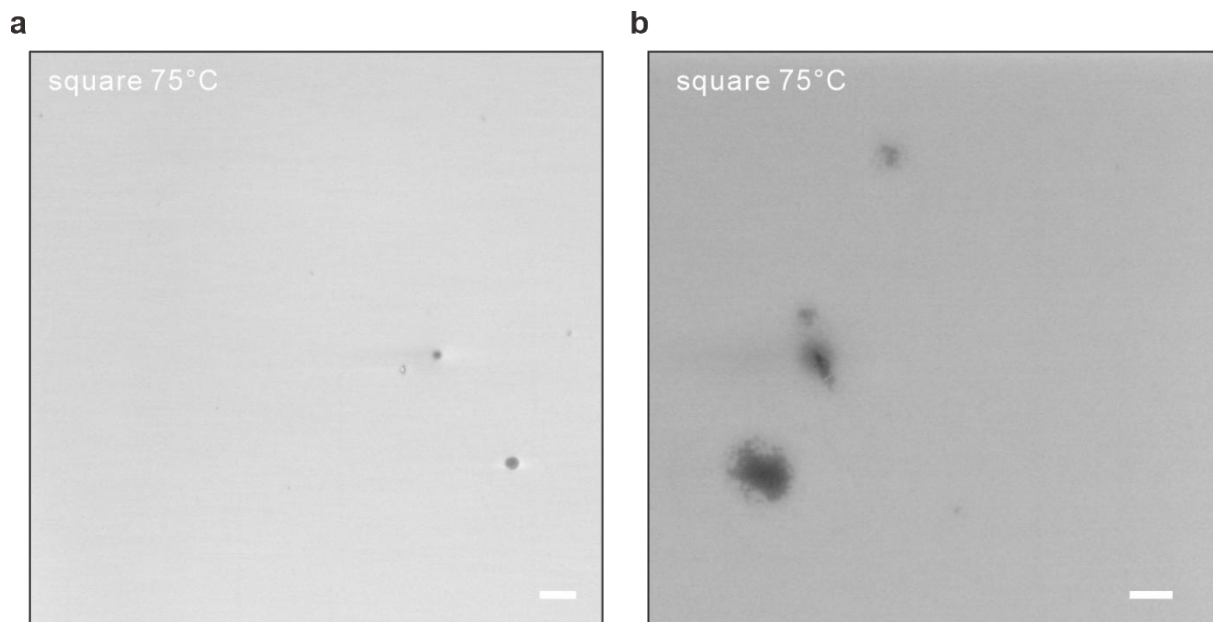

**Supplementary Fig. 20. SEM images of square DNA origami after silicification at 75 °C. (a, b) Images at different magnifications. Scale bar, 1  $\mu\text{m}$  and 300 nm.**

## 5 The quantitative analysis of square DNA origami from air-AFM images

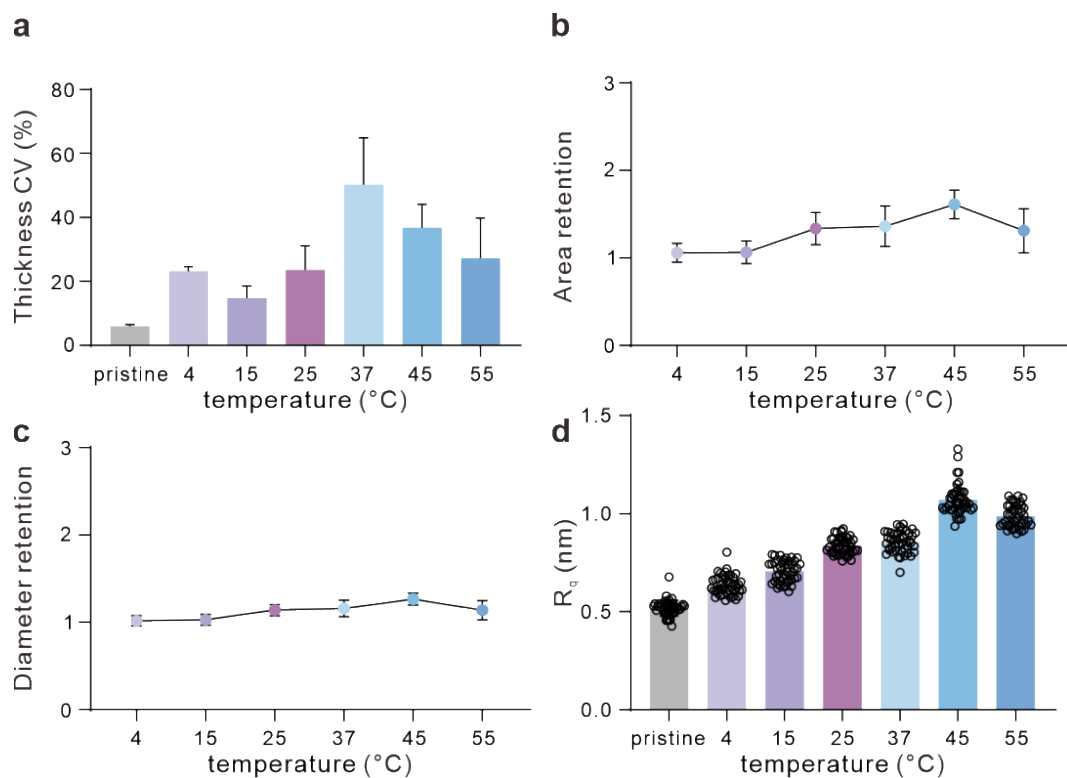

**Supplementary Fig. 21. AFM-based quantitative analysis of pristine square DNA origami (SDO) and silicified structures at different temperatures.** Thickness coefficient of variation (Thickness CV, %) (a), Area retention (b), Diameter retention (c) and Root mean square roughness ( $R_q$ ) (d) of silicified SDO as a function of temperature. Data are presented as mean  $\pm$  standard deviation (mean  $\pm$  SD).

## 6 Temperature-dependent zeta-potential distributions of SDO

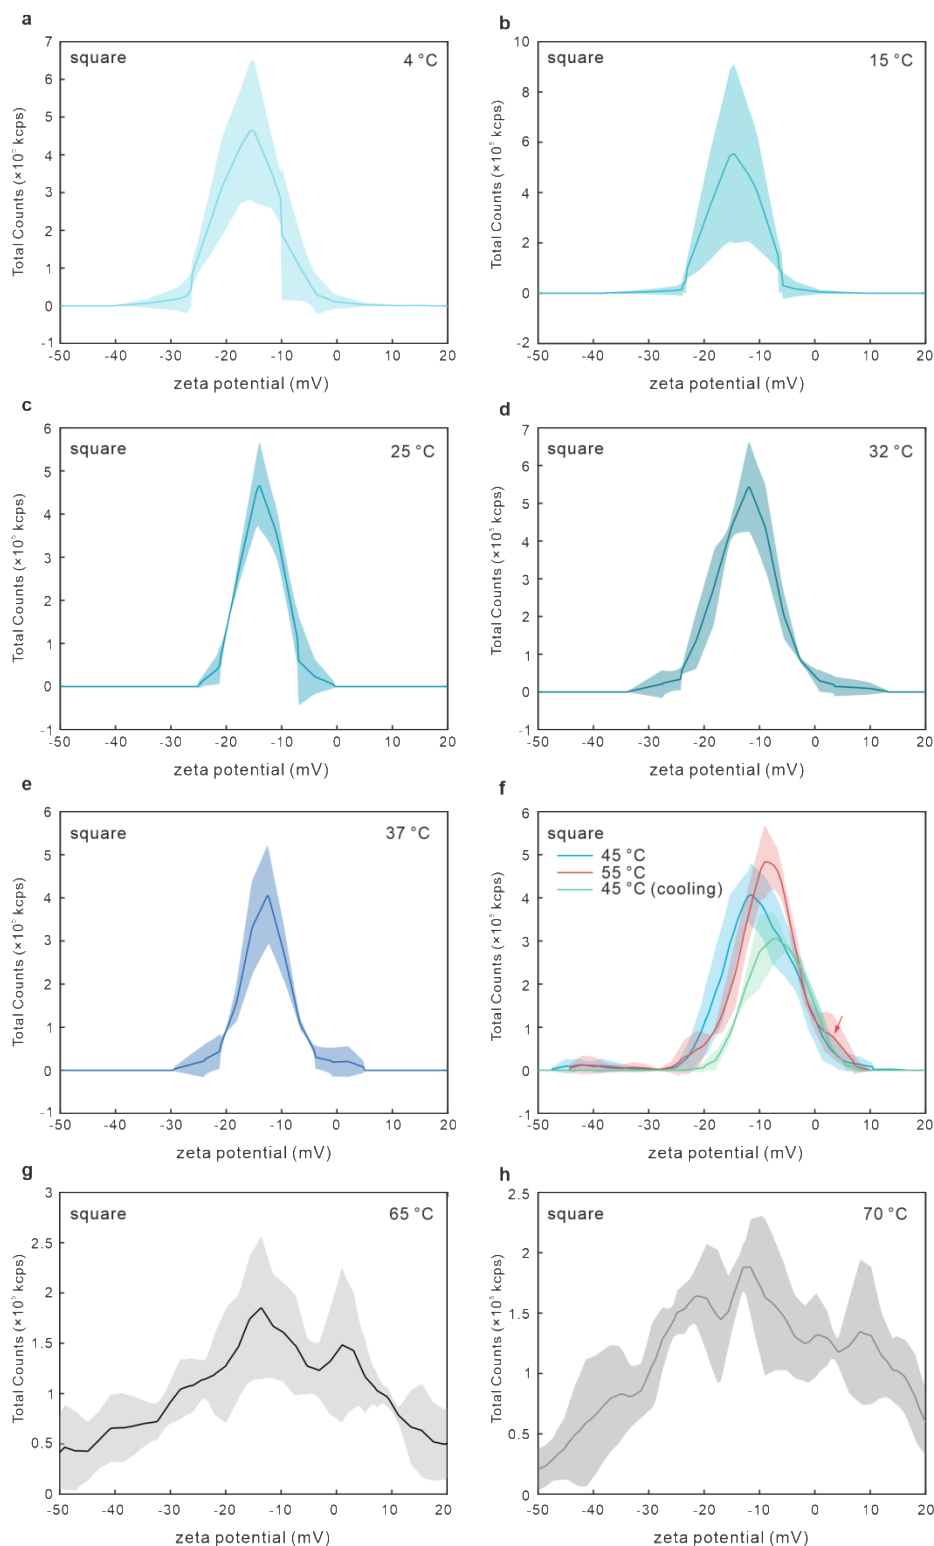

**Supplementary Fig. 22. Zeta potential distributions of pristine square DNA origami measured at different temperatures. (a) 4 °C, (b) 15 °C, (c) 25 °C, (d) 32 °C, (e) 37 °C, (f) during a heating–cooling cycle (45 °C to 55 °C to 45 °C), (g) 65 °C, and (h) 70 °C. The line represents the mean distribution and the shaded area denotes the standard deviation from repeated three measurements.**

## 7 Agarose gel electrophoresis characterization of DNA origami nanostructures

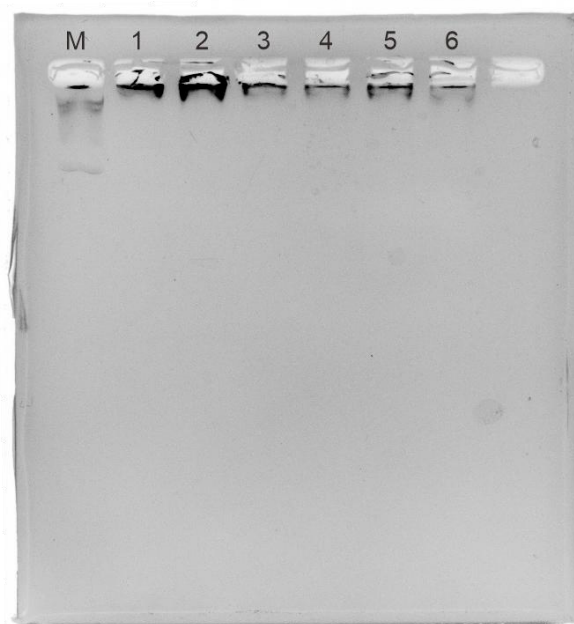

**Supplementary Fig. 23. 1% Agarose gel electrophoresis analysis of Triangular DNA origami (TDO).** Representative agarose gel electrophoresis of purified Triangular DNA origami after silicification at different silicification reaction temperatures. Lanes from left to right correspond to 1kb DNA ladder, pristine Triangular DNA origami (10 nM) and Triangular DNA origami (10 nM) silicification at 4, 15, 25, 37, and 45 °C, respectively.

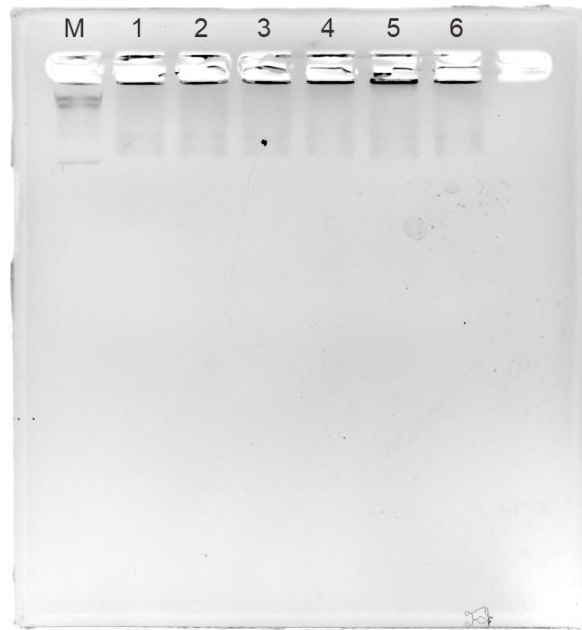

**Supplementary Fig. 24. 1% Agarose gel electrophoresis analysis of ring-shaped DNA origami (RDO).** Representative agarose gel electrophoresis of purified ring-shaped DNA origami after silicification at different silicification reaction temperatures. Lanes from left to right correspond to 1kb DNA ladder, pristine ring-shaped DNA origami (10 nM) and ring-shaped DNA origami (10 nM) silicification at 4, 15, 25, 37, and 45 °C, respectively.

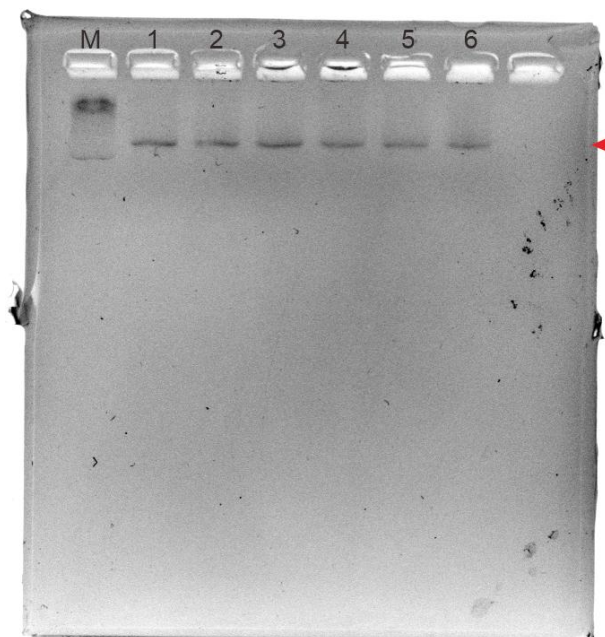

**Supplementary Fig. 25. 1% Agarose gel electrophoresis analysis of 14-helix bundle DNA origami (14HB).** Representative agarose gel electrophoresis of purified 14-helix bundle DNA origami after silicification at different silicification reaction temperatures. Lanes from left to right correspond to 1kb DNA ladder, pristine 14-helix bundle DNA origami (10 nM) and 14-helix bundle DNA origami (10 nM) silicification at 4, 15, 25, 37, and 45 °C, respectively. The red arrows indicated the corresponding electrophoretic band of the target products.

## 8 AFM imaging of DNA origami nanostructures under air- and liquid-phase conditions

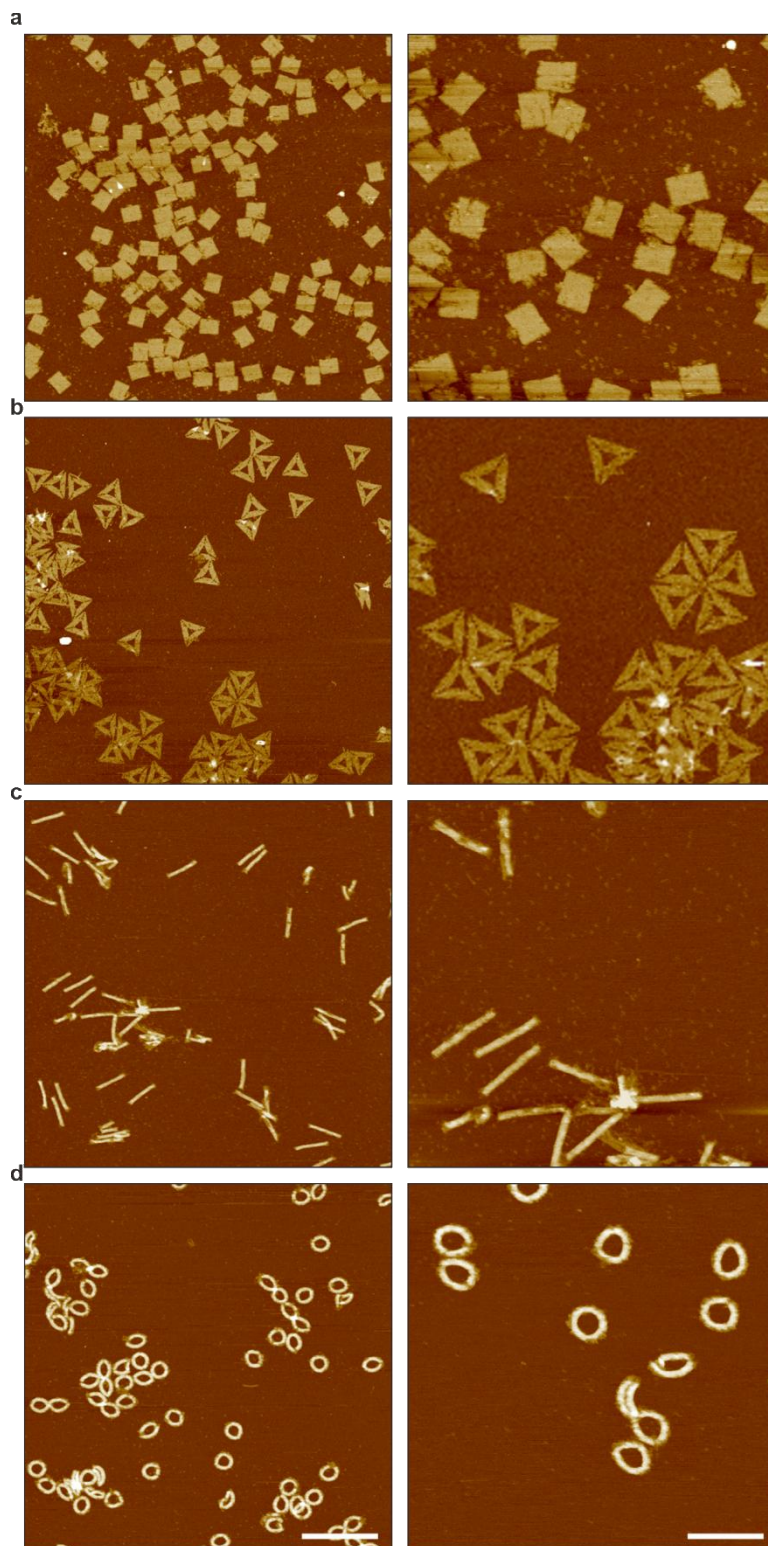

**Supplementary Fig. 26.** Liquid-phase AFM images of DNA origami nanostructures. Square (a), Triangular (b), 14-helix bundle (c), and ring (d) shapes. Left and Right panels show different magnifications with scale bars of 400 nm and 200 nm, respectively. All images were obtained under liquid conditions to preserve the native conformations of the DNA origamis.

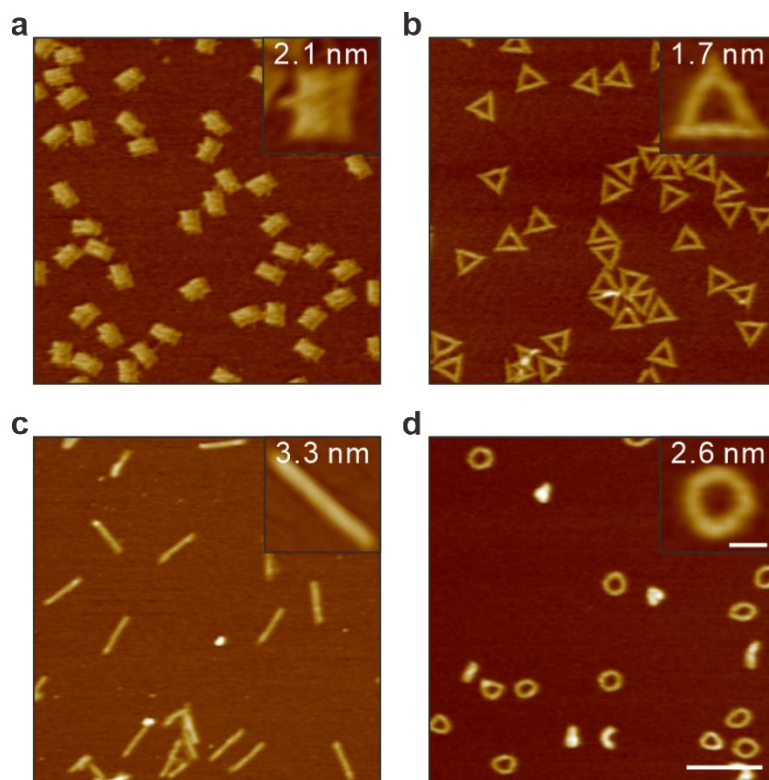

**Supplementary Fig. 27. The morphology and height characteristics of different DNA origami architectures in air-phase AFM.** Air-phase AFM images of the square (a), triangle (b), 14HB (c) and ring (d) structures (scale bar, 300 nm), the inset shows a representative DNA origami with annotated average height (scale bar, 50 nm).

## 9 Temperature-dependent zeta-potential distributions of DNA origami nanostructures

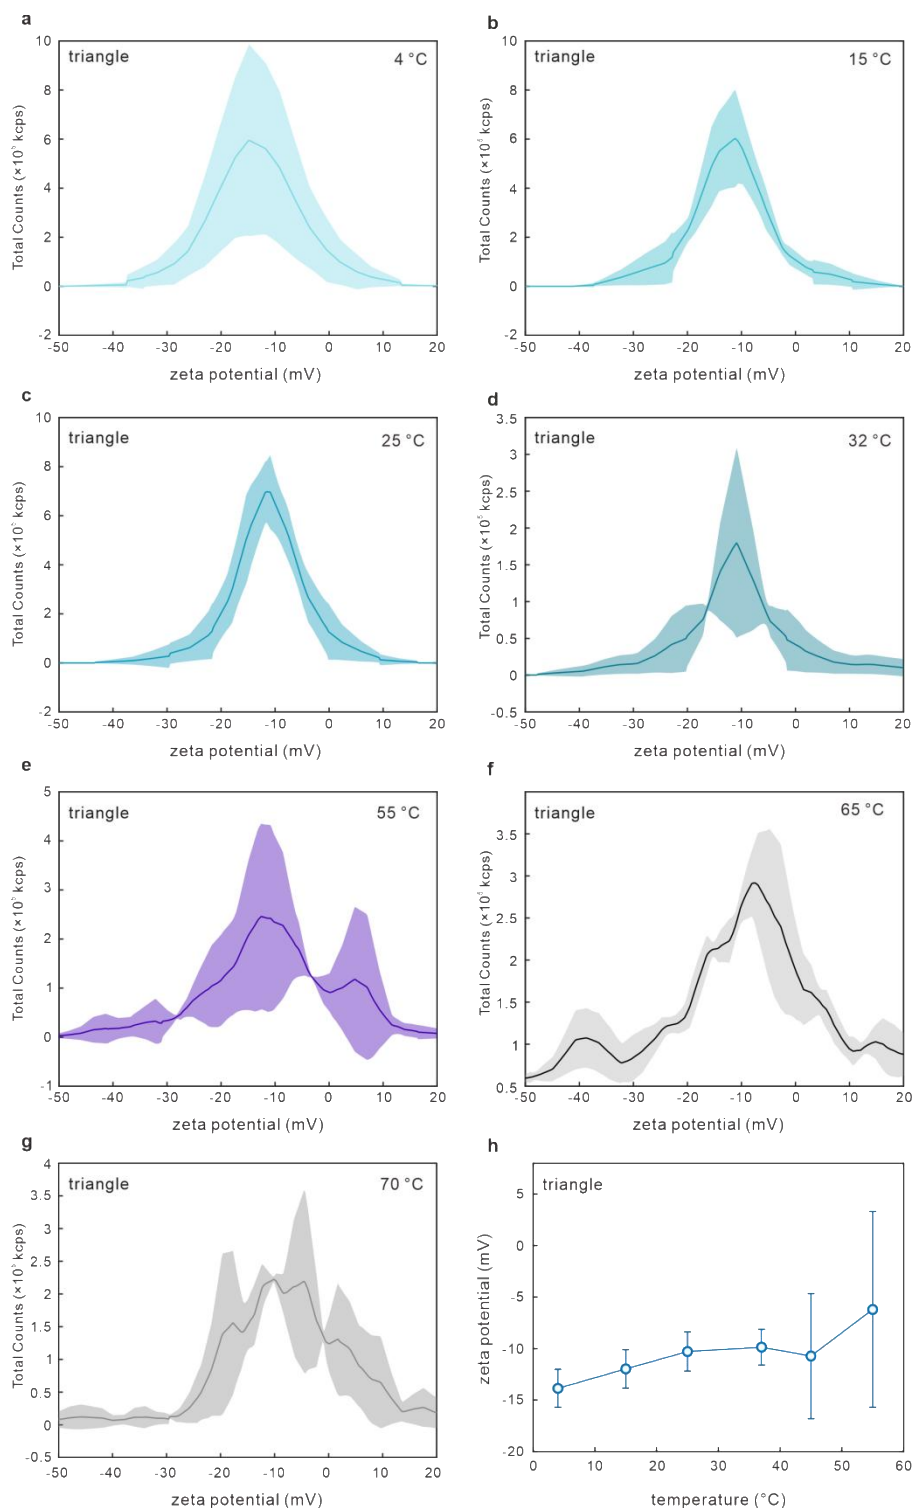

**Supplementary Fig. 28. Zeta potential distributions of pristine triangular DNA origamis measured at different temperatures, and the temperature dependence of the peak zeta-potential. (a) 4 °C, (b) 15 °C, (c) 25 °C, (d) 32 °C, (e) 55 °C, (f) 65 °C, (g) 70 °C, and Peak zeta-potential of TDO increases with temperature from 4 °C to 55 °C (h). The line represents the mean distribution and the shaded area denotes the standard deviation from repeated three measurements.**

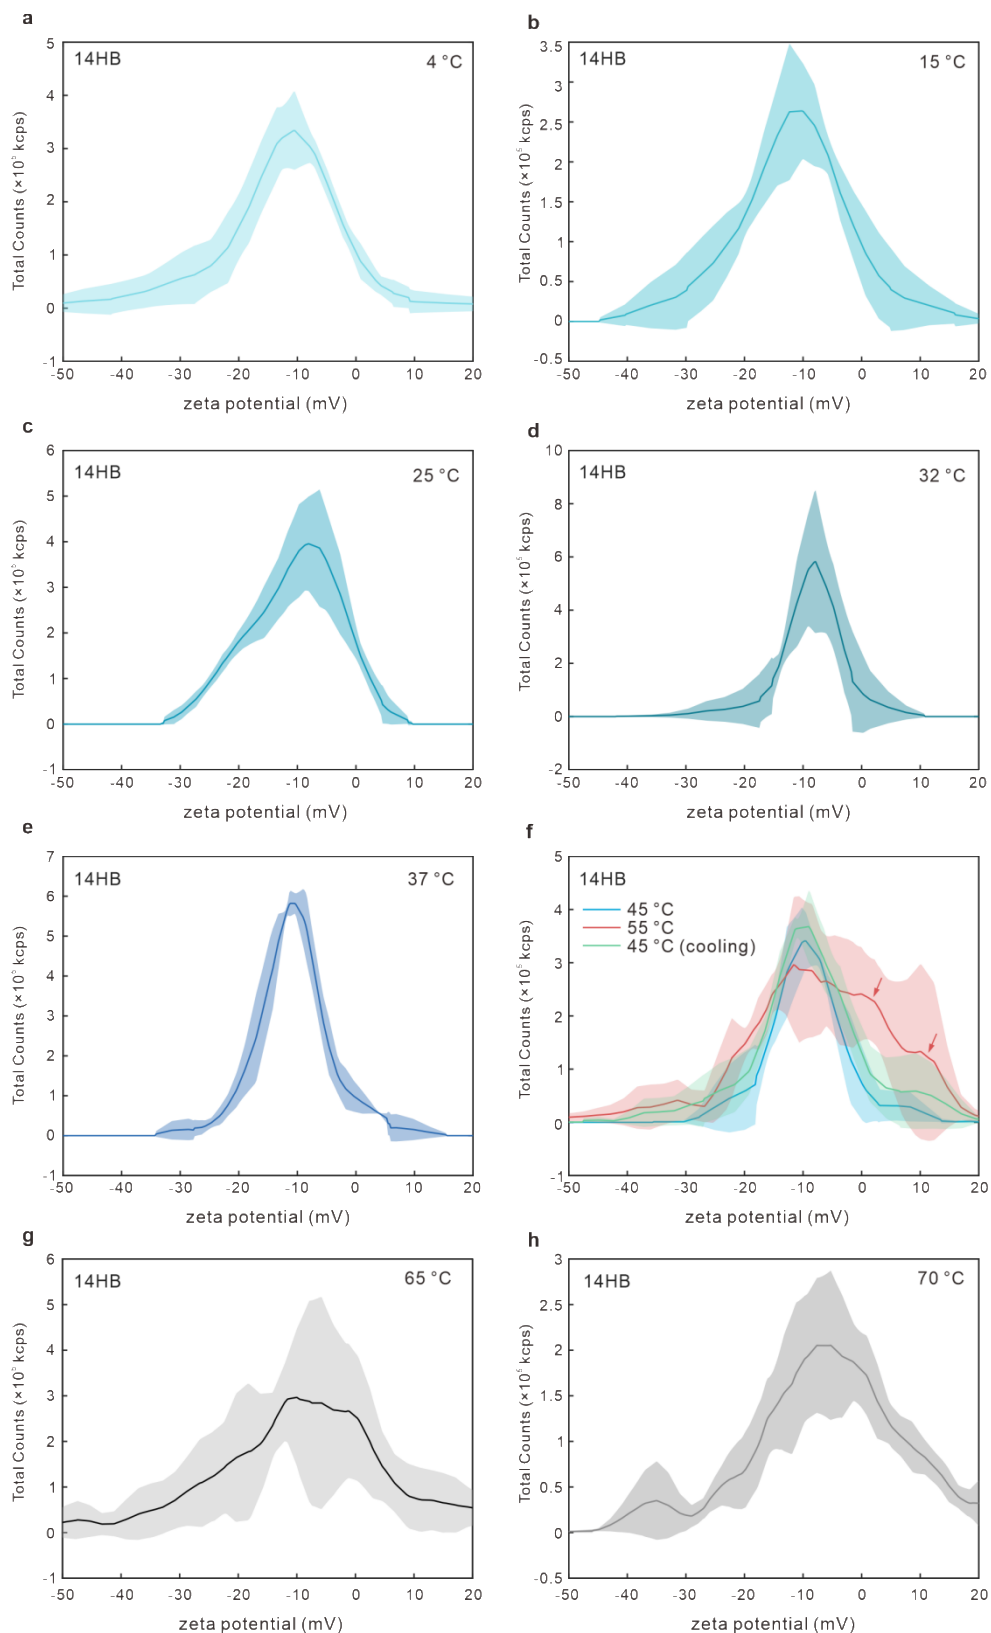

**Supplementary Fig. 29. Zeta potential distributions of pristine 14-helix bundle DNA origami measured at different temperatures. (a) 4 °C, (b) 15 °C, (c) 25 °C, (d) 32 °C, (e) 37 °C, (f) during a heating–cooling cycle (45 °C to 55 °C to 45 °C), (g) 65 °C, and (h) 70 °C. The line represents the mean distribution and the shaded area denotes the standard deviation from repeated three measurements.**

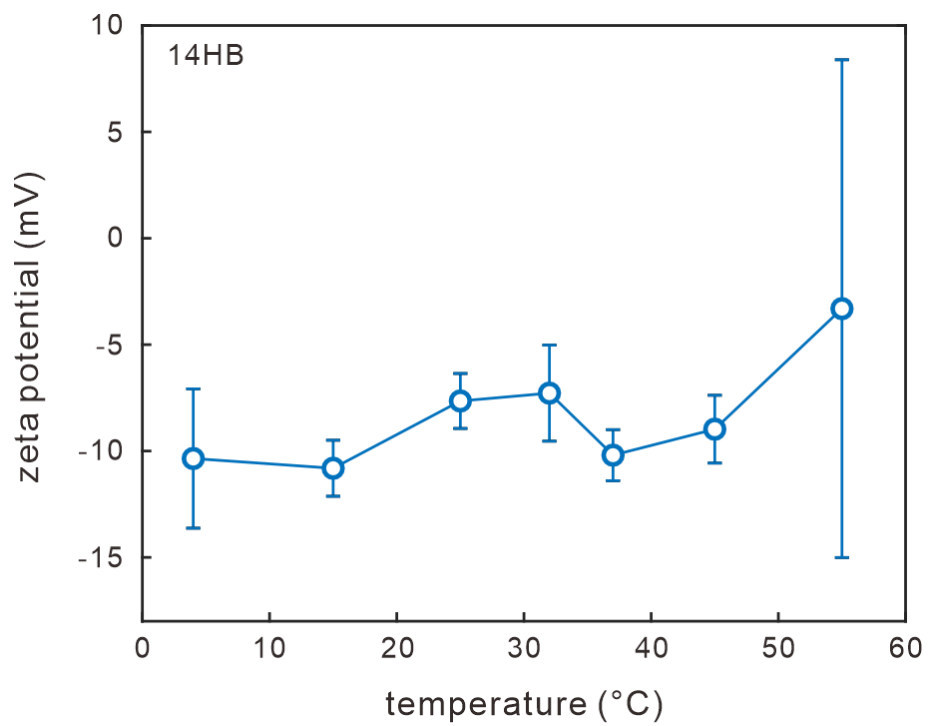

**Supplementary Fig. 30. The temperature dependence of the peak zeta-potential.** Peak zeta-potential of **pristine** 14HB increases with temperature from 4 °C to 55 °C.

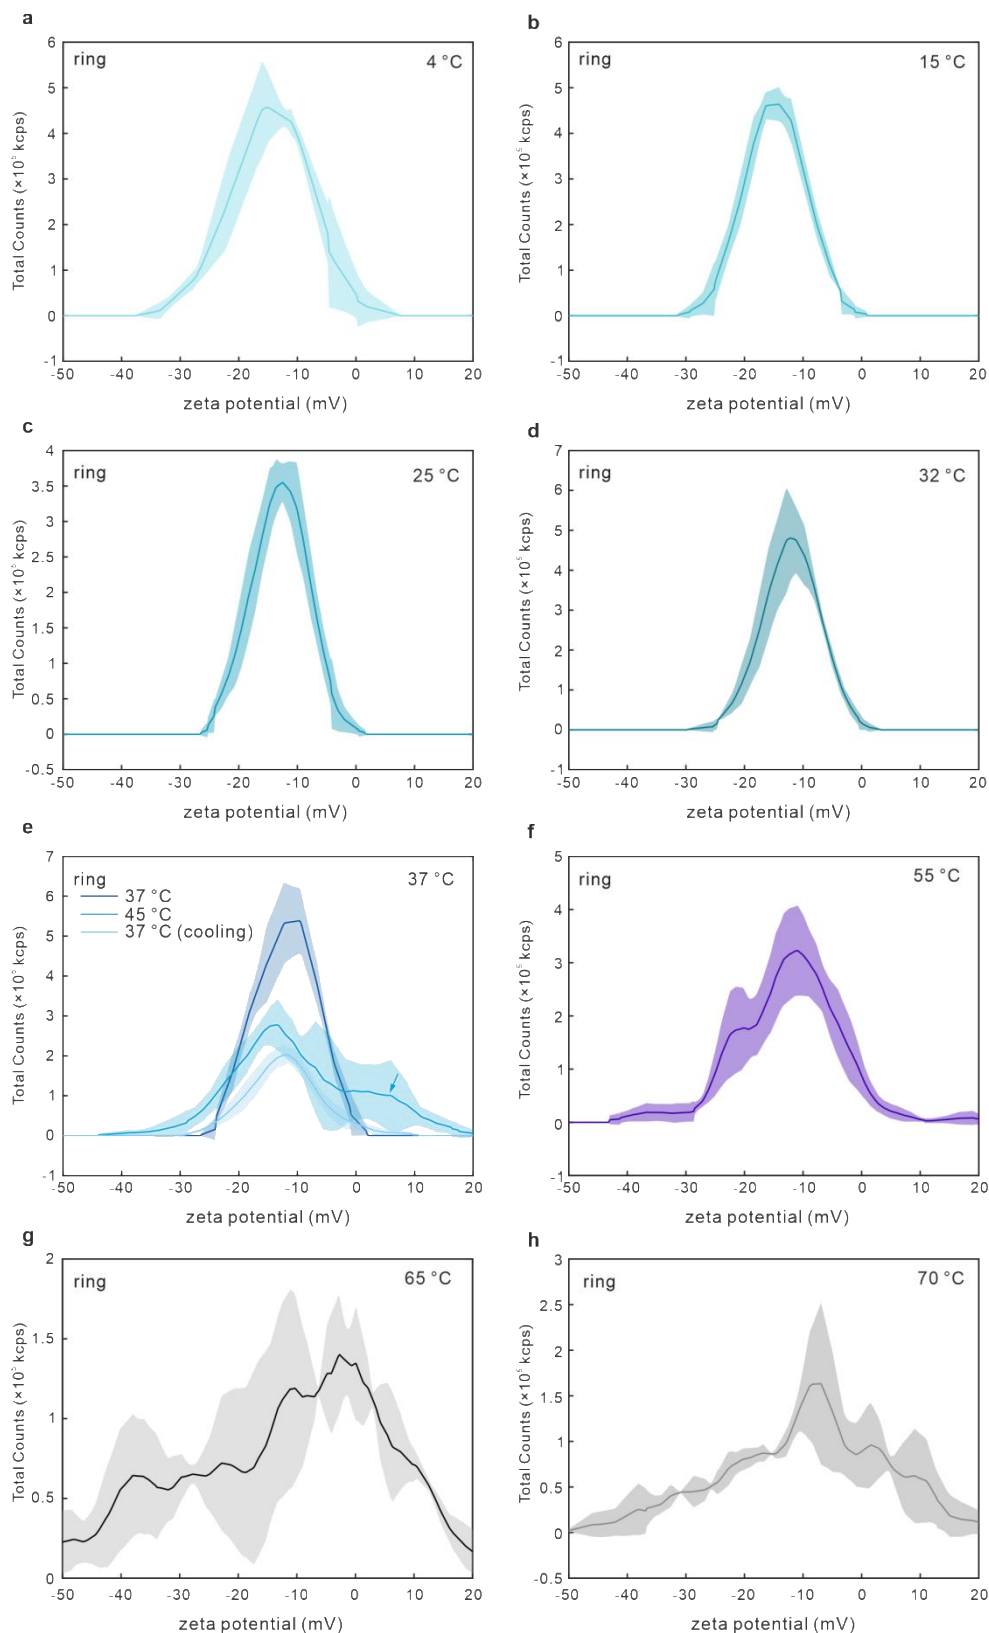

**Supplementary Fig. 31. Zeta potential distributions of pristine ring-shaped DNA origami measured at different temperatures.** (a) 4 °C, (b) 15 °C, (c) 25 °C, (d) 32 °C, (e) during a heating–cooling cycle (37 °C to 45 °C to 37 °C), (f) 55 °C, (g) 65 °C, and (h) 70 °C. The line represents the mean distribution and the shaded area denotes the standard deviation from repeated three measurements.

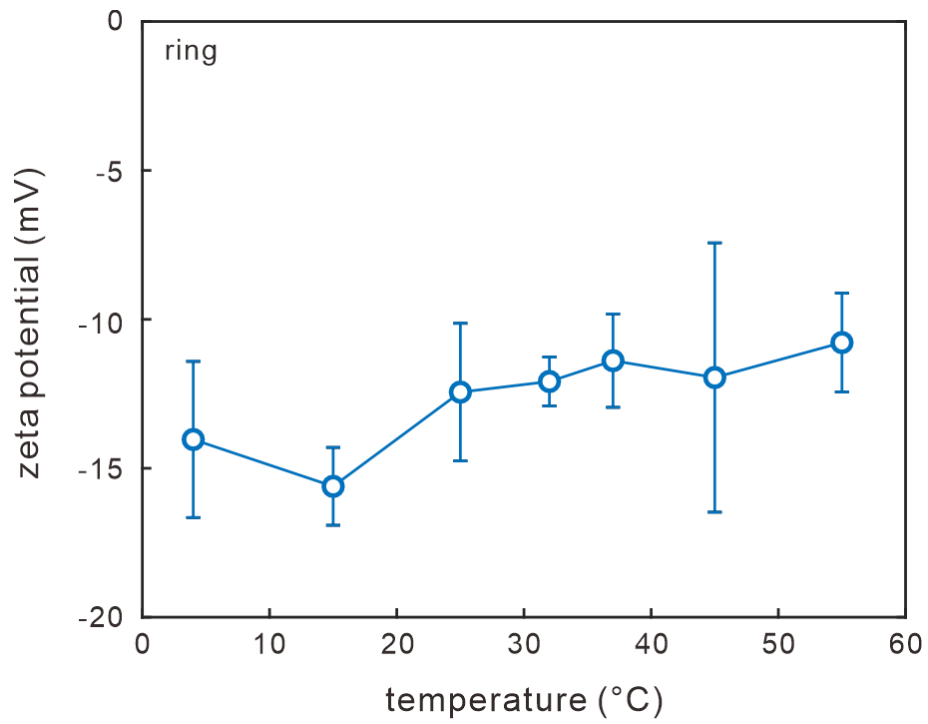

**Supplementary Fig. 32. The temperature dependence of the peak zeta-potential.** Peak zeta-potential of **pristine** RDO increases with temperature from 4 °C to 55 °C.

## 10 SEM images of pristine DNA origami and after silicification at different temperatures

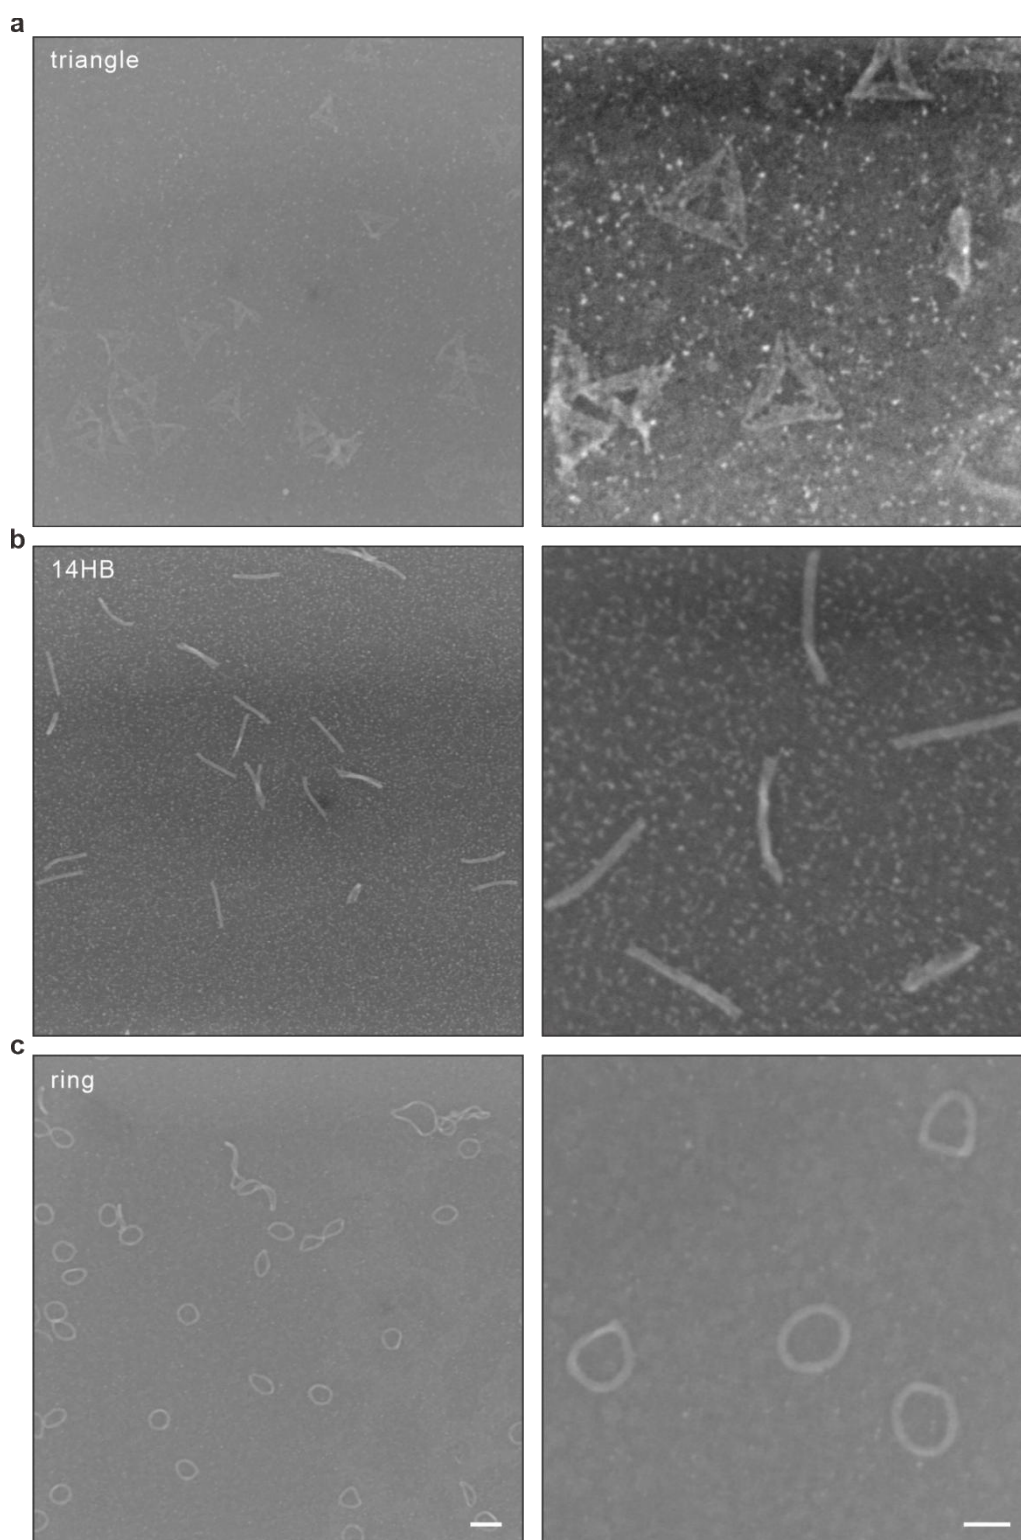

**Supplementary Fig. 33. SEM images of pristine DNA origami nanostructures.** Triangular (a), 14-helix bundle (b), and ring (c) shapes. Samples were stained with uranyl acetate prior to imaging to enhance contrast. Scale bars, 100 nm.

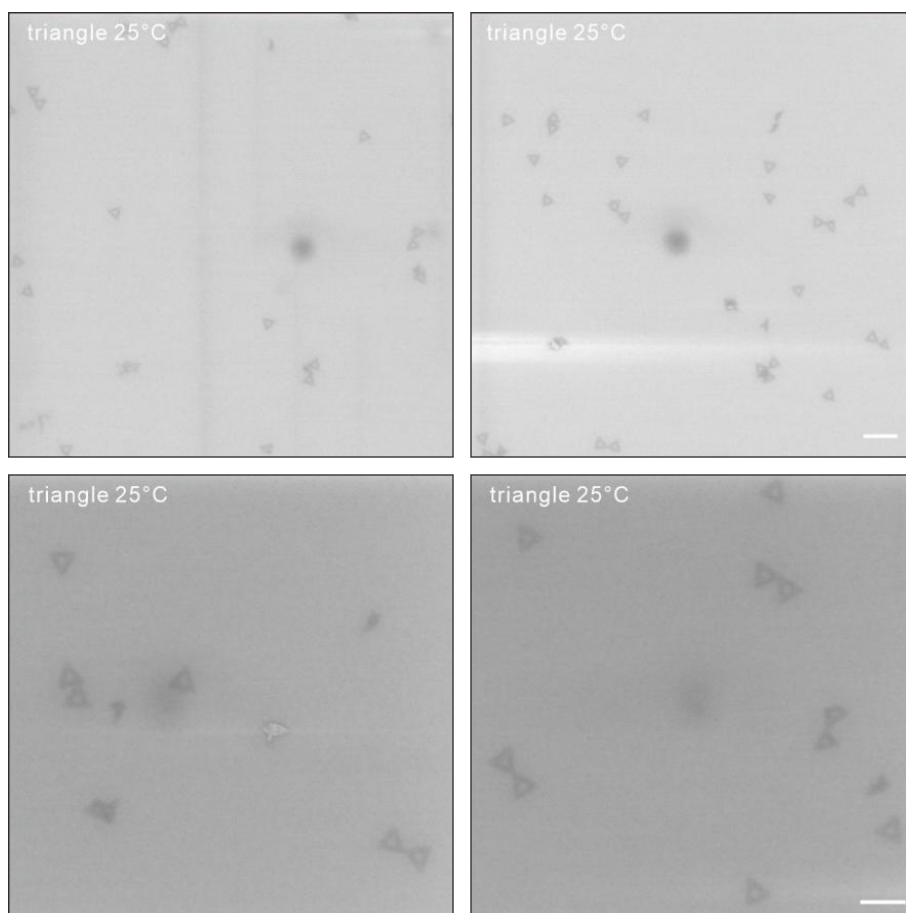

**Supplementary Fig. 34. SEM image of Triangular DNA origami after silicification at 25 °C.** The sample was silicified to form a conformal silica coating while preserving the original DNA origami structure. Scale bar, 300 nm and 200 nm.

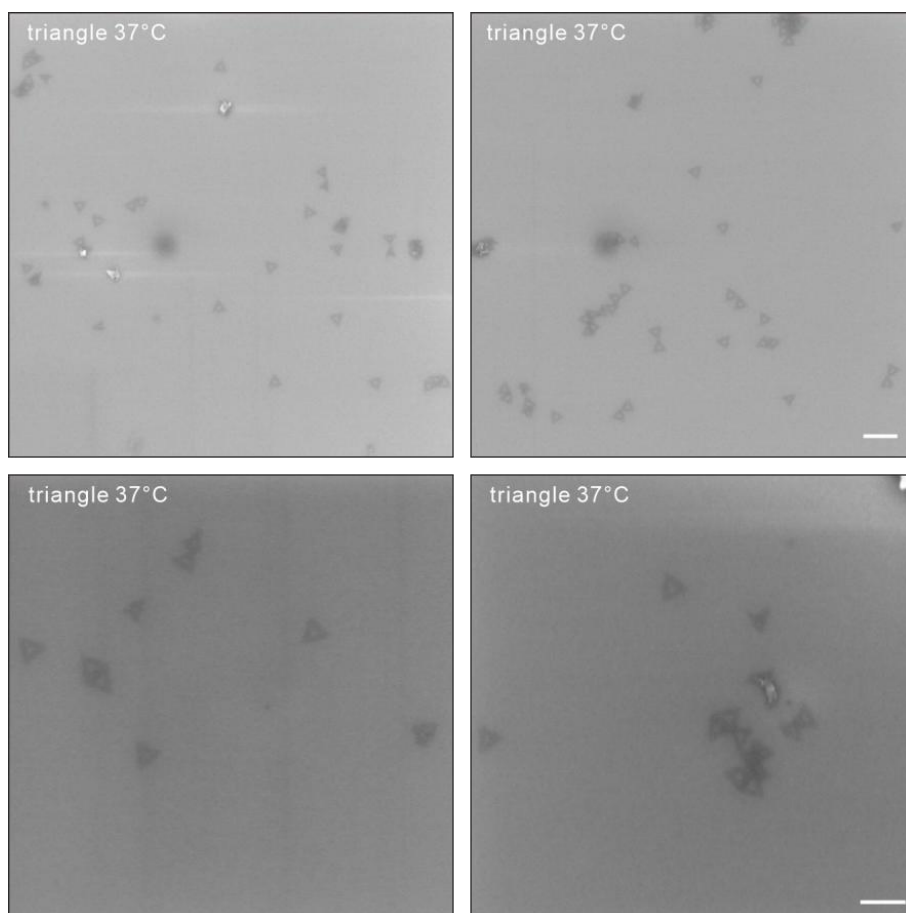

**Supplementary Fig. 35. SEM image of Triangular DNA origami after silicification at 37 °C.** The sample was silicified to form a conformal silica coating while preserving the original DNA origami structure. Scale bar, 300 nm and 200 nm.

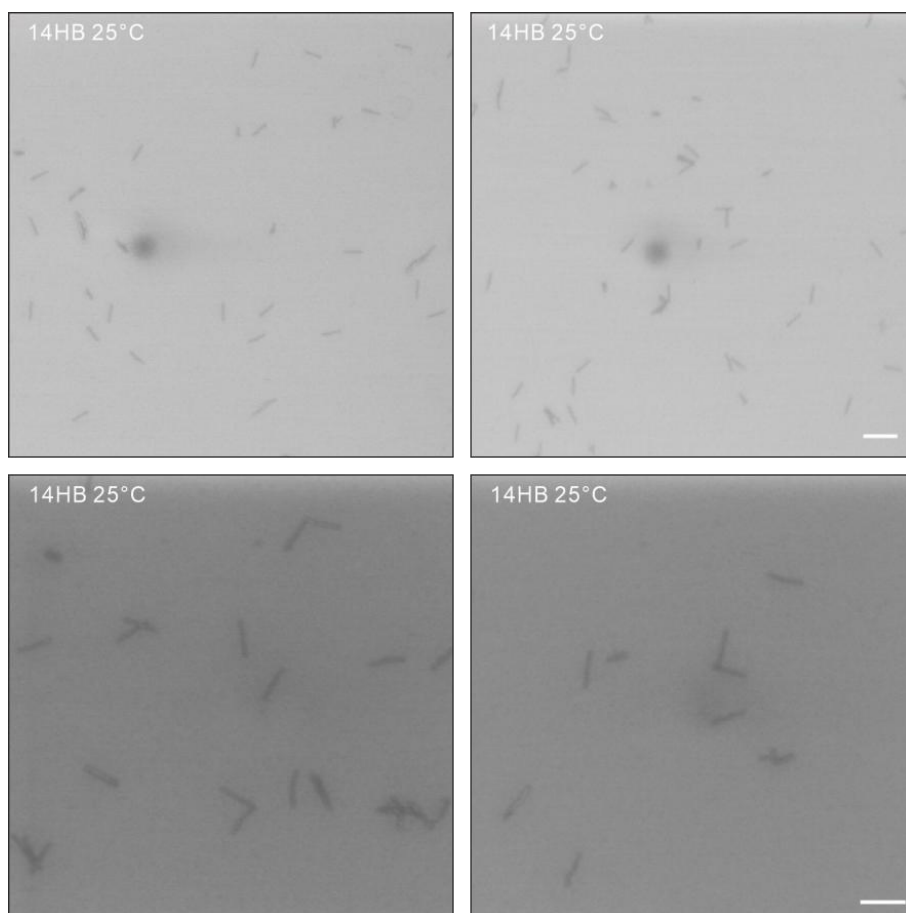

**Supplementary Fig. 36. SEM image of 14 helix bundle DNA origami after silicification at 25 °C.** The sample was silicified to form a conformal silica coating while preserving the original DNA origami structure. Scale bar, 300 nm and 200 nm.

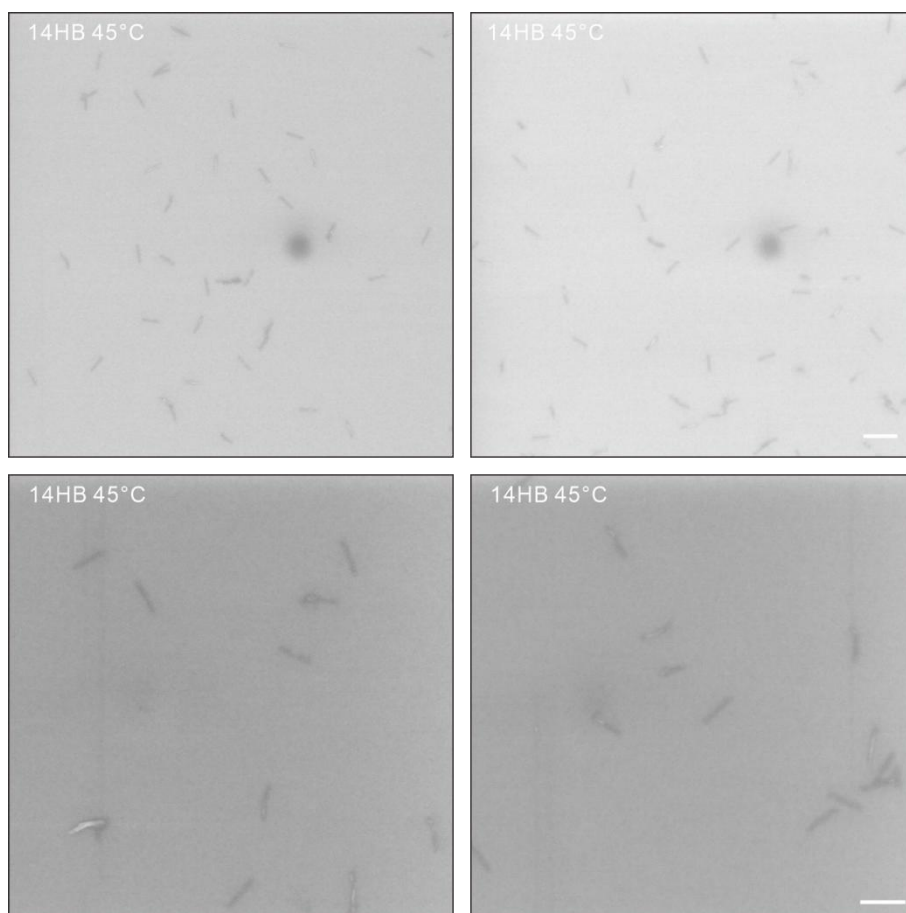

**Supplementary Fig. 37. SEM image of 14 helix bundle DNA origami after silicification at 45 °C.** The sample was silicified to form a conformal silica coating while preserving the original DNA origami structure. Scale bar, 300 nm and 200 nm.

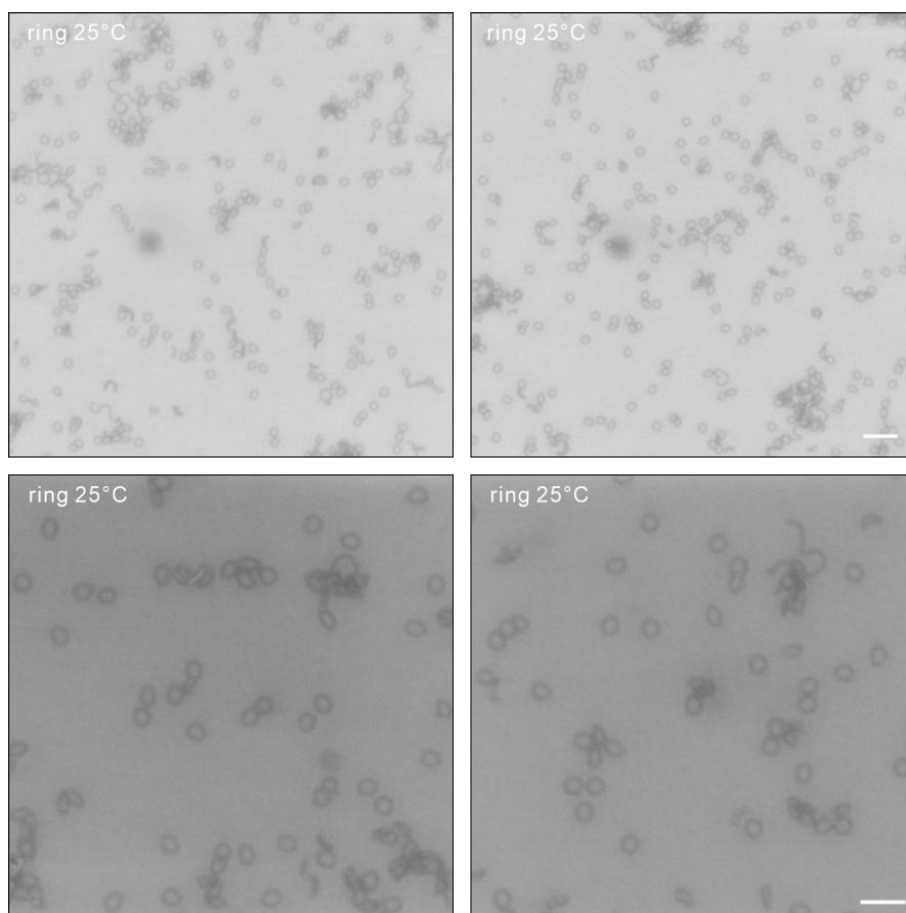

**Supplementary Fig. 38. SEM image of ring-shaped DNA origami after silicification at 25 °C.** The sample was silicified to form a conformal silica coating while preserving the original DNA origami structure. Scale bar, 300 nm and 200 nm.

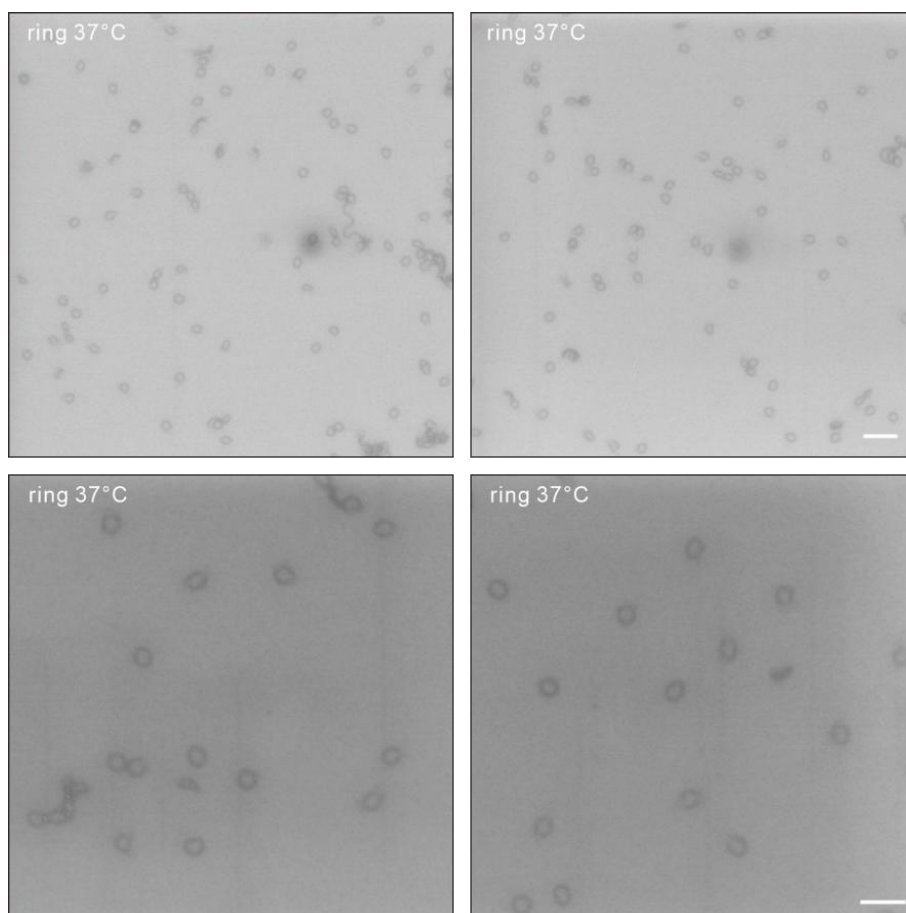

**Supplementary Fig. 39. SEM image of ring-shaped DNA origami after silicification at 37 °C.** The sample was silicified to form a conformal silica coating while preserving the original DNA origami structure. Scale bar, 300 nm and 200 nm.

## 11 The quantitative analysis of DNA origami from AFM images

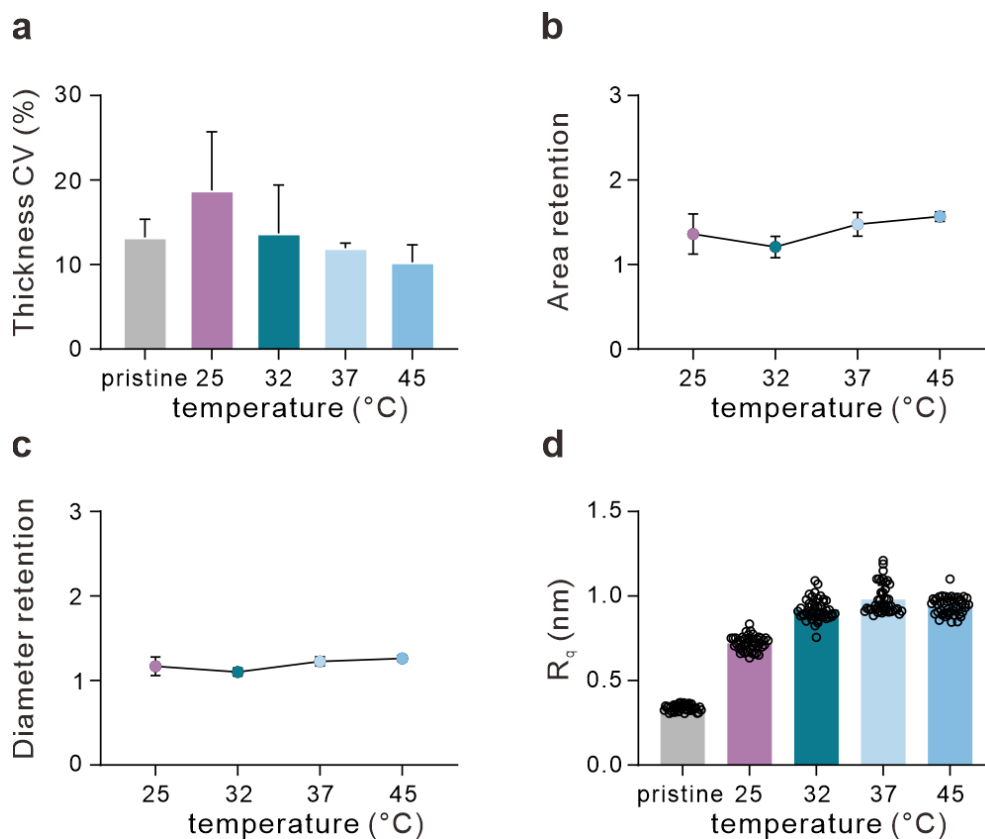

**Supplementary Fig. 40. AFM-based quantitative analysis of pristine triangular DNA origami (TDO) and silicified structures at different temperatures.** Thickness coefficient of variation (Thickness CV, %) (a), Area retention (b), Diameter retention (c) and Root mean square roughness ( $R_q$ ) (d) of silicified TDO as a function of temperature. Data are presented as mean  $\pm$  standard deviation (mean  $\pm$  SD).

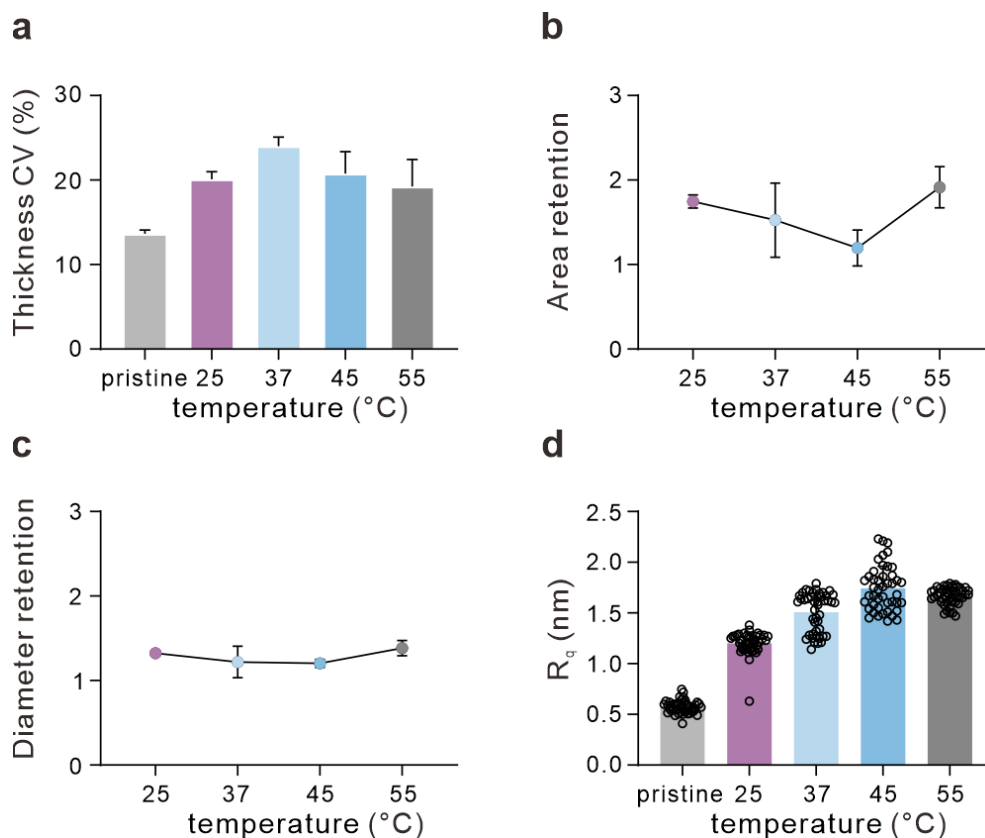

**Supplementary Fig. 41. AFM-based quantitative analysis of pristine 14-helix bundle DNA origami (14HB) and silicified structures at different temperatures.** Thickness coefficient of variation (Thickness CV, %) (a), Area retention (b), Diameter retention (c) and Root mean square roughness ( $R_q$ ) (d) of silicified 14HB as a function of temperature. Data are presented as mean  $\pm$  standard deviation (mean  $\pm$  SD).

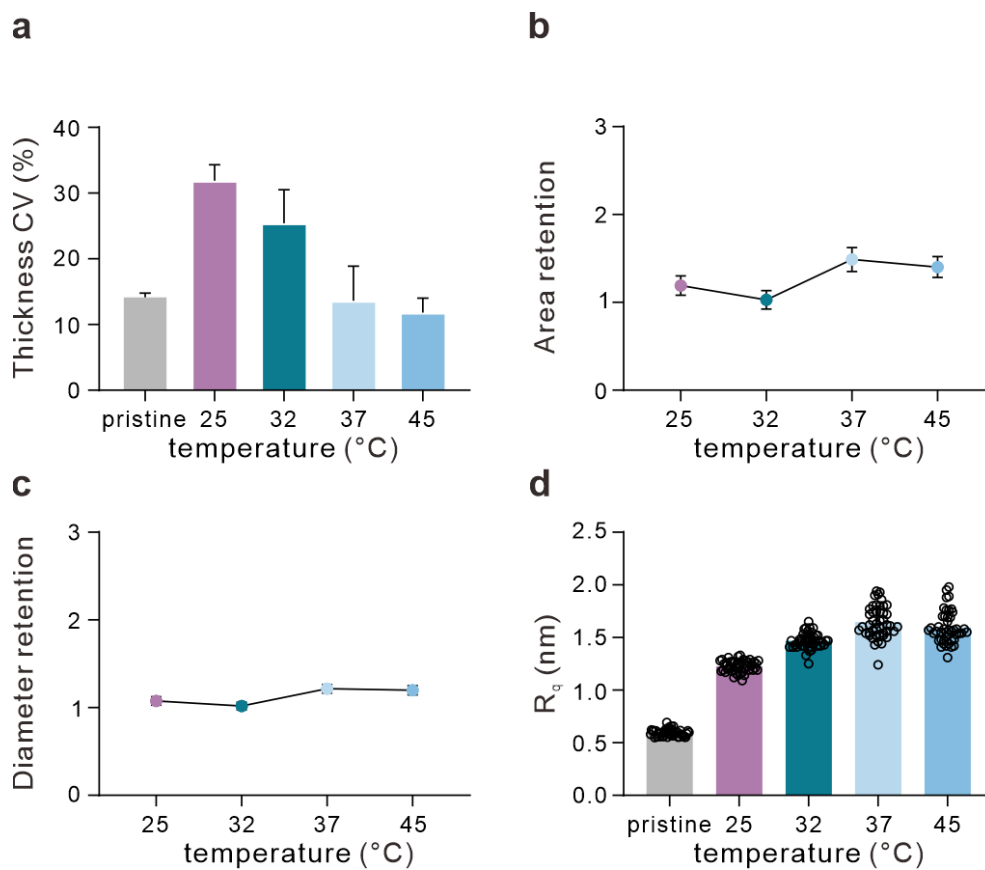

**Supplementary Fig. 42. AFM-based quantitative analysis of pristine ring-shaped DNA origami (RDO) and silicified structures at different temperatures.** Thickness coefficient of variation (Thickness CV, %) (a), Area retention (b), Diameter retention (c) and Root mean square roughness ( $R_q$ ) (d) of silicified RDO as a function of temperature. Data are presented as mean  $\pm$  standard deviation (mean  $\pm$  SD).

## 12 Molecular dynamics simulations of temperature-dependent silicification

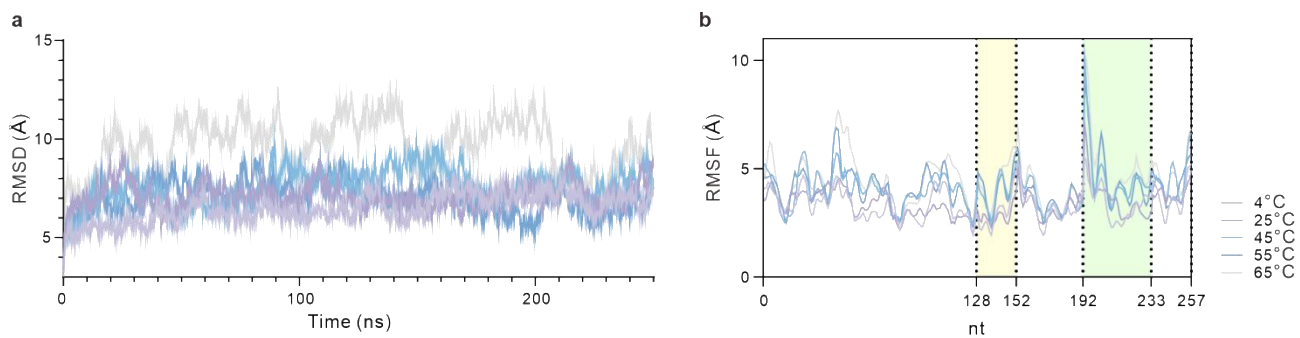

**Supplementary Fig. 43. Temperature-dependent structural dynamics of DNA origami fragment.** Root-mean-square deviation (RMSD) (a) and root-mean-square fluctuation (RMSF) (b) of DNA origami fragment at different temperatures.

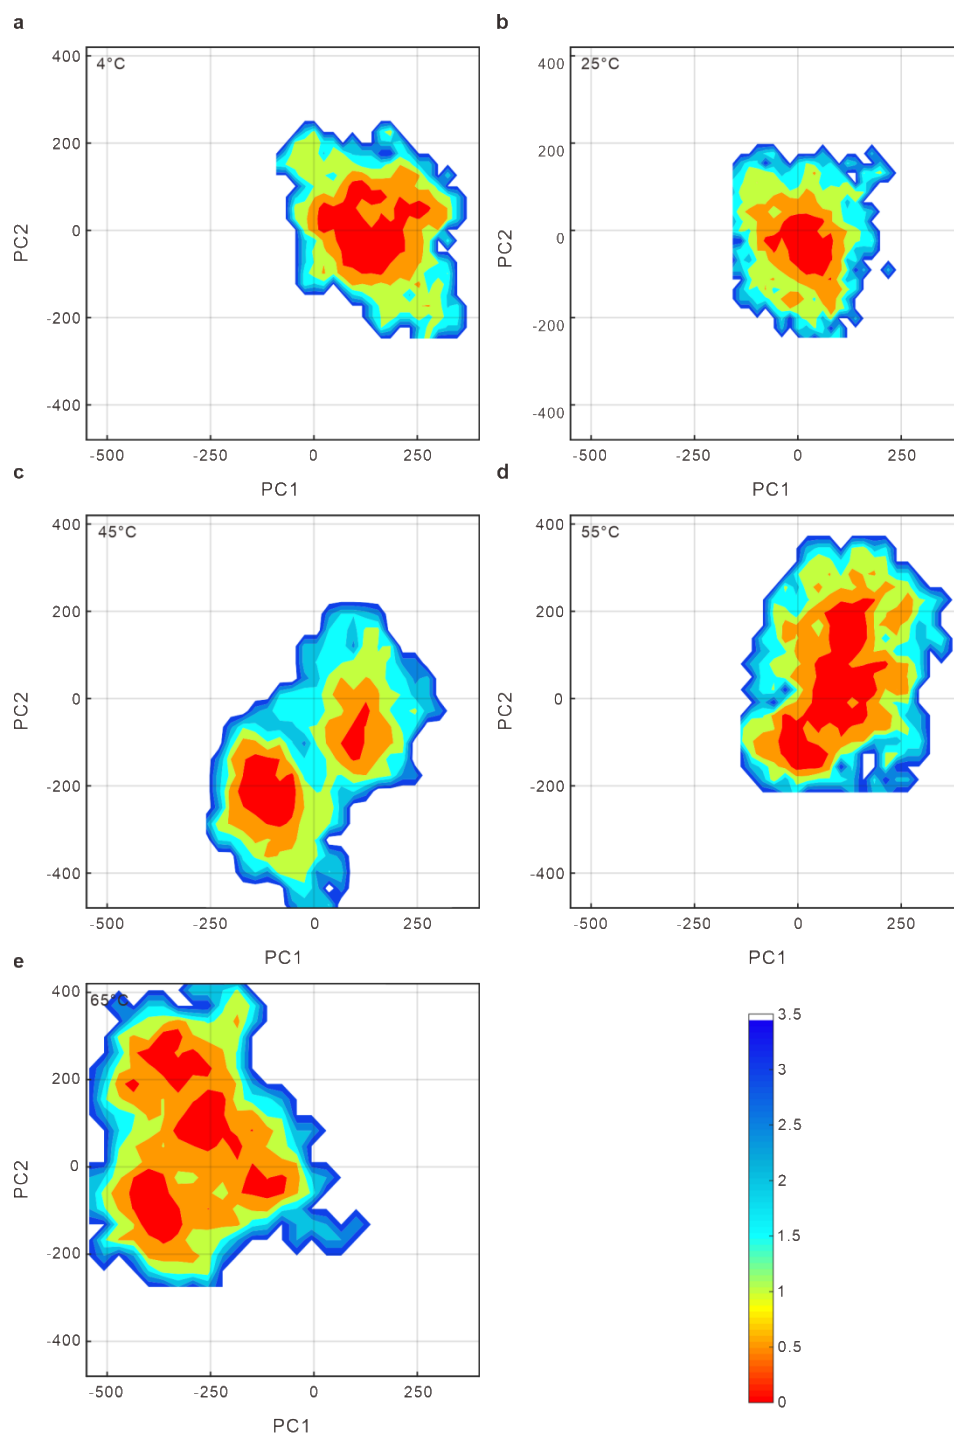

**Supplementary Fig. 44. Temperature-dependent conformational distributions obtained from principal component analysis (PCA).** The projections of the trajectories onto the first two principal components (PC1 and PC2) are shown for (a) 4 °C, (b) 25 °C, (c) 45 °C, (d) 55 °C, and (e) 65 °C. The contour color scale represents the probability density of sampled conformations, ranging from low density (blue) to high density (red).

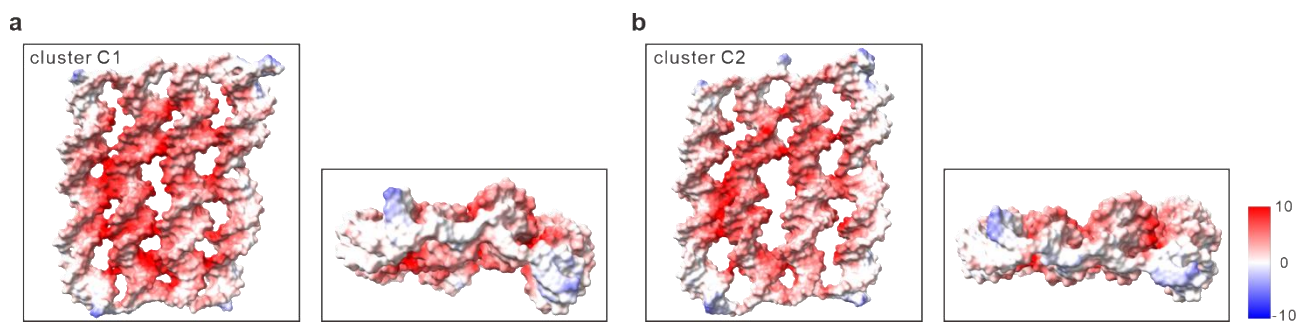

**Supplementary Fig. 45. Surface electrostatic potential analysis of the two representative conformational clusters.** (a) cluster C1 and (b) cluster C2. For each cluster, the front view and the side view observed from the bottom of the front view are shown, with the electrostatic potential mapped onto the DNA origami surface. The electrostatic potential is color-coded from  $-10$  (blue) to  $+10$  (red).

### 13 Supplementary table

Table S1. Names, modifications, and sequences of DNA oligonucleotides used for the assembly of DNA origami. The header of the DNA sequence table is explained using 10[215] as an example. Here, 10 refers to the DNA double-helix index in the caDNAno design, and [215] indicates the starting position of the staple strand. Staple sequences of square DNA origami (SDO).

| Start   | End     | Sequence                          | Length |
|---------|---------|-----------------------------------|--------|
| 10[215] | 8[216]  | TTTATTTTCGACTTGCGGGAGGTTTTTAACGT  | 32     |
| 10[119] | 8[120]  | AACGAGAAAAAATGTTTAGACTGGCTAACGGA  | 32     |
| 9[200]  | 11[199] | GAACCTCCCATCGTAGGAATCATTTCGACGACA | 32     |
| 12[183] | 10[184] | AGCCAGTAAGTAATTCTGTCCAGAACCGCGCC  | 32     |
| 15[296] | 17[295] | AACATAGCAGTAACAGTACCTTTTCGTCAGAT  | 32     |
| 22[215] | 20[216] | TTTTGACGCTGACCTGAAAGCGTAGCTGAGAG  | 32     |
| 13[264] | 15[263] | GAATAAACATAGTGAATTTATCAAAATCGTCG  | 32     |
| 0[151]  | 1[135]  | GTATAGCCCGGAATAGGTGTATCAAGTAAATG  | 32     |
| 14[23]  | 12[24]  | AAAGGGTGTTTAGCTATATTTTCAAATGGTCA  | 32     |
| 10[55]  | 8[56]   | GGATTGCAGACGATAAAAACCAAAACTAATG   | 32     |
| 17[136] | 19[135] | TCCGTGGGTCACGTTGGTGTAGATGTTGGGTA  | 32     |
| 23[136] | 23[167] | CAAAGGGCGAAAAACCGTCTATCAAGACAGGA  | 32     |
| 1[72]   | 3[71]   | AGACAGCCAAAATCTCCAAAAAACAACAAC    | 32     |
| 4[23]   | 2[24]   | AAAAGAATGAGGTGAATTTCTTAATTATCAGC  | 32     |
| 11[296] | 13[295] | ATGTAGAATAGTATCATATGCGTTCTAGAAAA  | 32     |
| 9[136]  | 11[135] | CAATACTGTCAAATGCTTTAAACAGCGGATGG  | 32     |
| 9[40]   | 11[39]  | TACCAGACTCAAAAAGATTAAGAGATTTCGAGC | 32     |
| 17[104] | 19[103] | TAAATGTGTGCATCTGCCAGTTTGGGCGAAAAG | 32     |
| 15[200] | 17[199] | TTAATGGTTCAATTACCTGAGCATATACTTC   | 32     |
| 19[296] | 21[295] | TTAGACTTAAAAATACCGAACGAACTAAAACA  | 32     |
| 15[232] | 17[231] | TGAGTGAAGTTACAAAATCGCGCAACCATATC  | 32     |
| 18[87]  | 16[88]  | ACGACAGTCCTGTAGCCAGCTTCAGCCCCAA   | 32     |
| 11[104] | 13[103] | TCCTTTTGGGAAGTTTCATTCCATAATCATAAC | 32     |
| 5[136]  | 7[135]  | TAGCCGGAGAACTGACCAACTTTGTAAAGAAC  | 32     |
| 6[119]  | 4[120]  | CAGATGAAATCCGCGACCTGCTCCTACAGAGG  | 32     |
| 13[232] | 15[231] | ACCGACCGGACTACCTTTTTAACCAATATATG  | 32     |
| 22[279] | 20[280] | AATATCCAGCGCGAACTGATAGCCCCACCAGC  | 32     |
| 12[151] | 10[152] | GCTCAACATTAATTGCTGAATATAATTCATTG  | 32     |
| 13[104] | 15[103] | AGGCAAGGAGCCTTTATTTCAACGCTATTTTT  | 32     |
| 6[247]  | 4[248]  | GAAACGCATATGGTTTACCAGCGGAGCCATT   | 32     |
| 22[55]  | 20[56]  | CGGTCCACGTGCCTAATGAGTGAGGCTGTTTC  | 32     |
| 9[296]  | 11[295] | AACGAGCGACCAATCAATAATCGGTTACGAGC  | 32     |
| 18[55]  | 16[56]  | CAGCCAGCAACGCCATCAAAAATATATTTAAA  | 32     |

|         |         |                                   |    |
|---------|---------|-----------------------------------|----|
| 20[23]  | 18[24]  | CACAACATGCAAAGCGCCATTCGCTGGTGCCG  | 32 |
| 1[232]  | 3[231]  | TGGCTTTTACCAGAACCACCACCAATTTTCGG  | 32 |
| 10[87]  | 8[88]   | TTACCCTGCAAAGAAGTTTTGCTTCATCAG    | 32 |
| 20[119] | 18[120] | AGGTGACGCTGCAAGGCGATTAAGGGCGCAT   | 32 |
| 1[296]  | 3[295]  | AGTGCCCGCGCCTCCCTCAGAGCCGAGCCACC  | 32 |
| 9[264]  | 11[263] | GCTACAATTTCCAAGAACGGGTATCCTGAACA  | 32 |
| 15[40]  | 17[39]  | ACCATCAAGTTAATATTTTTGTTAATTTTTTAA | 32 |
| 6[87]   | 4[88]   | CTGGCTGAATTTGTATCATCGCCTTGAGGAAG  | 32 |
| 6[183]  | 4[184]  | TGTTAGCAATATAAAAAGAAACGAAACGTCAC  | 32 |
| 22[247] | 20[248] | CAACAGGAACAATATTTTTGAATGGTCAGTAT  | 32 |
| 5[72]   | 7[71]   | CAACGGAGCCTTCATCAAGAGTAATAGTAAAT  | 32 |
| 23[40]  | 22[56]  | AATCCCTATAAATCAAAGAATAGCAGCAAG    | 32 |
| 16[119] | 14[120] | TGTACCCCTACAAAGGCTATCAGGATACTTTT  | 32 |
| 23[16]  | 22[24]  | TGATGGTGGTCCGAAAGGCGAAA           | 24 |
| 17[72]  | 19[71]  | CTGGCCTTATCGGCCTCAGGAAGATCGGTGCG  | 32 |
| 23[72]  | 22[88]  | TAGGGTTGAGTGTGTTCCAGTTTATTGCCCT   | 32 |
| 12[55]  | 10[56]  | TTTGACCAGAACCAGACCGGAAGCAGCAAAGC  | 32 |
| 21[104] | 23[103] | CAGTCGGGAGACGGGCAACAGCTGGGAACAAG  | 32 |
| 16[23]  | 14[24]  | TTAAATTTAGAAAGGCCGAGACAAAGATTCA   | 32 |
| 6[279]  | 4[280]  | TAGCCGAAACATTCAACCGATTGACATTAAAG  | 32 |
| 23[264] | 22[280] | TTCTTTGATTAGTAATAACATCACTTGCTGGT  | 32 |
| 1[136]  | 3[135]  | AATTTTCTTCAGCGAGTGAGAACCGCTTTT    | 32 |
| 5[168]  | 6[152]  | GTGGCAACAACGTAGAAAATACATCAATCATA  | 32 |
| 3[200]  | 5[199]  | AGACTGTACATTAGCAAGGCCGAAAGACACC   | 32 |
| 7[72]   | 9[71]   | TGGGCTTGTAGGAATACCACATTCATAGCGAG  | 32 |
| 23[232] | 22[248] | TCCATCACGCAAATTAACCGTTGTAGCCATTG  | 32 |
| 11[168] | 13[167] | AAAGGTAAATAAGAGAATATAAAGGAACGCGA  | 32 |
| 14[215] | 12[216] | AGGTTGGGGACCTAAATTTAATGGTTAACAAC  | 32 |
| 20[183] | 18[184] | TTGCTGAATCAGTTGGCAAATCAATTATCATC  | 32 |
| 4[151]  | 2[152]  | CATCGGAAGTCACCCTCAGCAGCGAACAACCTT | 32 |
| 5[40]   | 7[39]   | CCCAGCGAATATTCATTACCCAAAAGGCTTGC  | 32 |
| 9[232]  | 11[231] | TTAAATCACTCATCGAGAACAAGCAGAACGCG  | 32 |
| 4[279]  | 2[280]  | GTGAATTAATAAATCACCGGAACCAGCCACCCT | 32 |
| 19[168] | 21[167] | ATATCTGGCCTCAAATATCAAACCACGACCAG  | 32 |
| 4[183]  | 2[184]  | CAATGAAAAGAATCAAGTTTGCCCTCAGGTCAG | 32 |
| 12[119] | 10[120] | CGGTGTCTATAAGAGGTCATTTTTGTTTCAGAA | 32 |
| 3[296]  | 5[295]  | ACCGGAACATTGACGGAAATTATTGGGAGGGA  | 32 |
| 4[87]   | 2[88]   | TTCCATTACGCATAACCGATATATAATTTTT   | 32 |
| 4[119]  | 2[120]  | CTTTGAGGTGCAGGGAGTTAAAGGTAGAAAGG  | 32 |
| 19[200] | 21[199] | AGGAATTGAAATGAAAAATCTAAACAGAGATA  | 32 |
| 22[87]  | 20[88]  | TCACCGCCGCGTTGCGCTCACTGCGTACCGAG  | 32 |
| 23[200] | 22[216] | TAATCAGTGAGGCCACCGAGTAAATACCTACA  | 32 |
| 13[296] | 15[295] | AGCCTGTTGATAGCTTAGATTAAGTCCTTGAA  | 32 |

|         |         |                                   |    |
|---------|---------|-----------------------------------|----|
| 8[279]  | 6[280]  | TTACAAAAACAATGAAATAGCAATTAAGCAGA  | 32 |
| 9[104]  | 11[103] | GTAATAGTTGACCATAAATCAAAATTAATTGC  | 32 |
| 5[264]  | 7[263]  | AAAGGGCGCAAAGTTACCAGAAGGATAATAAG  | 32 |
| 17[264] | 19[263] | AATTGCGTTTGCCCGAACGTTATTAGAGCCGT  | 32 |
| 10[151] | 8[152]  | AATCCCCCGGAATCGTCATAAATTTGGGAAG   | 32 |
| 23[168] | 22[184] | ACGGTACGCCAGAATCCTGAGAAGGGATTATT  | 32 |
| 17[40]  | 19[39]  | CCAATAGGTTTCCGGCACCGCTTCCATTTCAGG | 32 |
| 1[168]  | 3[167]  | TCCTCATTCCTTGATATTCACAAACGTAATCA  | 32 |
| 14[247] | 12[248] | GTCTGAGATGTGATAAATAAGGCGCAACAGTA  | 32 |
| 7[264]  | 9[263]  | AGCAAGAATAAACAGCCATATTATTGCACCCA  | 32 |
| 23[104] | 22[120] | AGTCCACTATTAAGAACGTGGACTTTCTTTT   | 32 |
| 1[200]  | 3[199]  | TCTGAATTTGACAGGAGGTTGAGGTTAGCGTC  | 32 |
| 6[151]  | 4[152]  | AGGGAACCACGAGGCGCAGACGGTAAAGACAG  | 32 |
| 3[168]  | 5[167]  | GTAGCGACCCATCGATAGCAGCACACATAAAG  | 32 |
| 12[23]  | 10[24]  | ATAACCTGCAAATATCGCGTTTTAGAAGCCCG  | 32 |
| 9[72]   | 11[71]  | AGGCTTTTACTATTATAGTCAGAAAACCTCCA  | 32 |
| 13[200] | 15[199] | CATCTTCTTTATATAACTATATGTTTACCTTT  | 32 |
| 9[168]  | 11[167] | TCCGGTATAGCAAATCAGATATAGTACCGACA  | 32 |
| 18[279] | 16[280] | TAAATCCTAGATTTTCAGGTTTAAACATCGGG  | 32 |
| 10[183] | 8[184]  | CAATAGCATCTAAGAACGCGAGGCCAGAGAGA  | 32 |
| 0[279]  | 1[263]  | TATTTTCGGAACCTATTATTCTGAAACTGGTAA | 32 |
| 22[23]  | 20[24]  | ATCCTGTTACGAGCCGGAAGCATACAATTCCA  | 32 |
| 10[23]  | 8[24]   | AAAGACTTAGCAACACTATCATAATACGAGGC  | 32 |
| 1[104]  | 3[103]  | AGTTTTGTAAGGAATTGCGAATAATTTCGGTCG | 32 |
| 19[136] | 21[135] | ACGCCAGGCCAGTGCCAAGCTTGCCTGCATTA  | 32 |
| 0[119]  | 1[103]  | AGGAGGTTTAGTACCGCCACCCTCCGATCTAA  | 32 |
| 8[247]  | 6[248]  | ATCCAAATAATTGAGTTAAGCCCAAAACCGAG  | 32 |
| 13[72]  | 15[71]  | TAGTAGTATAGAACCCTCATATATTCTAGCTG  | 32 |
| 3[104]  | 5[103]  | CTGAGGCTACTAAAGACTTTTTTCAGATAAATT | 32 |
| 0[87]   | 1[71]   | CACCCTCAGAACCGCCACCCTCAGCATTCCAC  | 32 |
| 11[264] | 13[263] | AGAAAAATGTATAAAGCCAACGCTTTAAATAA  | 32 |
| 17[232] | 19[231] | AAAATTATGTAACATTATCATTTTTATATCTTT | 32 |
| 14[279] | 12[280] | AAGAGTCAACCGGAATCATAATTAATACAAAT  | 32 |
| 20[87]  | 18[88]  | CTCGAATTCGCTATTACGCCAGCTAGGGGACG  | 32 |
| 0[247]  | 1[231]  | GTATTAAGAGGCTGAGACTCCTCAGTCATACA  | 32 |
| 12[87]  | 10[88]  | TGATTTCCGGATTAGAGAGTACCTATCAGGTC  | 32 |
| 16[87]  | 14[88]  | AAACAGGAATGCCGAGAGGGTAGCAAGGATA   | 32 |
| 2[215]  | 0[216]  | GCCAGCATTACCGTTCCAGTAAGCAGAGAAGG  | 32 |
| 7[232]  | 9[231]  | CCCACAAGAAGAAACGATTTTTTTGTTGAAGCC | 32 |
| 3[40]   | 5[39]   | ATACCGATGCACCAACCTAAAACGCTTTGACC  | 32 |
| 16[183] | 14[184] | TGATGAAAAACAATTTTCATTTGAAAAATGCTG | 32 |
| 8[87]   | 6[88]   | TTGAGATTAGATGGTTTAATTTTCACGCATAGG | 32 |
| 21[200] | 23[199] | GAACCCTTCTCAATCGTCTGAAATTGTTTTTA  | 32 |

|         |         |                                    |    |
|---------|---------|------------------------------------|----|
| 7[136]  | 9[135]  | TGGCTCATACGTTAATAAAAACGAAATAGCGTC  | 32 |
| 2[119]  | 0[120]  | AACAACACTACGTCTTTCCAGACGTTCCGTA    | 32 |
| 21[72]  | 23[71]  | CATTAATTTGGCCCTGAGAGAGTTGCCCGAGA   | 32 |
| 7[104]  | 9[103]  | CATTGTGAATTACAGGTAGAAAAGACAGAGGGG  | 32 |
| 4[55]   | 2[56]   | CTACGAAGAGTTGCGCCGACAATGAGGCTCCA   | 32 |
| 16[151] | 15[167] | ACGGTAATTGGAGCAAACAAGAGAAAAATTAA   | 32 |
| 19[40]  | 21[39]  | CTGCGCAAAATTGTTATCCGCTCAAAGTGTA    | 32 |
| 3[264]  | 5[263]  | TCATAATCTCACCGTCACCGACTTCAAAGACA   | 32 |
| 14[87]  | 12[88]  | AAAATTTTGCATTAACATCCAATAATAACAGT   | 32 |
| 8[215]  | 6[216]  | CAAAAATGTGAGCGCTAATATCAGCAAAAGAA   | 32 |
| 2[151]  | 0[152]  | TCAACAGTGTATGGGATTTTGCTATGATATA    | 32 |
| 15[168] | 17[167] | TTACATTTCAAACATCAAGAAAACCAATTCAT   | 32 |
| 19[72]  | 21[71]  | GGCCTCTTCGTAATCATGGTCATACTAACTCA   | 32 |
| 6[23]   | 4[24]   | ACAAAGCTACACTAAAACACTCATAAAGAGGC   | 32 |
| 14[55]  | 12[56]  | CAATGCCTAAAAGGTGGCATCAATAGATTTAG   | 32 |
| 10[247] | 8[248]  | GTACCGCAAGATTAGTTGCTATTTTTATCCCA   | 32 |
| 18[119] | 16[120] | CGTAACCGAGCGAGTAACAACCCGCAATCATA   | 32 |
| 7[40]   | 9[39]   | CCTGACGATAACGCCAAAAGGAATCCCTCGTT   | 32 |
| 0[215]  | 1[199]  | ATTAGGATTAGCGGGTTTTGCTCGCGCAGTC    | 32 |
| 8[183]  | 6[184]  | ATAACATAACTGAACACCCTGAACACGCAGTA   | 32 |
| 5[200]  | 7[199]  | ACGGAATAATTAAGACTCCTTATTAAGTCAG    | 32 |
| 15[72]  | 17[71]  | ATAAATTAAGATTGTATAAGCAAAATTCGCGT   | 32 |
| 18[23]  | 16[24]  | GAAACCAGTTGTTAAATCAGCTCAAATTCGCA   | 32 |
| 12[279] | 10[280] | TCTTACCAAATATCCCATCCTAATCTGTCTTT   | 32 |
| 15[136] | 17[135] | TGAGAGTCCGTAAAACACTAGCATGTTCCGATTC | 32 |
| 19[232] | 21[231] | AGGAGCACCTGCAACAGTGCCACAGAATACG    | 32 |
| 20[151] | 18[152] | AACGACGGGTTTTCCAGTCACGAACCGTAAT    | 32 |
| 22[119] | 20[120] | CACCAGTGAAACCTGTGCGTGCCAGATGCCTGC  | 32 |
| 12[247] | 10[248] | GGGCTTAATCAACAATAGATAAGTTAAACCAA   | 32 |
| 22[183] | 20[184] | TACATTGGGGGACATTCTGGCCAAGCATCACC   | 32 |
| 0[303]  | 1[295]  | TATAAACAGTTAATGCTGAGTAAC           | 24 |
| 1[40]   | 3[39]   | CAGTACAACCTTTAATTGTATCGGTACAGCTTG  | 32 |
| 2[87]   | 0[88]   | TCACGTTGCTCATAGTTAGCGTAAAGAACCGC   | 32 |
| 15[104] | 17[103] | GAGAGATCGGTTGATAATCAGAAAATCAACAT   | 32 |
| 17[296] | 19[295] | GAATATACTACAAACAATTCGACATAGAAGTA   | 32 |
| 8[23]   | 6[24]   | ATAGTAAGGCTCATTAGTGAATATCAACGTA    | 32 |
| 10[279] | 8[280]  | CCTTATCATTATCCTGAATCTTATTTGCCAG    | 32 |
| 15[264] | 17[263] | CTATTAATTAACGGATTCGCCTGAAATAAAGA   | 32 |
| 14[119] | 12[120] | GCGGGAGACAAAGAATTAGCAAAACTAAAGTA   | 32 |
| 14[151] | 12[152] | TACCAAAACAGAGCATAAAGCTAAATGCTGTA   | 32 |
| 14[183] | 12[184] | ATGCAAATTTTCAAATATATTTTACATTTTCG   | 32 |
| 20[215] | 18[216] | CCAGCAGCAGGAAGGTTATCTAAAGCGGAACA   | 32 |
| 22[151] | 20[152] | TGCGTATTGCCAACGCGCGGGGAGCGTTGTAA   | 32 |

|         |         |                                         |    |
|---------|---------|-----------------------------------------|----|
| 16[247] | 14[248] | AATACCAATAACCTTGCTTCTGTAAATCATAG        | 32 |
| 18[215] | 16[216] | AAGAAACCGGAAGGGTTAGAACCTGAGGCGAA        | 32 |
| 4[247]  | 2[248]  | TGGGAATTCCTTATTAGCGTTTGCACCCTCA         | 32 |
| 18[151] | 16[152] | GGGATAGGAACAAACGGCGGATTGATCGATGA        | 32 |
| 5[232]  | 7[231]  | AAAATTCAATAATAACGGAATACCAGAGATAA        | 32 |
| 21[168] | 22[152] | TAATAAAACAGATTCACCAGTCACAGGCGGTT        | 32 |
| 17[168] | 19[167] | CAATATAAGATTATCAGATGATGGCTCAATCA        | 32 |
| 17[200] | 19[199] | TGAATAATACCAGAAGGAGCGGAACAGTTGAA        | 32 |
| 21[232] | 23[231] | TGGCACAGAAAACGCTCATGGAAAAGAGTCTG        | 32 |
| 8[119]  | 6[120]  | ACAACATTATTACCTTATGCGATTAAAGAGGA        | 32 |
| 20[279] | 18[280] | AGAAGATAAATACATTTGAGGATTACTCGTAT        | 32 |
| 11[136] | 13[135] | CTTAGAGCTGTTTTAAATATGCAATTAAGCAA        | 32 |
| 21[264] | 23[263] | TCTTAAATGAACAATATTACCGCCAGCAATAC        | 32 |
| 19[264] | 21[263] | CAATAGATAAACAGAGGTGAGGCGGCTATTAG        | 32 |
| 6[55]   | 4[56]   | AGAACCGTTATACCAAGCGCAATAATGCCA          | 32 |
| 7[296]  | 9[295]  | TACCGAAGTCTTCCAGAGCCTAACCAACGCT         | 32 |
| 18[247] | 16[248] | AAGTTTGATTGCACGTAAAACAGATTGCTTTG        | 32 |
| 8[55]   | 6[56]   | CAGATACAGAAACACCAGAACGAGTCTTGACA        | 32 |
| 21[296] | 23[303] | TCGCCATTACTCAAATATCGGCCTGCTGAGTAGAAGA   | 40 |
| 5[104]  | 7[103]  | GTGTGCAACGGTGTACAGACCAGGACTTTAAT        | 32 |
| 1[264]  | 3[263]  | TAAGTTTTCCACCCTCAGAGCCACCCATCTTT        | 32 |
| 2[55]   | 0[56]   | AAAGGAGCACTACAACGCCTGTAGAGCCACCA        | 32 |
| 11[72]  | 13[71]  | ACAGGTCAAATTCTGCGAACGAGTTCTACTAA        | 32 |
| 20[55]  | 18[56]  | CTGTGTGACTGTTGGGAAGGGCGATCGCACTC        | 32 |
| 20[247] | 18[248] | TAACACCGTAACAATAATAGATTAATTTAA          | 32 |
| 12[215] | 10[216] | GCCAACATCATGTTTCAGCTAATGCAAGCCGTT       | 32 |
| 16[215] | 14[216] | TTATTCATAAACAGTACATAAATCTCCGGCTT        | 32 |
| 21[136] | 23[135] | ATGAATCGGGGCGCCAGGGTGGTTTCCAACGT        | 32 |
| 11[200] | 13[199] | ATAAACAAGTAATTTAGGCAGAGGGTTAATTT        | 32 |
| 13[168] | 14[152] | GAAAACCTCCAATCGCAAGACAAAATCGGTTG        | 32 |
| 11[40]  | 13[39]  | TTCAAAGCTTAGATACATTTTCGCATTTGGGGC       | 32 |
| 6[215]  | 4[216]  | CTGGCATGAGTTTATTTTGTACACCAGTAGC         | 32 |
| 19[104] | 21[103] | GGGGATGTTCTAGAGGATCCCCGGCCGCTTTC        | 32 |
| 16[279] | 14[280] | AGAAACAATAATTTCCCTTAGAAACGCTGAG         | 32 |
| 2[279]  | 0[280]  | CAGAACCGAACGGGGTCAGTGCCTCCCCTGCC        | 32 |
| 3[232]  | 5[231]  | TCATAGCCAGAGCCAGCAAAAATCAATCAATAG       | 32 |
| 4[215]  | 2[216]  | ACCATTACGCGCGTTTTTCATCGGCGAGCCGCC       | 32 |
| 2[23]   | 0[16]   | TGCTTTCTACCGTAACACTGAGTCCAATAGGAACCCATG | 40 |
| 3[136]  | 5[135]  | GCGGGATCCGAGGGTAGCAACGGCATGTTACT        | 32 |
| 13[136] | 15[135] | TAAAGCCTACATTATGACCCTGTATCATTGCC        | 32 |
| 0[55]   | 1[39]   | CCCTCATTTTCAGGGATAGCAAGCTTCGTAC         | 32 |
| 7[168]  | 9[167]  | GAGAATTA AAAACAGGGAAGCGCAAAGGCTTA       | 32 |
| 2[183]  | 0[184]  | ACGATTGGAAAGCCAGAATGGAAAAGTACCAG        | 32 |

|         |         |                                   |    |
|---------|---------|-----------------------------------|----|
| 3[72]   | 5[71]   | CATCGCCCAAACGGGTAAAATACGACAAAGTA  | 32 |
| 8[151]  | 7[167]  | AAAAATCTTATACCAGTCAGGACGTTAGACGG  | 32 |
| 16[55]  | 14[56]  | TTGTAAACTATGATATCAACCGTTTTAAATG   | 32 |
| 2[247]  | 0[248]  | GAGCCGCCGATGATACAGGAGTGTACATGAAA  | 32 |
| 18[183] | 16[184] | ATATTCCTTCCTGATTGTTTGGATAAAGAAGA  | 32 |
| 7[200]  | 9[199]  | AGGGTAATAAAAATAGCAGCCTTTAGTTTTAGC | 32 |
| 11[232] | 13[231] | CCTGTTTATTGAGAATCGCCATATTTTTGAAAT | 32 |
| 5[296]  | 7[295]  | AGGTAAATCCCTTTTTAAGAAAAGAGCTATCT  | 32 |
| 13[40]  | 15[39]  | GCGAGCTGGAGTAATGTGTAGGTAGTCAAATC  | 32 |
| 0[183]  | 1[167]  | GCGGATAAGTGCCGTCGAGAGGGTCAAATAAA  | 32 |
| 21[40]  | 23[39]  | AGCCTGGGGCTGGTTTGCCCCAGCATCGGCAA  | 32 |

Table S2. Staple sequences of Triangular DNA origami (TDO).

| Start   | End     | Sequence                                    | Length |
|---------|---------|---------------------------------------------|--------|
| 11[200] | 12[184] | TATGATATCGGAGACAGTCAAATCTTTTGCTC            | 32     |
| 3[152]  | 1[159]  | TTCATTTGAATACCAAGTTACAAAAGGTTAACGTCAGAT     | 40     |
| 5[296]  | 7[295]  | GTTTTCATTTGAGGGAGGGAAGGTAAGAAACG            | 32     |
| 31[272] | 29[279] | GGCAAGTGTAGCGGTCTATAATCAGTGAGGCCCTCATGGA    | 40     |
| 15[168] | 17[167] | GTTGAAAAAATTGTATCGGTTTATAATACGTA            | 32     |
| 3[101]  | 5[103]  | GAAGATGATGAGCGATAGCTTAGATTAACCTTTTT         | 35     |
| 15[104] | 17[103] | CAGTTTCAGCGCCGACAATGACAAAACGGCTA            | 32     |
| 18[183] | 17[199] | AGAGGCAAACGAAGGCACCAACCTTGAATCCC            | 32     |
| 27[280] | 25[282] | GAAAAATCAGTTGGCAAATCAACATTTTAAAAGTT         | 35     |
| 29[136] | 31[143] | GAGCCGGATGCCAGCTGCATTAATGGAACAAGAGTCCACT    | 40     |
| 7[56]   | 6[48]   | ACAGTAGGATCATATGCGTTATAC                    | 24     |
| 27[120] | 25[119] | CAGCTTCTGACCGTAATGGGATATTTTGTTA             | 32     |
| 30[367] | 31[378] | ATCAGAGCGGGAGCTAGCTTTGACGAGCACGTATAACGTGCTT | 43     |
| 15[200] | 16[184] | AGTACGGTAACATGTTTTAAATATTCCAAAAG            | 32     |
| 29[296] | 31[303] | CGCTCAATTCCTGAGAAGTGTTTTACGCTGCGCGTAACCA    | 40     |
| 15[248] | 13[247] | CTGCGAACATTAACATCCAATAAACTTTTGC             | 32     |
| 31[176] | 30[184] | GAAAAACCGTCTATCATTAATTGC                    | 24     |
| 19[144] | 17[151] | AGGCTTGCCCTGACGAACTCATCTTTGACCCCTCCATTA     | 40     |
| 3[248]  | 1[255]  | TTGAGGCAAATGGAAAGCGCAGTCAGTGCCCGTATAAACA    | 40     |
| 7[248]  | 5[247]  | CAAACGTAATTATCACCGTCACCGGCACCGTA            | 32     |
| 5[200]  | 6[184]  | AGCAAGGCATCACCAGTAGCACCAAATATAT             | 32     |
| 29[216] | 27[215] | CCTTGCTGAGCCCTAAAACATCGCGATAAAAC            | 32     |
| 27[136] | 29[135] | CTTCTGGTAAAGGGGGATGTGCTGCAACATAC            | 32     |
| 11[128] | 13[135] | ATTCTGAAACATGAAAGTATAGCCCAGGAATAGCAGAACCG   | 40     |
| 15[120] | 13[119] | AGAATAGACCCTCATAGTTAGCGTTCAGAACC            | 32     |
| 5[88]   | 4[80]   | GAGAGACTAGACGCTGAGAAGAGT                    | 24     |
| 8[367]  | 9[378]  | AGAGGGTAATTGAGCGTTAGACGGGAGAATTAAGTGAACACCC | 43     |
| 27[69]  | 29[71]  | CAGTTTGAGGGGTAAAACGACGGCCAGCGAATTTCG        | 35     |

|         |         |                                             |    |
|---------|---------|---------------------------------------------|----|
| 28[335] | 29[327] | AAAAGGGACATTCTGGTTTACATT                    | 24 |
| 7[296]  | 9[303]  | CAAAGACAAGAGCAAGAAACAATGTTTAACGTCAAAAATG    | 40 |
| 31[304] | 29[311] | CCACACCCGCCGCGCTGAACGGTACGCCAGAACGTCTGAA    | 40 |
| 17[280] | 15[279] | GAAGCAAAAACCTTTAATTGCTCCTACCATTAG           | 32 |
| 29[152] | 27[151] | GTGTAAAGATTACGCCAGCTGGCGGCCGAAA             | 32 |
| 7[72]   | 9[79]   | GAGAATCGAATCGGCTGTCTTTCCAAGGCTTATCCGGTAT    | 40 |
| 17[200] | 19[207] | CCTCAAATCGTCATAAATATTATAGATGGTTTAATTCA      | 40 |
| 19[176] | 18[184] | TAGTAAATTGGGCTTGAAAACGAA                    | 24 |
| 7[280]  | 5[279]  | ACATATAAAAATATTGACGGAAATGCCTTTAG            | 32 |
| 9[5]    | 8[16]   | GTTTTATTTTCATCGTAGGAATCATTACCGCACTCATCGAGA  | 43 |
| 16[47]  | 6[336]  | GGGAGTTAAAGATGGTTTACCA                      | 22 |
| 17[248] | 15[247] | AAATCAGGTTTTGCGGATGGCTTATCCCAATT            | 32 |
| 19[208] | 17[215] | ACTTAAATCATTGTGATCCAATACTGCGGAATGCTTTAAA    | 40 |
| 9[240]  | 7[247]  | TAAACAGCCATATTATTTAAGAAAAGTAAGCATATGTTAG    | 40 |
| 23[200] | 24[184] | TCCTGATTGATGATGGCAATTCATTGTACCCC            | 32 |
| 31[208] | 29[215] | GAAAGCCGGCGAACGTACTTCTTTGATTAGTAACTATCGG    | 40 |
| 29[280] | 27[279] | AATACCTACGTAAGAATACGTGGCCAGCAAAT            | 32 |
| 11[224] | 13[231] | ATAAATTAATGCCGGATGTAGGTAAAGATTCAATTATGAC    | 40 |
| 15[296] | 17[295] | GTCAATAAGTCAGGATTAGAGAGTGCGGATTG            | 32 |
| 27[248] | 25[247] | CAACAGTGGAAGGTTATCTAAAATTCGTATTA            | 32 |
| 9[304]  | 7[311]  | AAAATAGCAGCCTTTAGTTAAGCCCAATAATACCACGGAA    | 40 |
| 17[264] | 19[271] | CTGACTATGAAGTTTTGCCAGAGGTATACCAGTCAGGACG    | 40 |
| 29[232] | 31[239] | CAGAACAATAACCGTTGTAGCAATGGCGAGAAAGGAAGGG    | 40 |
| 15[88]  | 14[80]  | GCTAAACAGTCGTCTTCCAGACG                     | 24 |
| 17[152] | 15[151] | ACGGGTAACAGCTTGCTTTCGAGGAATTGCGA            | 32 |
| 7[264]  | 9[271]  | ATACATAAATTACCGAAGCCCTTTTTATCCCAATCCAAAT    | 40 |
| 16[335] | 17[327] | AAGCGAACCAGACCGGCGAAAGAC                    | 24 |
| 11[256] | 13[263] | GAGAGATCTACAAAGGTCATATATTTAAATGCCTTTATT     | 40 |
| 14[79]  | 4[304]  | TTAGTAAATGAGTCATAGCCCC                      | 22 |
| 23[160] | 25[167] | ACGGTAATCGTAAAACATCAGAAAAGCCCAATAATTCGC     | 40 |
| 9[48]   | 7[55]   | AGCAAATCAGATATAGTTATCATTCCAAGAACAACGCTCA    | 40 |
| 9[144]  | 7[151]  | AGATTAGTTGCTATTTTGTATCAACAATAGATAAAGTA      | 40 |
| 11[160] | 13[167] | ACTCCTCAAGAGAAGGGCGGATAAGTGCCGTCTTTTCAGG    | 40 |
| 29[56]  | 28[48]  | ACCGAGCTTGCCAAGCTTGCATGC                    | 24 |
| 15[280] | 13[282] | ATACATTTAAGGTGGCATCAATTCAGGATAAAAAT         | 35 |
| 17[232] | 19[239] | AATGACCATTAGACTGGATAGCGATTACCTTATGCGATT     | 40 |
| 13[152] | 11[159] | CACCCTCAGAGAGGGTTGATATAAGTATTAAGAGGCTGAG    | 40 |
| 31[336] | 29[346] | GGCGCGTACTATGGTTAACAGGAGGCCGATTACACCAGTCACA | 43 |
| 26[79]  | 14[304] | CGTGCATCTGCATATTTTCATT                      | 22 |
| 13[120] | 11[127] | GCCACCCTGTGTATCACCGTACTCTATTTTCGGAACCTATT   | 40 |
| 29[168] | 31[175] | GCCTAATGCACTGCCCGCTTCCATCCAACGTCAAAGGGC     | 40 |
| 18[367] | 19[378] | CAAAGGAATTACGAGTAGGAATACCACATTCAACTAATGCAG  | 43 |
| 27[88]  | 26[80]  | CAGTATCGATGGGCGCATCGTAAC                    | 24 |

|         |         |                                              |    |
|---------|---------|----------------------------------------------|----|
| 13[264] | 15[263] | TCAACGCATACTAATAGTAGTAGCGAGTAGAT             | 32 |
| 15[216] | 13[215] | GTTTCATTAAGAATTAGCAAAAATTCGGTTGTA            | 32 |
| 19[304] | 17[311] | CTAACGGAACAACATTTTTACCAGACGACGATAGATTAAG     | 40 |
| 31[5]   | 30[16]  | AAGCGGTCCACGCTGGTTTTGCCCCAGCACCGCCTGGCCCTGAG | 43 |
| 27[152] | 25[151] | CCAGGCAACGTTCGGATTCTCCGTGGGAACGCC            | 32 |
| 8[183]  | 7[199]  | TGTTTCAGCTCCAGACGACGACAATACGGAATA            | 32 |
| 31[240] | 29[247] | AAGAAAGCGAAAGGAGTGTCCATCACGCAAATTATTACCG     | 40 |
| 19[336] | 17[346] | TTCATCAGTTGAGATTGCATAGTAAGAGCAACTCGCGTTTTAA  | 43 |
| 27[104] | 29[103] | AAGATCGCGGTAACGCCAGGGTTTGTGTGAAA             | 32 |
| 3[216]  | 1[223]  | CCACCAGACAGTAAGCGTCATACATAAGTTTTAACGGGGT     | 40 |
| 17[296] | 19[303] | CATCAAAAAAAAAACCAAAATAGCGACGTTAATAAAACGAA    | 40 |
| 3[264]  | 5[263]  | GATTGGCCAATCACCGGAACCAGACGACAGAA             | 32 |
| 17[168] | 19[175] | ATGCCACTAAGAATACACTAAAACGAAACACCAGAACGAG     | 40 |
| 23[128] | 25[135] | TGAGAGTCTGGAGCAATAAGCAAATATTTAAACATTTTTT     | 40 |
| 24[183] | 23[199] | GGTTGATATAGCATGTCAATCATACAATATAA             | 32 |
| 13[101] | 15[103] | TACCGCCACCCAACGATCTAAAGTTTTACTTTCAA          | 35 |
| 17[136] | 19[143] | AGGAAGTTCAGCGATTATACCAAGGCTCATTTCAGTGAATA    | 40 |
| 29[248] | 27[247] | CCAGCCATAATGGCTATTAGTCTTACCGCCTG             | 32 |
| 3[120]  | 1[127]  | TCAAGAAATTATTCATTTCAATTA AAAACAGAAATAAAGA    | 40 |
| 6[47]   | 28[336] | AAATTCCTACCCGACCAGTAAT                       | 22 |
| 9[80]   | 7[87]   | TCTAAGAACGCGAGGCGTAGAAACCAATCAATCCATATTT     | 40 |
| 5[136]  | 7[135]  | ATGTAAATAAATACCGACCGTGTGCCAGTAAT             | 32 |
| 9[112]  | 7[119]  | CGACTTGCGGGAGGTTAAAAATAATATCCCATCAGAGGCA     | 40 |
| 9[272]  | 7[279]  | AAGAAACGATTTTTTGAATAGCAATAGCTATAGGTGGCA      | 40 |
| 29[72]  | 31[79]  | TAATCATGGTGGTTTTTCTTTTCAATCGGCAAAATCCCTT     | 40 |
| 15[264] | 17[263] | TTAGTTTGTGTTGATAAGAGGTCATTCTTTACC            | 32 |
| 30[183] | 29[199] | GTTGCGCTAGTGAGCTAACTCACAGAGTAGAA             | 32 |
| 3[136]  | 5[135]  | AATTACATATTAATTTCCCTTAGATAACTAT              | 32 |
| 5[120]  | 3[119]  | TGGGTTATAATCCTTGAAAACATAAACAAACA             | 32 |
| 4[183]  | 3[199]  | TGTGAGTGGGAAACAGTACATAAACCCCTCAGA            | 32 |
| 29[200] | 31[207] | GAACTCAAATAACATCACTTGCCTTTTAGAGCTTGACGGG     | 40 |
| 29[37]  | 31[47]  | CTCTAGAGGATCAGCTGATTGCCCTTCAGGCGAAAATCCTGTT  | 43 |
| 31[48]  | 29[55]  | TGATGGTGGTTCGGAACCAGTGAGACGGGCAACCCCGGGT     | 40 |
| 17[72]  | 19[79]  | AGACAGCAGTCGAAATCCGCGACCCCTTCATCAAGAGTAA     | 40 |
| 4[79]   | 26[304] | CAATAGTGAATTATCAAAACCCT                      | 22 |
| 19[240] | 17[247] | TTAAGAACTGGCTCATGGGTAATAGTAAAATGTAAATCAA     | 40 |
| 23[256] | 25[263] | AAAATTATTTGCACGTATCATTTTGCGGAACAGCCCGAAC     | 40 |
| 9[208]  | 7[215]  | TCTTTCCAGAGCCTAATACCAGAAGGAAACCGAACTGGCA     | 40 |
| 27[168] | 29[167] | TCGCCATTTGCGGGCCTCTTCGCTCCTGGGGT             | 32 |
| 27[232] | 29[231] | GTATTAATAATGCGCGAACTGATGTAATATC              | 32 |
| 27[296] | 29[295] | CACCTTGCCCTTCTGACCTGAAAGCATTTTGA             | 32 |
| 1[160]  | 3[167]  | GAATATACAGTAACAGTCGCCTGATTGCTTTGAATTACCT     | 40 |
| 3[200]  | 4[184]  | GCCGCCACACCCTCAGAGCCACCATCAATATA             | 32 |

|         |         |                                             |    |
|---------|---------|---------------------------------------------|----|
| 7[88]   | 5[87]   | AACAACGCGAATCATAATTACTAGATAGGTCT            | 32 |
| 19[272] | 17[279] | TTGGGAAGAAAAATCTAGAGGCTTTTGCAAAATATAGTCA    | 40 |
| 5[168]  | 7[167]  | CAAAGAACATTTTCATCTTCTGACCAGGTAAAG           | 32 |
| 7[120]  | 5[119]  | TTTTTCGAGATAAATAAGGCGTTAAGCTTAGGT           | 32 |
| 29[264] | 31[271] | GAAAAACGACCGAGTAAAAGAGTCCGGGCGCTAGGGCGCT    | 40 |
| 5[232]  | 7[231]  | CGATAGCAACTTGAGCCATTTGGGACTCCTTA            | 32 |
| 19[112] | 17[119] | TCAACGTAACAAAGCTCGCGAAACAAAGTACATTGAGGAC    | 40 |
| 17[88]  | 15[87]  | AGGGTAGCCAACCATCGCCACGCGGGATTTT             | 32 |
| 17[328] | 19[335] | TTCAAATAACTATCATAACCCTCGATTACAGGTAGAAAGA    | 40 |
| 29[88]  | 27[87]  | TGTTTCCTTCCCAGTCACGACGTTGACGACGA            | 32 |
| 1[224]  | 3[231]  | CAGTGCCTTGAGTAACTCTGAATTTACCGTTCGCCGCCGC    | 40 |
| 14[183] | 13[199] | AACACTGAGCCCAATAGGAACCCAGAGCATAA            | 32 |
| 27[216] | 25[215] | AGAGGTGAACAACATAATAGATTAGGAAGTATT           | 32 |
| 3[232]  | 5[231]  | CAGCATTGCCTCCCTCAGAGCCGCGAAACCAT            | 32 |
| 19[80]  | 17[87]  | TCTTGACAAGAACCGGTGCGCTGATAAATTGTTTCGGAACG   | 40 |
| 31[80]  | 29[87]  | ATAAATCAAAGAATACGTATTGGGCGCCAGGGTCATAGC     | 40 |
| 3[168]  | 5[167]  | TTTTTAATAATAACCTTGCTTCTGTGCAAGA             | 32 |
| 15[152] | 13[151] | ATAATAATAAACTACAACGCCTGTAGAGCCAC            | 32 |
| 16[183] | 15[199] | GAGCCTTTTCTCCAAAAAAGGCGCAACTAA              | 32 |
| 30[15]  | 18[368] | AGAGTTGCAGCATAACATAACGC                     | 22 |
| 13[168] | 15[167] | GATAGCAAGTTTCGTACCAGTACTTTTTTCAC            | 32 |
| 17[37]  | 19[47]  | GCCGCTTTTGCGCCGGAACGAGGCGCACGGTGTACAGACCAGG | 43 |
| 24[111] | 12[272] | TTTGTTAAAAATTTTAGAACCC                      | 22 |
| 5[152]  | 3[151]  | AAATCCAATAAATCGTCGCTATTATTAACAAT            | 32 |
| 25[120] | 23[127] | AATCAGCTTTGTAAACGTTAATATCTATCAGGTCATTGCC    | 40 |
| 25[136] | 27[135] | AACCAATAGGAACAAACGGCGGATCGGCACCG            | 32 |
| 15[69]  | 17[71]  | ATTTTCTGTATATAACCGATATATTCGGCAGCGAA         | 35 |
| 7[104]  | 9[111]  | AATTTAGGCCTAATTTACGAGCATGTTTTAGCGAACCTCC    | 40 |
| 8[15]   | 30[368] | ACAAGCAAGCCTCCTCGTTAGA                      | 22 |
| 6[183]  | 5[199]  | TTTAGTTAGCGAGAAAACTTTTTCTTACCATT            | 32 |
| 13[248] | 11[255] | GGGAGAAGCAATGCCTGAGTAATGGAGGGTAGCTATTTTT    | 40 |
| 7[152]  | 5[151]  | CCGACAAATAAATTTAATGGTTTGGCTGATGC            | 32 |
| 29[312] | 27[314] | ATGGATTACCAACAGAGATAGAACTGAACCTCAA          | 35 |
| 6[335]  | 7[327]  | GCGCCAAAGACAAAAGTTTTGTCA                    | 24 |
| 7[216]  | 5[215]  | TGATTAAGAATTAGAGCCAGCAAACGGAAACG            | 32 |
| 15[136] | 17[135] | ACTAAAGGTGAATTTCTTAAACAGTTTTTCATG           | 32 |
| 13[200] | 14[184] | AGCTAAATAAGCAATAAAGCCTCATGTACCGT            | 32 |
| 15[232] | 17[231] | CAGTTGATGAGCTTAATTGCTGAAAAACGAG             | 32 |
| 19[5]   | 18[16]  | GACCAACTTTGAAAGAGGACAGATGAAGACGGTCAATCATAAG | 43 |
| 25[232] | 27[231] | TCGACAACATCTTTAGGAGCACTAGGCGGTCA            | 32 |
| 29[104] | 31[111] | TTGTTATCGGGGAGAGGCGGTTTGGCCCGAGATAGGGTTG    | 40 |
| 13[136] | 15[135] | CCACCCTCAGCATTCCACAGACAGAAGGAACA            | 32 |
| 25[168] | 27[167] | GTCTGGCCTGAGCGAGTAACAACCAGCGCCAT            | 32 |

|         |         |                                             |    |
|---------|---------|---------------------------------------------|----|
| 1[200]  | 2[184]  | ACTGGTAATGGCTTTTGATGATACAGAAACAA            | 32 |
| 9[336]  | 7[346]  | AAAACAGGGAAGCGCACTAATATCAGAGAGATAGAAAATTCAT | 43 |
| 7[328]  | 9[335]  | CAATCAATAACCCACAAGAATTGACAGAGAGAATAACATA    | 40 |
| 17[120] | 15[119] | TAAAGACTCTTGATACCGATAGTTGCGGAGTG            | 32 |
| 27[264] | 29[263] | AGAGCCAGACAGACAATATTTTTGTGCAACAG            | 32 |
| 14[303] | 15[295] | TGGGGCGCGAGCTGAACGCAAATG                    | 24 |
| 25[248] | 23[255] | AATCCTTTAAGAAACCACCAGAAGTAGAACCTACCATATC    | 40 |
| 5[248]  | 3[247]  | ATCAGTAGGCCACCACCGGAACCGACAGGAGG            | 32 |
| 7[200]  | 9[207]  | CCAAAAGAGGAAACGCAATAATACCAACGCTAACGAGCG     | 40 |
| 12[111] | 2[272]  | AGGAGGTTTAGAAACAAATAAA                      | 22 |
| 5[104]  | 7[103]  | AACCTCCGATAAGAATAAACACCGCAACATGT            | 32 |
| 13[216] | 11[223] | CCAAAAACAAAGGGTGAGAAAGGCTCAACCGTTCTAGCTG    | 40 |
| 26[303] | 27[295] | CAATCAATATCTGGTCTAAAGCAT                    | 24 |
| 31[112] | 29[119] | AGTGTGTCCAGTTTGAATCGGCCAACGCGCCGCTCACA      | 40 |
| 25[101] | 27[103] | TCGCATTAATGGTCACGTTGGTGTAGGCCTCAGG          | 35 |
| 5[280]  | 3[282]  | CGTCAGACATCTTTCATAATCAATTGATATTCAC          | 35 |
| 17[104] | 19[111] | CAGAGGCTACGGAGATTTGTATCAATATTCATTACCCAAA    | 40 |
| 17[216] | 15[215] | CAGTTCAGTATAATGCTGTAGCTCGTCTGGAA            | 32 |
| 25[264] | 27[263] | GTTATTAAGTTGAAAGGAATTGAGCCACGCTG            | 32 |
| 28[47]  | 16[336] | CTGCAGGTCGATTCGAGCTTCA                      | 22 |
| 7[37]   | 9[47]   | AGTATAAAGCCGGGTATTAACCAAGTACCGCGCCAATAGCA   | 43 |
| 7[232]  | 9[239]  | TTACGCAGGATAGCCGAACAAAGTTTTGCCAGTTACAAAA    | 40 |
| 23[224] | 25[231] | TGAATAATGGAAGGGTGAGCGGAATTATCATCCAAACAAT    | 40 |
| 29[328] | 31[335] | GGCAGATTAAGGGATTTTAGACAGTAATGCGCCGCTACAG    | 40 |
| 2[183]  | 1[199]  | TAACGATTACCTTTTACATCGGGAGGAGTGT             | 32 |
| 19[48]  | 17[55]  | CGCATAGGCTGGCTGATGCTCCATGTTACTTAGGGATCGT    | 40 |
| 7[312]  | 5[314]  | TAAGTTTAGGCGACATCAACCGACGGCATTTCG           | 35 |
| 25[152] | 23[159] | ATCAAAAAAACAGGAAGATTGTAACAAGAGAATCGATGA     | 40 |
| 1[256]  | 3[263]  | GTTAATGCCCCCTGCCTCCTCATTAAGCCAGGGTCAGAC     | 40 |
| 17[56]  | 16[48]  | CACCCTCAGTCGCTGAGGCTTGCA                    | 24 |
| 25[216] | 23[223] | AGACTTTAATATTCCTGATTATCAGTTTGGATTATACTTC    | 40 |
| 27[200] | 28[184] | CAGCAGAACATTAAAAATACCGAATGGGAAGG            | 32 |
| 29[120] | 27[119] | ATTCCACACAAGGCGATTAAGTTGACTCCAGC            | 32 |
| 4[303]  | 5[295]  | CTTATTAGCGTTTGCCTGTAGCGC                    | 24 |
| 9[176]  | 8[184]  | TTATCCTGAATCTTAAAACAACA                     | 24 |
| 5[69]   | 7[71]   | TTATCAAAATCAAAAAGCCTGTTTAGTGCTTAATT         | 35 |
| 5[216]  | 3[215]  | TCACCAATCACCTCAGAACCGCCAGAACCA              | 32 |
| 13[232] | 15[231] | CCTGTAATTCATACAGGCAAGGCACCATATAA            | 32 |
| 26[183] | 25[199] | ATTAATGTTCTGTAGCCAGCTTTACATTTG              | 32 |
| 5[264]  | 7[263]  | TCAAGTTTTATTCATTAAGGTGAGAAAATAC             | 32 |
| 18[15]  | 8[368]  | GGAACCGAACTTGAACAAAGTC                      | 22 |
| 1[128]  | 3[135]  | AATTGCGTAGATTTTCATCGCGCAGAGGCGAAACAAAATT    | 40 |
| 17[312] | 15[314] | AGGAAGCCAAGCAAACCTCCAACAGCCTGTTTAGCT        | 35 |

|         |         |                                          |    |
|---------|---------|------------------------------------------|----|
| 31[144] | 29[151] | ATTAAAGAACGTGGACGTCGGGAAACCTGTCGAGCATAAA | 40 |
| 12[183] | 11[199] | AGTACCAGATTAGGATTAGCGGGGACCATCAA         | 32 |
| 25[200] | 26[184] | AGGATTTAAGCCGTC AATAGATAATCATCAAC        | 32 |
| 2[111]  | 24[272] | CCTGAGCAAAATGAGTAACATT                   | 22 |
| 7[136]  | 9[143]  | AAGAGAATATAAGTCCTGAACAAGTTGAAGCCTTAAATCA | 40 |
| 7[168]  | 9[175]  | TAATTCTGTAATGCAGAACGCGCCTGCACCCAGCTACAAT | 40 |
| 28[183] | 27[199] | GCGATCGGCAGGCTGCGCAACTGTCGAACCAC         | 32 |

Table S3. Staple sequences of 14-helix bundle DNA origami (14HB).

| Start   | End     | Sequence                                               | Length |
|---------|---------|--------------------------------------------------------|--------|
| 2[464]  | 13[475] | GTAAAAATCACCGGAACACAGGAGCCGCGCT                        | 31     |
| 7[294]  | 2[297]  | AATCGTCCAGTAATATGCAGAAGAAACGAGACGGGGAAA                | 39     |
| 8[153]  | 0[147]  | TGTACCACGGTAATTGTGAGCTGCTGCAGCCTAATCAAAAAGCGT<br>CGAG  | 49     |
| 3[263]  | 0[252]  | AGAACCGAGCTCGAATTCACGATGTTTCGGAA                       | 31     |
| 13[245] | 2[252]  | CGTCTATCGTAATCCGAAGTACCAATTAGAAAAG                     | 35     |
| 11[224] | 8[217]  | TTGCATGATTTTTAGTTTTGAATCGTCATAAATAGTTTAGCAATC<br>ATA   | 49     |
| 0[62]   | 11[55]  | AGAACCGCAACGCCGAAAGACAGCATCGCGAAGGCACGCGCGCA<br>GGCAA  | 49     |
| 4[433]  | 7[440]  | ATCAAGAAAACCAAATGAAAAGCAATTCATCAATAAACAATATGG<br>GTTA  | 49     |
| 7[252]  | 8[238]  | AAGGTGGTTAGACTGGATAGCGTCCAATGGGCGCGTAGTAGC             | 42     |
| 11[56]  | 8[49]   | AGCGCCATCGTAACATTACAGTTTTAATTCGAGCTGCTTAGACAAT<br>GCC  | 49     |
| 11[329] | 8[322]  | AATGGATAGGTTATTCCTGAAGCCAACATGTAATTAGAATCCAAA<br>ACAA  | 49     |
| 13[392] | 4[392]  | AGGGAAGCACCGAGTAAGAGCTTTTATC                           | 28     |
| 4[265]  | 11[265] | TAGCAGCGTCCAGAAGAAAATTCGCATTATCCCCGGGTACCG             | 42     |
| 7[336]  | 2[339]  | CATAGCGTAACAACCAAGAAAGTTACAATAATTGAGCGA                | 39     |
| 2[317]  | 13[328] | GAAGGAAACGTCACCAATAATAAGATCGGAA                        | 31     |
| 11[455] | 8[448]  | GAATGGCACAGTGCAGCAAGCATAAACACCGGAATATATGTATTT<br>ACAT  | 49     |
| 2[251]  | 11[244] | GCTCCAAAAGGAGCAGGGAACATGGTCAGTCGACT                    | 35     |
| 4[391]  | 7[398]  | CTGAATCAATAATCAACCCTCAAGGAGCGGAATTAATAATCGTCA<br>TAGG  | 49     |
| 8[237]  | 0[231]  | ATTAACAAAATATTTTCAGCTCCCTGCAGTAGCTGTAAAGGGCACA<br>TGAA | 49     |
| 7[483]  | 2[486]  | AAAGAACCGTGTGAAATCATTAGAACGCGAAACCGCTTA                | 39     |
| 11[287] | 8[280]  | ACGCTCATTAGAGCTCAGCTAAAGAGAATATAAAGACCTTGCTTT<br>TTTA  | 49     |
| 13[350] | 4[350]  | TAGAGCTTAGCAATTATCAGAAGCCTAA                           | 28     |
| 2[107]  | 13[118] | CAGTAAAGTTTTGTCGTGGTGTATATGGTGG                        | 31     |

|         |         |                                                        |    |
|---------|---------|--------------------------------------------------------|----|
| 2[380]  | 13[391] | GAAGCCTTTAGCGTCAGTCTCTGAGAAAGGA                        | 31 |
| 7[42]   | 2[45]   | GCGGATGTCAAAGCAACGGAATGTGAATGCCACTAGAAC                | 39 |
| 13[476] | 4[476]  | TAATGCGAGCTAAACCAGAAGGAGGCGT                           | 28 |
| 0[272]  | 3[262]  | TGCCCCCAATTAGACCGTCACCGACTTGACAG                       | 32 |
| 7[168]  | 2[171]  | GTAGATTGAGAATGCCCTCGTCGGATATTAATTGTAGT                 | 39 |
| 8[447]  | 0[441]  | CGGGAGATAATCCTAGAGCCACAGACAAAGGAACGGTCACGCGG<br>CCTTG  | 49 |
| 8[27]   | 0[21]   | TTCAAAAATCAATAGACAGTATTCCGGCGGGCGCCCAACAGCCAG<br>GGAT  | 49 |
| 13[308] | 4[308]  | CCGTAAATAGAAGAACTGAACTCCCAAT                           | 28 |
| 0[398]  | 11[391] | AGCGCAGACTGTAGATTTTGTACAATCCCAATAATAAAGAATT<br>CTGG    | 49 |
| 8[300]  | 0[294]  | TCATTTGTGACAATAATAGATGGAAATCTATCGGTTGGGGTGAG<br>TAAC   | 49 |
| 4[223]  | 7[230]  | CAGGCGCCAAAAGAAACCAATAAGATTGTATAAGCTCCAATATAT<br>ATTT  | 49 |
| 7[273]  | 2[276]  | GTGAATATACCGACAATAAACGTCAAAAATAAAAAATTA                | 39 |
| 11[119] | 8[112]  | TATTACGTCCGTGGATAACGCCAGAAGCAAAGCGGTACGGTGCGG<br>GAGA  | 49 |
| 2[485]  | 13[496] | TTAACCACCGGAACCGCCAGAGCAGGGCGC                         | 31 |
| 8[174]  | 0[168]  | AGAGCATGTCAATCCCAGCTTGGTAACGATAAAGTGGGTTGACAG<br>TACC  | 49 |
| 13[266] | 4[266]  | ACGTGAACAATATTGAATAACATGAAAA                           | 28 |
| 11[245] | 4[245]  | CTAGAGGAAATTTTAGTAAATGTTTCTCTCTTTGAAAGAGG              | 42 |
| 0[83]   | 11[76]  | ACCCTCAGACAGCCGGGATCGTCACCCTAAAGAGGGCTGCATTTT<br>AGGC  | 49 |
| 4[454]  | 7[461]  | CGGGAGGGAGAACACACGCTGGATTGTTTGGATTAAGTACCTAAT<br>GCTG  | 49 |
| 11[77]  | 8[70]   | TGCGCAAACGTTGGCAGTTGACGAAAGACTTCAAATATAATGAAC<br>CCTC  | 49 |
| 11[350] | 8[343]  | GATTCACACAGTTGTCCCATCAGAATCGCCATATTATAGCTTGATG<br>ATG  | 49 |
| 13[413] | 4[413]  | GGGCGCTTGTTTTTTAGCAATCTATTTT                           | 28 |
| 4[286]  | 7[293]  | GTTTAAACAACATGTCGTCAATACTTTACAAACAATAATTACCTTCT<br>GTA | 49 |
| 7[357]  | 2[360]  | GACGCTGTTAATTGCTAATTTTTTCCAGGAGATAAACCA                | 39 |
| 11[476] | 8[469]  | GCGCGAATCAGTATTCGTAGGTAAATAAGGCGTTATCCAATCGAA<br>TATA  | 49 |
| 0[41]   | 11[34]  | ACCACCCTTTCGTCGGTAGCAACGGCTAGTAAAATGCGTATTACC<br>GCTT  | 49 |
| 2[275]  | 13[286] | TCAGCCAGCAAAATCACGTATAAACCAAATC                        | 31 |
| 13[56]  | 4[56]   | AGAGTTGTCGGCCAACCAACCTCAACTT                           | 28 |

|         |         |                                                         |    |
|---------|---------|---------------------------------------------------------|----|
| 4[412]  | 7[419]  | GCACCCAATCATTCCCTTGCTGATTCCCTGATTATCATTGCTTTTTTTT<br>AA | 49 |
| 8[258]  | 8[259]  | AATTCTATAATATTTTGTGATTTAGAACAGTACATAAAATTC              | 42 |
| 11[308] | 8[301]  | TTTTGACGGAGCACTGTTTATAGGCATTTTCGAGCGCTATTAAACA<br>ATT   | 49 |
| 13[371] | 4[371]  | GGCGAACCATCACGGAATTGACGCTAAC                            | 28 |
| 2[128]  | 13[139] | ATAGACGTTAGTAAATGATATAAGAAATCCC                         | 31 |
| 2[401]  | 13[412] | TTTCGCGTTTTTCATCGGAAGCCAGAAGGAGC                        | 31 |
| 7[315]  | 2[318]  | TTCCCTTAGGCAGCAACAATTTATTTAACCTGAGAGG                   | 39 |
| 7[63]   | 2[66]   | TGCTGAATATCGCGGTAGAAAATTTAAATTTAAACGCGAGC               | 39 |
| 11[161] | 8[154]  | TAAGTTGTCATCAAATCATAAACCATAAATCAAAAAATTCTGAAT<br>CGGT   | 49 |
| 13[497] | 4[497]  | GTACTATCCTCGTTGCAATAATATCCGG                            | 28 |
| 13[434] | 4[434]  | TGTAGCGGTACGCCAGCCCTTGCCTTAA                            | 28 |
| 0[293]  | 11[286] | AGTGCCCCAGTAGCTTCATTAAGGTGACAGGGAAGGTAATAAGG<br>AAAA    | 49 |
| 13[224] | 4[224]  | CAACGTCTCCTGTGACGGTCTACAGAC                             | 28 |
| 0[104]  | 11[97]  | CTCAGGAAACGATCGGAGTTAAAGGCCGAAAACACGTCGGGAGA<br>AGGGC   | 49 |
| 7[84]   | 2[87]   | TCAACATGGAAGCCGATTTAGAGTAAATATACACTCTTT                 | 39 |
| 7[189]  | 2[192]  | GATACATGCTTTAATAAAAACAAGAGTAACCTGCTTCTT                 | 39 |
| 11[266] | 7[272]  | CCAGCCAACATTTGCGACGACAAAAGGTAAAGTAACACAATATAT<br>GTGA   | 49 |
| 13[329] | 4[329]  | CCCTAAATAATAACCAGAGGGAATAAAC                            | 28 |
| 0[419]  | 11[412] | CTCATTACATTTTCAAGACACCACGGAAAATGAAAATAATCAACC<br>CTTC   | 49 |
| 8[48]   | 0[42]   | TGAGTAATCTAGCTCTGCCAGCGGAAACGGGAGAGCGCCTGGCAG<br>AGCC   | 49 |
| 7[21]   | 1[27]   | TTTTGATGCAAACCTTCTACGTTAAGAATAAACGGCAGAGGCACC<br>GTAA   | 49 |
| 8[321]  | 0[315]  | AATTAATTTTGGCCATCTTTAGCTCAATGCCTGAGGCACTAATTTT<br>AAC   | 49 |
| 4[244]  | 7[251]  | ACAGATGGGGTAATTGTTAAATAAAATTGTAAACGTCTAATAGAGC<br>TGAA  | 49 |
| 11[392] | 8[385]  | CCAACAGAATATCAGGCTGTCCTTACCAGTATAAAATCAAAACGC<br>AGAG   | 49 |
| 13[455] | 4[455]  | AACCACCAAGGGATGCAGATACGACTTG                            | 28 |
| 2[86]   | 13[97]  | TGCCTCATAGTTAGCGTGGTTTAGAGCAGGC                         | 31 |
| 0[314]  | 11[307] | GGGGTCACAAGGCCGGTAAATATTGACGAGAATTAACCTCAAAACC<br>TACA  | 49 |
| 8[195]  | 0[189]  | AAAATTATGATAATTCGCGTCGTCACGACACAACATGGAACATAG<br>GATT   | 49 |
| 13[287] | 4[287]  | AAGTTTTCCCTTGCTGCGCATTATTTTTT                           | 28 |

|         |         |                                                        |    |
|---------|---------|--------------------------------------------------------|----|
| 8[279]  | 0[273]  | ATGGAAAGTATTAGAGATAATTTGCAACTCCAGAACCATCACCAG<br>TTAA  | 49 |
| 4[475]  | 7[482]  | TTAGCGATTTTCATAACACCGAATAATGGAAGGGTCAGATGCA<br>AGAC    | 49 |
| 11[140] | 8[133]  | GGGGATGGAGTAACAGGCATACTTTACCCTGACTATCCATATTAT<br>GACC  | 49 |
| 11[98]  | 8[91]   | GATCGGTTTGACCGACATTCACAAAAAGATTAAGAGTTTTAACGC<br>AAGG  | 49 |
| 2[191]  | 13[202] | AAAGTGAGAATAGAAAGGAAGGATAGAGTCC                        | 31 |
| 4[307]  | 7[314]  | CCAAATAACGCGCCTAACAACTCGTATTAATCCTACATTTATTA<br>ATT    | 49 |
| 7[105]  | 2[108]  | ACTAAAGATTGCATACTAATGACGAGAATGACCCCTTG                 | 39 |
| 7[378]  | 2[381]  | TGAATTTGCCAACGACCAATCTTACCAAGTTAAGCAATA                | 39 |
| 4[34]   | 7[41]   | TGCGATTTAATAAAGGACGACTGATATCAACCGTTGTGTAGCATT<br>TTT   | 49 |
| 0[335]  | 11[328] | GTACTGGTGAAACCTCAACCGATTGAGGACAAAGTATCACTTCGT<br>CTGA  | 49 |
| 11[497] | 8[490]  | ACATCGCGATAAAACCAATAGTTTGAAATACCGACGCGAGAATTT<br>TCAG  | 49 |
| 4[160]  | 7[167]  | CCAAATCCAACACTCATTAAACGTAAACTAGCATAAAGCTACGA<br>ACGA   | 49 |
| 13[77]  | 4[77]   | CGCTGGTCGTGCCACAAAAGATGGGCTT                           | 28 |
| 0[167]  | 11[160] | AGGCGGACTAAACAGCCGACAATGACAAGTATCATCTGGGGTAGG<br>CGAT  | 49 |
| 0[482]  | 11[475] | AGCATTGCAGAGCCCGCAGTATGTTAGCAAAGTTACAGGAGGCTT<br>TAAT  | 49 |
| 2[149]  | 13[160] | CATTGTATGGGATTTTGTAAGTGCAATAGCC                        | 31 |
| 2[422]  | 13[433] | GCAGGTCATAGCCCCCTCAAACAATGGCAAG                        | 31 |
| 8[111]  | 0[105]  | AGCCTTTGTCATTGCGGCGGAGCGGGCCCTGCCCGCTGTTTGCACC<br>GTA  | 49 |
| 8[384]  | 0[378]  | GCGAATTCCACCAGAATCAATAAGGGACGTCTGTCGTGGCGAATT<br>TACC  | 49 |
| 11[182] | 8[175]  | TTTCCCATGGCCTTACGACGAACAGTTCAGAAAACTAGTTTGAAG<br>CCTC  | 49 |
| 0[125]  | 11[118] | CGGAATACTTTCCATTTCGGTCGCTGAGGCAGCGATGCGCTCATCTT<br>CGC | 49 |
| 7[210]  | 2[213]  | ATAACCTTCATTGGCTTTTGATAGGCTCGGAACGAGCT                 | 39 |
| 0[440]  | 11[433] | ATATTCATATTAGCGCAACATATAAAAAGTTACCGAAGAATCCAAG<br>AATA | 49 |
| 8[69]   | 0[63]   | ATATATTGGAGAGGGGGCGCATTGCCATAATGAACAGCAAGCAC<br>CCTC   | 49 |
| 8[342]  | 0[336]  | AAACAAATTAAGTTGAGGATATTTACTGATTAGGGGAGCCCAG<br>GAGT    | 49 |

|         |         |                                                        |    |
|---------|---------|--------------------------------------------------------|----|
| 13[182] | 4[182]  | TCCAGTTTACGAGCATCCGCGATCTTGA                           | 28 |
| 11[413] | 8[406]  | TGACCTGGCATCACCAAGAACATCATATGCGTTATGACTACCGAA<br>TACC  | 49 |
| 8[468]  | 0[462]  | CAGTAACTACTTCTGCCTGCATATTAGTCCGATTAACACCCGGTTG<br>AGG  | 49 |
| 7[441]  | 2[444]  | TATAACTCATAATTACTCATCTTTTGAATTAAGAAAAG                 | 39 |
| 4[97]   | 7[104]  | AACGAGTGAATACCTAATGGGACAAAGGCTATCAGATTTCAAATA<br>TGCA  | 49 |
| 2[338]  | 13[349] | CATATCGATAGCAGCACGATGATACCCGATT                        | 31 |
| 13[140] | 4[140]  | TTATAAAGAGTGAGTACAACGCAAAGCT                           | 28 |
| 4[496]  | 7[503]  | TATTCTAACCGCGCCAGAGGTCTACCATATCAAAAAGCGTAGAAAC<br>TTTT | 49 |
| 0[230]  | 11[223] | AGTATTAATAATAATGTATCGGTTTATCAGGCGCAGTGAAATGCC<br>AAGC  | 49 |
| 2[212]  | 13[223] | TGCTAAAGGAATTGCGAAGAGGCTTGGACTC                        | 31 |
| 4[328]  | 7[335]  | AGCCATAAGATAAGCTAAAATGAACGTTATTAATTCATCAAGTTG<br>AAAA  | 49 |
| 7[126]  | 2[129]  | GTTTCATTTATAGTCAAAAAGGCAGTGAAAAGCGCGACGAT              | 39 |
| 7[399]  | 2[402]  | TCTGAGAACAAATTTTTCCCTTGCTACAAAAGAACTAAG                | 39 |
| 4[55]   | 7[62]   | TAATCATCAACATTCGTGCATGATAAATTAATGCCTTAAATGGCTT<br>AAT  | 49 |
| 0[356]  | 11[349] | GGCTTTTCGTAATCCCAAAGACAAAAGGGCGCTAAACTTCTTATTG<br>GCA  | 49 |
| 2[44]   | 13[55]  | GAGACCAGTACAAACTACCACCCTCCCTGAG                        | 31 |
| 13[98]  | 4[98]   | GAAAATCCTTTCCATCATCTTACACCAG                           | 28 |
| 4[181]  | 7[188]  | CAAGAACTTACCAGCCTGTAGATATGTACCCCGGTAGCAATAACC<br>ATTA  | 49 |
| 0[188]  | 11[181] | AGCGGGGCAGCGGACAGCTTGATACCGATGTCGAACGGAAGCCC<br>AGGGT  | 49 |
| 0[503]  | 11[496] | ACCACCACTCCCTCCATGATTAAGACTCAGGAAACAGAATCACCC<br>TAAA  | 49 |
| 2[170]  | 13[181] | TGCACTTCAACAGTTTTTTTGTGCTGTGTGT                        | 31 |
| 2[443]  | 13[454] | GTGGTTTGCCATCTTTTGACGATTTGCGCGT                        | 31 |
| 8[132]  | 0[126]  | CTGTAATGCAAACACGGATTCCCAGCTGACATTAAATCGGCATAT<br>AGCC  | 49 |
| 8[405]  | 0[399]  | AAGTTACTCATCATAACCTCAAGATAGAGTGAGGCAAAGCGAAAT<br>GGAA  | 49 |
| 11[203] | 8[196]  | AAACGACCCATCAAGCGAGAGAATCCCCCTCAAATTTTCGCAAAAT<br>TAGC | 49 |
| 0[146]  | 11[139] | AGGGTTGAATTTTCCGCCACGCATAACAACAAAGCTAACTCGCG<br>AAAG   | 49 |
| 7[231]  | 2[234]  | TCATTTGACTGCGGCCAGAGGAACGGTGAATCATACTTT                | 39 |

|         |         |                                                        |    |
|---------|---------|--------------------------------------------------------|----|
| 11[35]  | 8[28]   | CTGGTGCTTTGAGGACGAACTGAACCAGACCGGAAAAGAGGTGTA<br>AAGA  | 49 |
| 0[461]  | 11[454] | CAGGTCACATAATCGAAAATACATACATAAAGTAATTTAGACTAT<br>TTTT  | 49 |
| 8[90]   | 0[84]   | ATAAAAAGAGATCTATAGGTCCTGTTGGAACCTGTTTGCCCCTACC<br>GCC  | 49 |
| 8[216]  | 0[210]  | CAGGCAAAAACAGGAGGAACGGGCCAGTTGTTATCAAGAACGGA<br>GACTC  | 49 |
| 1[28]   | 4[35]   | CACTGAGTCATTTTTGATTGCCCTCACGCGGTTTACGTAATTACC<br>TTA   | 49 |
| 8[363]  | 0[357]  | CCTGAGCTCATTTCAAATCACAGTCACACCGTTGTGACGGGCATA<br>CAT   | 49 |
| 13[203] | 4[203]  | ACTATTACGCTCACACTTAGCGGCTGAC                           | 28 |
| 8[426]  | 0[420]  | CGCCTGAGATGATGATCTAAAAAGCGTTGAGAAGAGGGCGCATA<br>AATC   | 49 |
| 11[434] | 8[427]  | CGTGGCAGCAGCAAGTACCGCACTAGAAAAAGCCTCTTAGGTACG<br>GATT  | 49 |
| 1[504]  | 0[504]  | AGAGCCGCCACCCTGAGCCGCCACCAGA                           | 28 |
| 8[489]  | 0[483]  | GTTTAACTTAGAACGAGGCGGCTGATAGGAGCGGGCCGCTACCGC<br>CGCC  | 49 |
| 7[462]  | 2[465]  | ATGCAAAAATAAGACGTTTTTAACTCCGCCGAACAAAC                 | 39 |
| 4[118]  | 7[125]  | TGCCCTGCAGATACGAACAAACCTGAGAGTCTGGAACTTTTGTCT<br>GGAA  | 49 |
| 2[359]  | 13[370] | GCGAGTAGCGACAGAATTAAGCGTGAAAGCC                        | 31 |
| 13[161] | 4[161]  | CGAGATAGTAAAGCCGCTGATCATTAC                            | 28 |
| 0[251]  | 13[265] | CCTATTAATCTCCAAAACATTTGGGTGCCTATGCCCACT                | 42 |
| 4[370]  | 7[377]  | GAGCGTCACGAGCACAGTTGGGCGGAACAAAGAAAATTCATTTCA<br>ATAG  | 49 |
| 11[371] | 8[364]  | GTAATAAATCTGGTTGTAGAACTCAACAGTAGGGCAGAAGAGTCA<br>ATTA  | 49 |
| 4[139]  | 7[146]  | GCTCATTAAATTACGAACCCGTAGAGAATCGATGAAAAAACATAAC<br>AGTT | 49 |
| 2[233]  | 13[244] | AATTTTTTTCACGTTGATTCTGAAGAAAAAC                        | 31 |
| 4[349]  | 7[356]  | TTTGCCAAATAATAAAAGGAATTTGAGTAACATTA AAAAGAAAGA<br>TTAA | 49 |
| 7[147]  | 2[150]  | GATTCCCATCAGGTGTAAGAGAACGTAAGAGATTTCAAC                | 39 |
| 7[420]  | 2[423]  | CCTCCGGGTTTAGTGGGTATTTTAGTTGAGCTATCAAAC                | 39 |
| 4[76]   | 7[83]   | GAGATGGGATTCATTGTAGATGTAGCTATTTTTGATTTTTAGCTGT<br>AGC  | 49 |
| 0[377]  | 11[370] | GTCCAGCAAGTTAATTCATATGGTTTCCACAACAAATTAACGA<br>CCA     | 49 |
| 2[65]   | 13[76]  | AGCTGTAGCATTCCACAGAACCGCCGTCCA                         | 31 |
| 13[119] | 4[119]  | TTCCGAATTGCGTTTATACCATAAGGCT                           | 28 |

|        |         |                                                        |    |
|--------|---------|--------------------------------------------------------|----|
| 4[202] | 7[209]  | CTTCATCCAAAATAAAATAATCAGAAAAGCCCCAAGGCCAAAGATG<br>GTCA | 49 |
| 0[209] | 11[202] | CTCAAGAGAACAACCTTCGAGGTGAATCCATGTTAATTCCACGTT<br>GTA   | 49 |
| 2[296] | 13[307] | TTAACCATTACCATTAGGTGCCTTCGAGGTG                        | 31 |

Table S4. Staple sequences of ring-shaped DNA origami (RDO).

| Start   | End     | Sequence                                       | Length |
|---------|---------|------------------------------------------------|--------|
| 11[399] | 6[399]  | GGGAGCCCCGGAGTCGAGAGCTCAGTAGAAGGATGTATTAAG     | 42     |
| 2[454]  | 11[461] | TTGAGCCGGTGAATTCACCGGCGGTACGCCAGA              | 33     |
| 6[167]  | 7[174]  | TTCAGCTTCCGGCACTCGCCATTCAACGTTAATATT           | 38     |
| 9[84]   | 1[104]  | CAGCAACCGCAACCAGAGCACAAACGTCAAGGATAG           | 35     |
| 1[21]   | 3[678]  | GCCAACGCCAGGGTGGTTGTAAGAATACGTGGCCCCCTCTGA     | 41     |
| 7[175]  | 3[188]  | TGTTAACTATCAGGTCGATGAAAAATTCA                  | 29     |
| 0[300]  | 11[314] | CTCATTCTTTATGCGATTTCTTGACCGCCGCGCTTAAT         | 38     |
| 5[49]   | 6[42]   | GTAAAGCCGCCAACATACGAGCCG                       | 24     |
| 3[105]  | 5[90]   | ATTTGCCAAAATCCCCTAACGGGGTCATTGCAGGGCGGAGGTGT   | 45     |
| 9[336]  | 1[356]  | GGTCGCTGAGGCAACAGCTTGCCATCGCTTATCTA            | 35     |
| 11[525] | 6[525]  | CACGCATGCGGGAGGCGTTGCTTATCAATAGCAATCATCGTA     | 42     |
| 6[104]  | 4[119]  | GCTGATTAGAAAAAGCCGCACAGGCGGCCTTTAGTGGGTGTACATC | 46     |
| 6[503]  | 7[510]  | CATGAAATAGCAATAGCAGATAGCCCCTGAATCTTACC         | 38     |
| 11[210] | 0[203]  | AAGGAACTGAAAAGGTGCATTTAAAATTCA                 | 31     |
| 0[552]  | 11[566] | CTAATGATGACAATAACAAGTATATACTTCTTTGATT          | 38     |
| 7[427]  | 3[440]  | GAGCCGTCAGACTGTCCCTTATTGGAGCC                  | 29     |
| 11[84]  | 0[77]   | TCACCCTGCTGGTCTGGACAAACATCCCTGC                | 31     |
| 11[483] | 6[483]  | TAATCACTGGCAAATAATATACCAGAAAAGTAAGCTATCTTA     | 42     |
| 9[630]  | 1[650]  | TTTAGAAGTATTTCTAAAATAAGCCGTCTAGCCCT            | 35     |
| 6[251]  | 7[258]  | TTTACGGTGTCTGGAAGCGAACGAGAAACGAGAATGAC         | 38     |
| 1[63]   | 3[48]   | CTTTGCTCAGCAAATCGTTAATTGCGTTGCGCGTAGGAGCT      | 41     |
| 0[328]  | 0[301]  | GCCACTACGAAGGCACCAGAACTGG                      | 25     |
| 11[672] | 0[665]  | GAAAAAGAAATACCTACCATAAAAAAGTCTT                | 31     |
| 5[595]  | 6[588]  | TGTAAATCTCTATATGTGAGTGAA                       | 24     |
| 6[440]  | 4[455]  | CCTTAGTGGAACCATCGATAGCAGCACCGTAATCGACATTAGCA   | 46     |
| 0[580]  | 0[553]  | AGTGAATTTATCAAAATATGTTTCAG                     | 25     |
| 5[259]  | 6[252]  | ATTATAGTGATCAAAAATCAGGTC                       | 24     |
| 11[420] | 0[413]  | CGATTAACCGCCTCCCTTATCATACAATGGA                | 31     |
| 9[546]  | 1[566]  | AGTAGGGCTTAACTAGAAAAATCTTACCACCATAG            | 35     |
| 3[147]  | 5[132]  | TAGATGGGACGACGACAGTAGGATAACCTCACCGGTGTGGAGCCG  | 45     |
| 6[188]  | 4[203]  | CTACAAATTGTTCTAGCTGATAAATTAATGCCGGAGAACAAATCAC | 46     |
| 3[21]   | 5[678]  | TTTACCCCCTGGCCCTGAGACAGAGATAGAACCCTGCAAGGGACA  | 45     |
| 9[210]  | 1[230]  | CAATTCTACTAAATTTTCGCAATTTGGGGTGGAAAGC          | 35     |
| 3[553]  | 2[539]  | TAAAGTATATTGAGAATCGCCATATTTATGGCTGTCTTATCCC    | 43     |

|         |         |                                                    |    |
|---------|---------|----------------------------------------------------|----|
| 9[294]  | 1[314]  | ATTACCCAAATCGTGTACAGAGAGTAATTAACCT                 | 35 |
| 1[189]  | 3[174]  | AACCCTGTGTAGGTAAAGTTCGCGTCTGGCCTGAGCGCCAT          | 41 |
| 3[679]  | 8[672]  | CCTGAAAGCGAGTCTGAAATGGA                            | 23 |
| 5[175]  | 6[168]  | AGCTCATTGGAATTCGCATTAAT                            | 24 |
| 6[125]  | 7[132]  | GAATGAAGGGTAAAGTTCGTTTTTCGTTGTAACCGA               | 38 |
| 6[524]  | 4[539]  | GGAATCAACAAGTACCGCACTCATCGAGAACAAGCATCTTATCATT     | 46 |
| 2[496]  | 11[503] | AATTAACCAGGGAAAAAGAAGTGAGGCCACCG                   | 33 |
| 9[126]  | 1[146]  | TGGGTAACGCCAGATCGGTGCAGGGGGACCCGGAT                | 35 |
| 11[105] | 6[105]  | TGGGGTTTGTAGATCCTCACGCTGGCAAACGCGGTAAACGAT         | 42 |
| 3[511]  | 2[497]  | TTATCCCCTACCCAGCTACAATTTTATGAGAGCGCTACGGGAG        | 43 |
| 11[504] | 0[497]  | AGTAAATTAATCAAGACCGCGCATAATAGC                     | 31 |
| 6[272]  | 4[287]  | ACCAGACCAAAAGGAATTACGAGGCATAGTAAGAGCCAATTCAAC<br>T | 46 |
| 1[399]  | 3[384]  | GTTCCAAGGAGTGTACTGCGTCACCAGTACAACGCAGTAAC          | 41 |
| 7[217]  | 3[230]  | CAGGCAAGTTGATTCATTAGATAAATAAG                      | 29 |
| 0[342]  | 11[356] | AAAATAAAGGAAGTTTCCACCACGCGGTTGCTTTGACG             | 38 |
| 5[91]   | 6[84]   | CCAGCATCGCCGCAACCAGCTTAC                           | 24 |
| 9[378]  | 1[398]  | TAGTACCGCCACATAAGTGCCATAGGTGTGTACC                 | 35 |
| 6[461]  | 7[468]  | CGAGTAGCGACAGAATTCATCGGCGTGGAACATATA               | 38 |
| 9[42]   | 1[62]   | GGTCATAGCTGTGTTCTTCGCCGGTACTTGGTTT                 | 35 |
| 0[594]  | 11[608] | AGAAGATAATAGCTTAGATAAAACAAAGAAGAACTCAAA            | 38 |
| 2[580]  | 11[587] | CTTAGGTGAGACTAGCGTTATAACATCACTGC                   | 33 |
| 7[469]  | 3[482]  | AAAGAATTTTTAAGAAGGAAACCAACAAA                      | 29 |
| 11[441] | 6[441]  | CAGGAAAACAGATCTTTTCATAGCCAGCGGTTCAAGTTG            | 42 |
| 5[343]  | 6[336]  | AACGAGGGAGCCCTCAGCAGCGAA                           | 24 |
| 6[209]  | 7[216]  | CAAGGGTAGCTATTTTGAGAGTCTGCCAATAAATCATA             | 38 |
| 9[672]  | 1[20]   | TGACGCTCAATCTAGGGTTGAATTAAGAATCG                   | 33 |
| 2[664]  | 11[671] | ACCACCATCGCCATACTAATACCATTGCAACAG                  | 33 |
| 0[412]  | 0[385]  | AAGCGCAGTCTCTGAATTAGCATTC                          | 25 |
| 3[595]  | 2[581]  | TTAGAATTTGAATTACCTTTTTTAATGAGCAAATCCACTCCGG        | 43 |
| 0[370]  | 0[343]  | TCATAGTTAGCGTAACGAAACGGGT                          | 25 |
| 1[147]  | 3[132]  | TCTCCGGATAGGTCACGTACGTACAGCGCCATAGGTAAACA          | 41 |
| 3[133]  | 2[119]  | ATCGGCGGCGGGTTTTCCAGTCACGATCGTTGGGCGAAACAG         | 43 |
| 5[637]  | 6[630]  | AGTTTGAGTCTTTGCCGAACGTT                            | 24 |
| 6[146]  | 4[161]  | GTGCCGACTCGGCCTCAGGAAGATCGCACTCCAGCTTCTGCCAGT      | 46 |
| 6[545]  | 7[552]  | TTAGCCGTTTTTATTGCAAATCAGAACAACGCCAACA              | 38 |
| 0[622]  | 0[595]  | GCAATTCATCAATATAAAGACGCTG                          | 25 |
| 9[588]  | 1[608]  | ACAATTCATTTCAATATCAAGATATCCTG                      | 35 |
| 11[126] | 0[119]  | AAGCACGCAAGGCGATTGTAGAGACATAGAC                    | 31 |
| 1[357]  | 3[342]  | AAGTTTTTCTGTATGGGAGACTTTTCATGATAGTGCTTT            | 41 |
| 3[525]  | 5[510]  | ACCAATCCGGGTATTAACCAAAATAAACAGCCATATGCCTAATT       | 45 |
| 11[567] | 6[567]  | AGTAATACAAATGCCTGTTACCGGAAAAATAAGGATGGTTTG         | 42 |
| 6[335]  | 7[342]  | AGATGTTACTTAGCCGGAAGTACCCGCTTTTGCGGGA              | 38 |

|         |         |                                                    |    |
|---------|---------|----------------------------------------------------|----|
| 9[252]  | 1[272]  | ATCCCCCTCAAAGGGGTAATACTGCGGATAAAAAA                | 35 |
| 0[426]  | 11[440] | AGCCAGATAAAACAAATAAAACCGGAAAGGGATTTTAGA            | 38 |
| 6[482]  | 4[497]  | CCGAAGCACAAGCCCAATAATAAGAGCAAGAAACAAGACAGAGA<br>GA | 46 |
| 5[217]  | 6[210]  | ATAAAGCCACAGGCAAAGAATTAG                           | 24 |
| 6[293]  | 7[300]  | ACAACACTATCATAACGCGAGAGGCATTTCAGTGAATAA            | 38 |
| 11[462] | 0[455]  | ATCCTGTTATTACGCAGAATATCACGGAAGG                    | 31 |
| 2[538]  | 11[545] | ATCCTAACTGAACACCCGACTAATTAACCGTTG                  | 33 |
| 6[230]  | 4[245]  | CCATATATCCAACATGTTTTAAATATGCAACTAAAGTACTTAATTG     | 46 |
| 9[168]  | 1[188]  | AAGATTGTATAAGTAATCGTATGATAATGCTTTAG                | 35 |
| 3[49]   | 2[35]   | AACTCACCTTTCCTGTGTGAAATTGTTTACGGGCAACTTGCGT        | 43 |
| 1[105]  | 3[90]   | CTCTCAAACCTAAATTCATCCGCCGGGCGCGCTCACGCTT           | 41 |
| 3[609]  | 5[594]  | AATTATTTTTTCAGGTTAACGCTATTAATTAATTCGCTTGCTTC       | 45 |
| 7[259]  | 3[272]  | CATAAACGATAAAAATTGCCAGTTAGATT                      | 29 |
| 0[454]  | 0[427]  | TAAATATTGACGAAATCTCATTA                            | 25 |
| 5[133]  | 6[126]  | CCACGGGAAAGTGCCAAGCTTCA                            | 24 |
| 9[420]  | 1[440]  | GCCGCCACCCTCGCGTTTGCCAGCCACCTCTATTC                | 35 |
| 1[315]  | 3[300]  | AAAACGATCTTTGACCCCCATTGTGAATTACCAACCATTTC          | 41 |
| 3[175]  | 2[161]  | CAAAAATCGGCAAAATTTAAATGTAAAGGTAACCGTTTGACC         | 43 |
| 3[441]  | 5[426]  | AGCAAAAAACGTCACCAATACAGGAGGTTGAGGCGAGAGCCGCC       | 45 |
| 6[650]  | 4[665]  | CCCTCAATAAGCAAATGAAAAATCTAAAGCATCACCAACTGCAACA     | 46 |
| 4[202]  | 9[209]  | CATCAATGAGAAAGGCAAAACACATGTCAATGCAT                | 34 |
| 6[566]  | 4[581]  | AAATACCAACAAATATATTTIAGTTAATTTTCATCTTACCAAGACAA    | 46 |
| 0[118]  | 0[91]   | TTTCTCCGTGGTGAAGGCCGGGTCA                          | 25 |
| 0[636]  | 11[650] | TATCAGTGAATTATCATCAAATAGAAGAACAATATTAC             | 38 |
| 7[301]  | 3[314]  | GGCTTGTCATCATAAGATGAAATCAGCG                       | 29 |
| 7[511]  | 3[524]  | AACGCTACCGCGCCCCGGTATTAATAGAA                      | 29 |
| 4[580]  | 9[587]  | AGAACGCGCTGATGAATAAACTAGTATCATTTTA                 | 34 |
| 5[385]  | 6[378]  | CAAGCCCAGAGCCACCACCCTCAT                           | 24 |
| 11[147] | 6[147]  | TAAAGGGGCGAAGGGCCTCAACTGTTAGCGCCATCGCTTCTG         | 42 |
| 2[118]  | 11[125] | CGGATCACGAAAAGCCGACCGAGGTGCCGTA                    | 33 |
| 3[273]  | 5[258]  | CATCAGTATACATAACGCCAGAAGCAAAGCGGATTAGCCCTGACT      | 45 |
| 11[546] | 0[539]  | TAGCAAAAGCCAACGCTCTAGAAAACAGAAC                    | 31 |
| 11[588] | 0[581]  | CTGAGTAATTAATTACAATCCTTTTGTCAAT                    | 31 |
| 4[622]  | 9[629]  | GCGTAGATGCACGTAAATCGCGCAAAAGAAAGGA                 | 34 |
| 6[356]  | 4[371]  | CTCCAAATAGGAATTGCGAATAATAATTTTTTACGTCGGAGTGAG      | 46 |
| 4[496]  | 9[503]  | TAACCCAGGTAATTACAAAGTACGGAATACTTAG                 | 34 |
| 3[399]  | 5[384]  | AAGTTTTTAAACAGTTAATGAGGAACCCATGTACCGCAGGGATAG      | 45 |
| 11[336] | 0[329]  | TACTATATAACCGATATGCCAAAAGCGTAAT                    | 31 |
| 0[34]   | 0[679]  | TGCCAGCTGCATTAATGTTGAATG                           | 25 |
| 2[370]  | 11[377] | AATGAATTGTCGTCACAATGATATAACGTGCTT                  | 33 |
| 5[679]  | 6[672]  | TTCTGGCCAATGTCACACGACCAGTA                         | 26 |
| 1[231]  | 3[216]  | AAACTCTTGCTCCTTTTGAACATTATGACCCCAACAATCGG          | 41 |

|         |         |                                                |    |
|---------|---------|------------------------------------------------|----|
| 0[664]  | 0[637]  | TAATGCGCGAACTGATATTCCTGAT                      | 25 |
| 2[34]   | 11[41]  | ATTGGGCGCGCGGGACAAGAGCAAAGGGCGAAA              | 33 |
| 3[231]  | 5[216]  | AGGTCATTAATGCTGTAGCTAGAGCATAAAGCTAAGTATTAAGCA  | 45 |
| 7[91]   | 3[104]  | ATCCCACGTTCCGGCAGCCTCCCATGCTC                  | 29 |
| 0[216]  | 11[230] | GCCTTTTGTGTAATACTTTCGCGAGGGGAAGAAAGCGA         | 38 |
| 3[63]   | 5[48]   | GCATCAGCCCCTGCATCAGAGGGTGCCTAATGAGTCTCATAAAGT  | 45 |
| 4[412]  | 9[419]  | GCCCCGTAACGGGGGGTTTTGGGTTGATACAGA              | 34 |
| 1[441]  | 3[426]  | ATAAAAATTTGGGAATTAGCCTTGATATTCACGGTTAGGTC      | 41 |
| 11[273] | 6[273]  | CACGCTCCAATAGTAAAATAGAAGTTCCAAAATACCTCGTTT     | 42 |
| 2[286]  | 11[293] | AACATTATTAATAAATAGCGTGCAGGTAACCAC              | 33 |
| 6[41]   | 7[48]   | GATTGCCCCAGCAGGCAAAATCCCTATCCGCTACAAT          | 38 |
| 0[468]  | 11[482] | AGGGAGCGAGGGCGACATTGACTCCAGAAGTGTTTTAA         | 38 |
| 7[343]  | 3[356]  | TCGTCAGAGCCTTTAAATTTCTAAATTTT                  | 29 |
| 4[76]   | 9[83]   | CCGGTGCATGCCGGGGTTTCTAGCCTCCTCTCAG             | 34 |
| 4[664]  | 9[671]  | GTGCCACCGGTCAGTTGAAAGGAGCACTAAATTT             | 34 |
| 11[21]  | 6[21]   | CAACGTTCCACTGTGTTGTAAAGAATAAATCGGCGAAAATCC     | 42 |
| 3[189]  | 5[174]  | AAAGGGTATGATATTC AACCTTAACCAATAGGAACATGTAAATC  | 45 |
| 6[587]  | 7[594]  | TACTGACCTAAATTTACGTTAAATAGAAACAGTACATA         | 38 |
| 0[132]  | 11[146] | TGAGAGGCGTTTACCAGTCTGTGCTTAAATCGGAACCC         | 38 |
| 1[651]  | 3[636]  | AAAACAGCAGAAGATAAAACCAGAAGGAGCGGAAAAGGAAC      | 41 |
| 4[328]  | 9[335]  | TTTGTATCAAGCGCCTTTGAACATAGGCTGATTC             | 34 |
| 5[301]  | 6[294]  | AGTAAATTGGCCCTGACGAGAAAC                       | 24 |
| 11[168] | 0[161]  | TAGAGCAGCCCCAAAAACAACGGAATGTG                  | 31 |
| 0[244]  | 0[217]  | CAAAGCGAACCAGACCGCGGGAGAA                      | 25 |
| 7[637]  | 3[650]  | AAATCCAATATCTGGGGAAGGTCCACAGA                  | 29 |
| 11[609] | 6[609]  | CTATCGACAAACTACCTGAGCAGAGGCTTTGAATGAAACAAT     | 42 |
| 5[511]  | 6[504]  | TGCCAGTTTTAACGAGCGTCTTTC                       | 24 |
| 6[377]  | 7[384]  | TTTGAAAATCTCCAAGGTTATCACAGAACC GCCACC          | 38 |
| 1[567]  | 3[552]  | GTCTGATGGGTTATATAATCTGTCCAGACGACAATTAAGG       | 41 |
| 0[496]  | 0[469]  | AGCCTTTACAGAGAGAAACCGATTG                      | 25 |
| 11[357] | 6[357]  | AGCACGCAACAAATACCGACGAGGTGATTGTATCAAAAAGG      | 42 |
| 0[48]   | 11[62]  | GGAAACCGTCACTGCCCGCCGAGCTCTATCAGGGCGAT         | 38 |
| 9[462]  | 1[482]  | TTAGCAAACGTAAGGAAACGCTGATTAACATAACA            | 35 |
| 2[160]  | 11[167] | GTAATGGTGGGAACGCCAGCTGAGCCCCGATT               | 33 |
| 3[357]  | 5[342]  | GCTAAACAGGAACAACCTAAAGCAACGGCTACAGAGACAGCATCGG | 45 |
| 4[244]  | 9[251]  | CTGAATATTTTGC GGATTAGATAACCTGTTTGA             | 34 |
| 0[160]  | 0[133]  | AGCGAGTAACAACCCGTGGAATTTG                      | 25 |
| 0[678]  | 11[20]  | GCTATTTACACAGACAATATTAACATGCGCTCGTGGACTC       | 40 |
| 7[553]  | 3[566]  | TGTAATCCGTGTGATT CATAATATCTATA                 | 29 |
| 2[622]  | 11[629] | AAGGGTTTGGATTATGATGAAGCCTTGCTGGTA              | 33 |
| 5[427]  | 6[420]  | GCCAGCATCGCCACCAGAACCACC                       | 24 |
| 3[343]  | 2[329]  | GAGGACTTATTGCAGGGAGTTAAAGGCAAGAAACAAACTAA      | 43 |
| 3[637]  | 2[623]  | AAAGAAATAAGACTTTACAAACAATTCCAAAACAGATAATGG     | 43 |

|         |         |                                                    |    |
|---------|---------|----------------------------------------------------|----|
| 6[314]  | 4[329]  | CGCAGACGGATTGTGTCGAAATCCGCGACCTGCTCCACAACGGAG<br>A | 46 |
| 11[294] | 0[287]  | CACACCAAGAACCGGATGGAACGAAATACCA                    | 31 |
| 4[538]  | 9[545]  | CCAAGAAAATAATCATAGAAGTTAGCGAACCAAC                 | 34 |
| 6[62]   | 4[77]   | CCAGAATTGCGATCCAGCGCAGTGTCACTGCGCGCCCTCAGCGGTG     | 46 |
| 0[76]   | 0[49]   | GGCTGGTAATGGGTAAATCCAGTCG                          | 25 |
| 2[412]  | 11[419] | ATGATACGTAAGCGAGTATAGTAAACAGGAGGC                  | 33 |
| 11[42]  | 0[35]   | AACCGTCGAATTCGTAAGAGAGAGGGCTGTCG                   | 31 |
| 1[609]  | 3[594]  | ATTGTTAGAACCTACCATTTGAAAACATAGCGACATTTCCC          | 41 |
| 3[469]  | 2[455]  | GGTTTACCGGAAAATACATACATAAAGATTAGCACCAACCGAC        | 43 |
| 6[608]  | 4[623]  | AACGGATGTCGTCAGATGAATATACAGTAACAGTACTAAAGAAATT     | 46 |
| 11[231] | 6[231]  | AAGGAGTTTTCAATGGTCATTTGACCCCAATTCTGTTTCATT         | 42 |
| 2[76]   | 11[83]  | GGTGTGTTTCGTCATAGTTGAGCTACGTGAACCA                 | 33 |
| 7[133]  | 3[146]  | CGGCCAACCAGGCAAGGGAAGGAATGGTG                      | 29 |
| 11[189] | 6[189]  | CCGGCGCCCGGTAAACTAGAGAGAATCATTGCCTTGAGAGAT         | 42 |
| 0[258]  | 11[272] | TAATTCTTAAGACTTCAAAAATCGTCCAAGTGTAGCGGT            | 38 |
| 3[301]  | 2[287]  | AACTTTACGAACGTAACAAAGCTGCTCTTTAGGAATACGGAAC        | 43 |
| 11[630] | 0[623]  | ATATCCTAATACATTTGGATACTTCATGATG                    | 31 |
| 4[454]  | 9[461]  | AGGCCGGTACCAGTTTCGGTCATAATCAATATG                  | 34 |
| 6[398]  | 4[413]  | AGGCTGAATCCCCCTGCCTATTTTCGGAACCTATTATCAGTAACAGT    | 46 |
| 2[328]  | 11[335] | AACACTCAAAGAGGTGACCTTCTACAGGGCGCG                  | 33 |
| 0[510]  | 11[524] | AATGAATAGATTTTTTGTGTAAGCCAGAGTCTGTCCAT             | 38 |
| 1[525]  | 3[510]  | TAAGTCTTTACGAGCATGTCCAAATAAGAAACGAATATTAT          | 41 |
| 3[427]  | 2[413]  | AGACGATTAAGAACCGCCACCCCTCAGACGTCAGTGCCTTTTTG       | 43 |
| 3[567]  | 5[552]  | TGTAATGAGAAAACTTTTTATAAAGTACCGACACCGAGCCAGT        | 45 |
| 7[385]  | 3[398]  | CTCAGACTCCTCAAGACCAGGCTTGTAAT                      | 29 |
| 11[378] | 0[371]  | TCCTCGCTACTCAGGACGTTTCCACAGCCC                     | 31 |
| 4[118]  | 9[125]  | GACATAAGCCAGCAGTCTCGTTAACGGAACAAGT                 | 34 |
| 8[671]  | 2[665]  | TTATTTAGTATTAACAGAACGA                             | 22 |
| 7[49]   | 3[62]   | TCCACAGGCGGGCCGCGCGTGCATTAACG                      | 29 |
| 0[174]  | 11[188] | ACATTACGTCCTGTAGCCACAGAAATTGACGGGGAAAG             | 38 |
| 3[259]  | 2[245]  | AAAAAGAAGTGCTTTAAACAGTTCAGATAGATGGCTTAGAGTA        | 43 |
| 4[370]  | 9[377]  | AATAGAAAACCTTTCTTGCTTTTAGTTGCGCGGTT                | 34 |
| 6[629]  | 7[636]  | ATCTTTACATCGGGAACCAAGTTAGACAACCTCGTATT             | 38 |
| 0[286]  | 0[259]  | GTCAGGACGTTGGGAAGTCGCGTTT                          | 25 |
| 7[679]  | 3[20]   | CACCAGGTGGTCCGAGCCCGATTCT                          | 27 |
| 3[91]   | 2[77]   | TCGCACTGGGAATGCCAACGGCAGCACGGTTACCTGTACACT         | 43 |
| 4[160]  | 9[167]  | TTGAGGGGCGCATCGCTGCGCTTCGCTATTCAGG                 | 34 |
| 2[244]  | 11[251] | CCTTTAACAACAGGAGCTATACGGGCGCTAGGG                  | 33 |
| 5[553]  | 6[546]  | AATAAGAGGATTAGGCAGAGGCAT                           | 24 |
| 3[385]  | 2[371]  | ACTGAGTGGCCTCAGAACCGCCACCCCTGCAACAGTTTTTAGTA       | 43 |
| 3[651]  | 5[636]  | GGTGAGGGCTGAGAGCCAGCACATTATCATTTTGCTAATTTTAAA      | 45 |
| 11[315] | 6[315]  | GCGCCGCATCAACCAGGCGAGAGGACAGGGAACCGAACGAGG         | 42 |

|         |         |                                               |    |
|---------|---------|-----------------------------------------------|----|
| 4[34]   | 9[41]   | TTCACCGAGTGAGATAAATCATCCAGTTTGTCAT            | 34 |
| 6[83]   | 7[90]   | GGTGTGCACTCTGTGGGTCATACCGCGTCGGTGGTGCC        | 38 |
| 0[538]  | 0[511]  | GCGCCTGTTTATCAACAACGTCAAA                     | 25 |
| 0[384]  | 11[398] | CACAGAGAACTACAACGCCTATCACTTAGAATCAGAGC        | 38 |
| 2[202]  | 11[209] | GAGTAATCATATATTATGTACAACGTGGCGAGA             | 33 |
| 9[504]  | 1[524]  | TTGCTATTTTGCAAGAACGCGAGGTTTTTAATAGA           | 35 |
| 11[63]  | 6[63]   | GGCCAGATCCCGTCCGTGGCCAGCATTTCACGTGCTGCGG      | 42 |
| 0[90]   | 11[104] | CTGTTGCCGTTGCGGTATGGCGTGGAATCAAGTTTTT         | 38 |
| 1[273]  | 3[258]  | TCTACGTTACAGGTAGAAAAGAGGAAGCCCGAAGAGGCATC     | 41 |
| 3[217]  | 2[203]  | TTGTACCACTAGTAGTAGCATTAAACATGAGCCGAGAATGCCT   | 43 |
| 3[483]  | 5[468]  | GTCAGAGCAAGAATTGAGTTAATCAATAGAAAATTACATAAGTTT | 45 |
| 6[671]  | 7[678]  | ATTTGCTGAACCTCAACAAATCAACACATTGGCAGATT        | 38 |
| 4[286]  | 9[293]  | AATGCAGTGAGATTTTGCAAAGTTTAGACTATTC            | 34 |
| 0[202]  | 0[175]  | ACGCAAGGATAAAAATTTTTCATCA                     | 25 |
| 7[595]  | 3[608]  | AATCAAGCCTGATTGCGAATTACCATCAA                 | 29 |
| 5[469]  | 6[462]  | ATTTTGTCCCACGCAAAGACACCA                      | 24 |
| 6[20]   | 4[35]   | TGTTTGAGAGTTGCAGCAAGCGGTCCACGCTGGTAGGATTGCCC  | 44 |
| 3[315]  | 5[300]  | ATTATACCATCGCCTGATAAGCTTGAGATGGTTAACGAACGAGT  | 45 |
| 11[252] | 0[245]  | CGCTGGATAAATATTCATTTTCAGGAGAGCTT              | 31 |
| 11[651] | 6[651]  | CGCCAGGATTAGTCTTTAGGAATTGATCAGTTGGATATCAAA    | 42 |
| 6[419]  | 7[426]  | ACTCTGAAACATGAAATAGGATTAGGCCACCACCCTCA        | 38 |
| 1[483]  | 3[468]  | TAAAAATGAACACCCTGAGCGCCAAAGACAAATCTTCATAT     | 41 |

## 14 Reference

- 1 Maier, J. A., Martinez, C., Kasavajhala, K., Wickstrom, L., Hauser, K. E. and Simmerling, C. ff14SB: Improving the Accuracy of Protein Side Chain and Backbone Parameters from ff99SB. *J. Chem. Theory Comput.* **2015**, *11* (8), 3696-3713.
- 2 Wang, J. M., Wolf, R. M., Caldwell, J. W., Kollman, P. A. and Case, D. A. Development and testing of a general amber force field. *J. Comput. Chem.* **2004**, *25* (1), 1157-1174.
- 3 Dong, X., Yuan, X. H., Song, Z. L. and Wang, Q. T. The development of an Amber-compatible organosilane force field for drug-like small molecules. *Physical Chemistry Chemical Physics* **2021**, *23* (22), 12582-12591.
- 4 York, D. M., Wlodawer, A., Pedersen, L. G. and Darden, T. A. Atomic-Level Accuracy in Simulations of Large Protein Crystals. *Proc. Natl. Acad. Sci. USA* **1994**, *91* (18), 8715-8718.
